# Supplementary material for: A novel immunogenic cell death signature for the prediction of prognosis and therapies in glioma
Source: PeerJ journal article supplement (doi:10.7717/peerj.15615), 2023-07-11

A

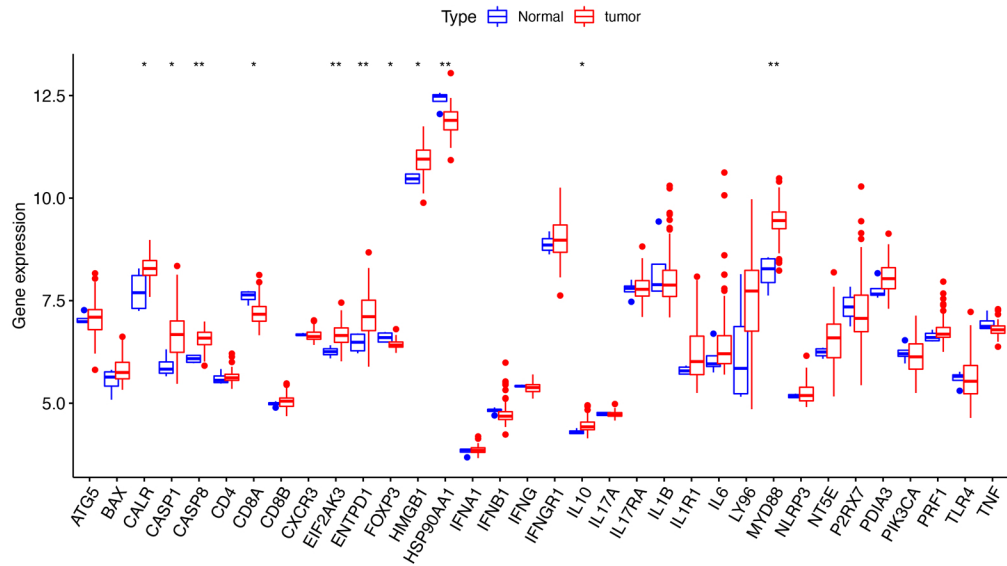

B

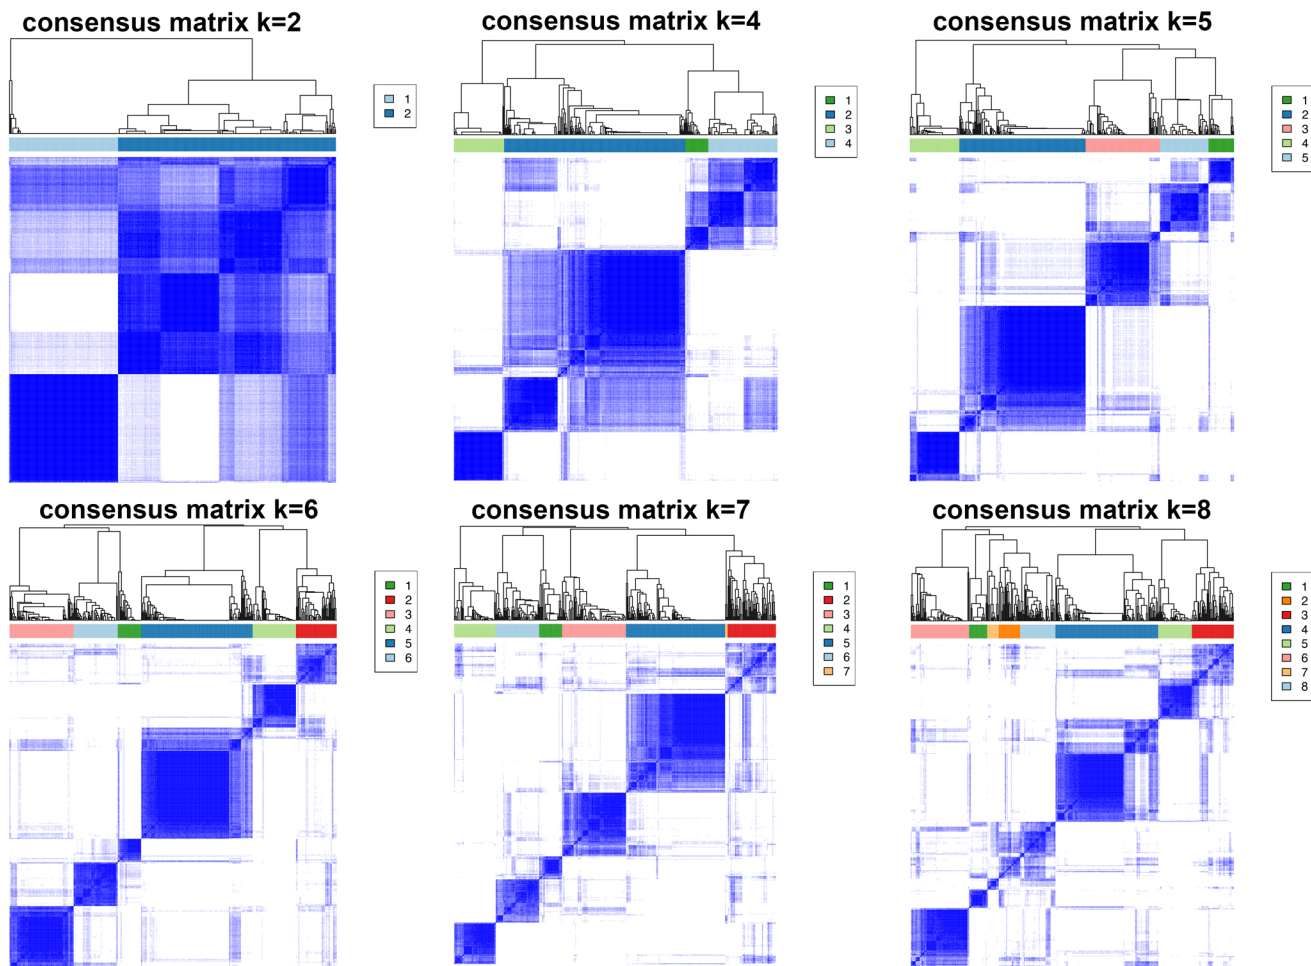

Supplement: Figure_S1.pdf [file Figure_S1.pdf]
