# Supplementary material for: A novel immunogenic cell death signature for the prediction of prognosis and therapies in glioma
Source: PeerJ journal article supplement (doi:10.7717/peerj.15615), 2023-07-11

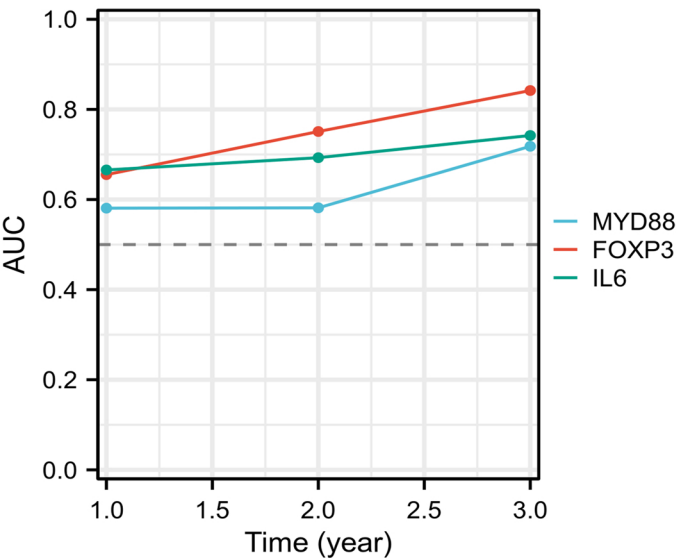

Supplement: Figure_S2.pdf [file Figure_S2.pdf]
