# Supplementary figures and images for: A novel immunogenic cell death signature for the prediction of prognosis and therapies in glioma
Source: PeerJ journal article supplement (doi:10.7717/peerj.15615), 2023-07-11

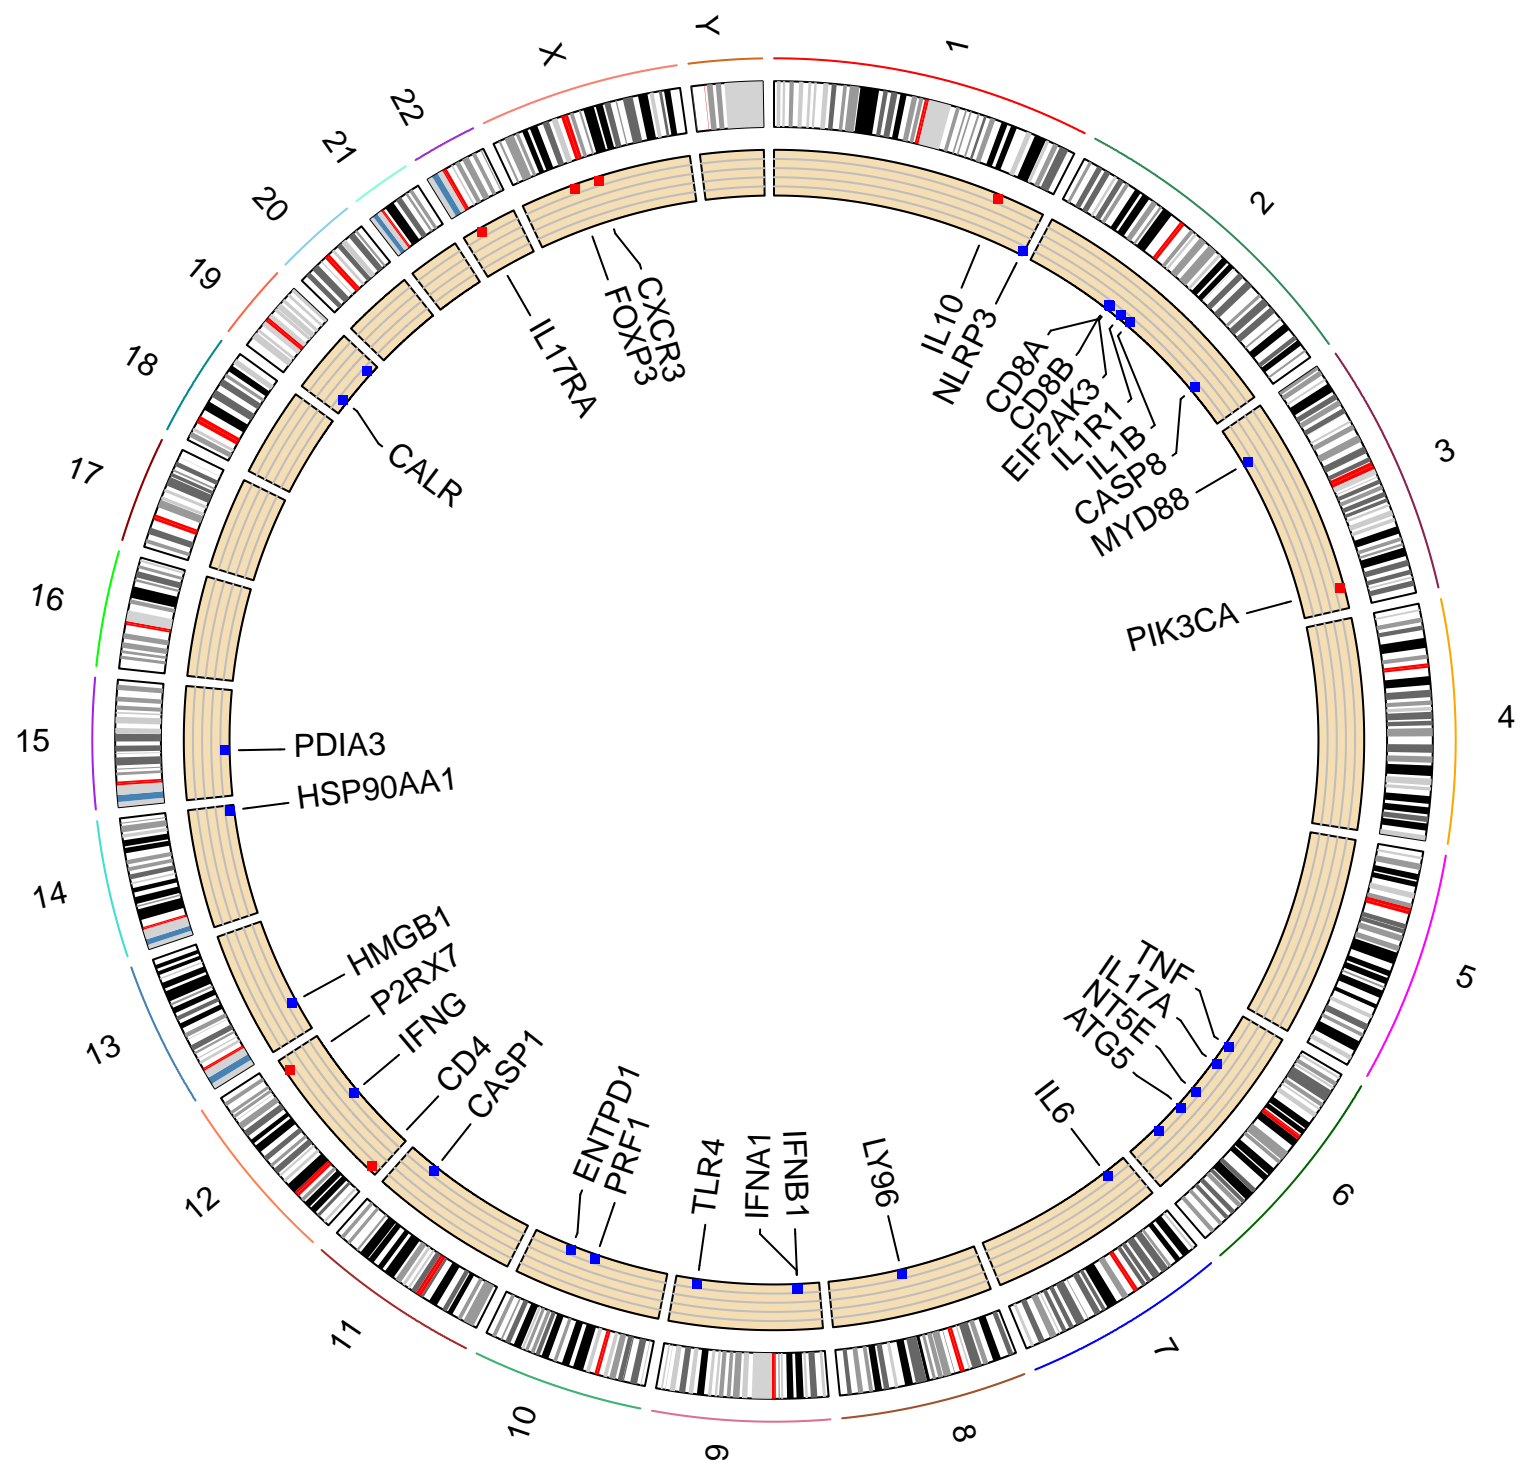

Supplement: Figure_1.zip [file Figure_1.zip]

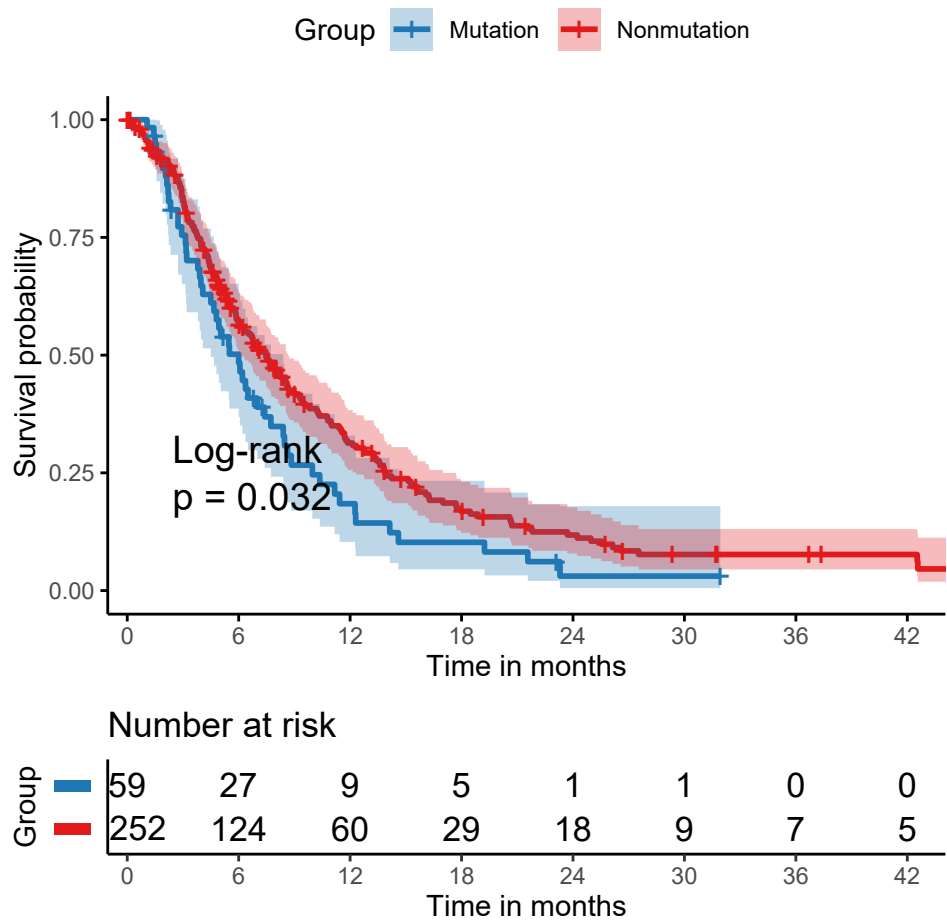

Supplement: Figure_1.zip [file Figure_1.zip]

Type Normal tumor

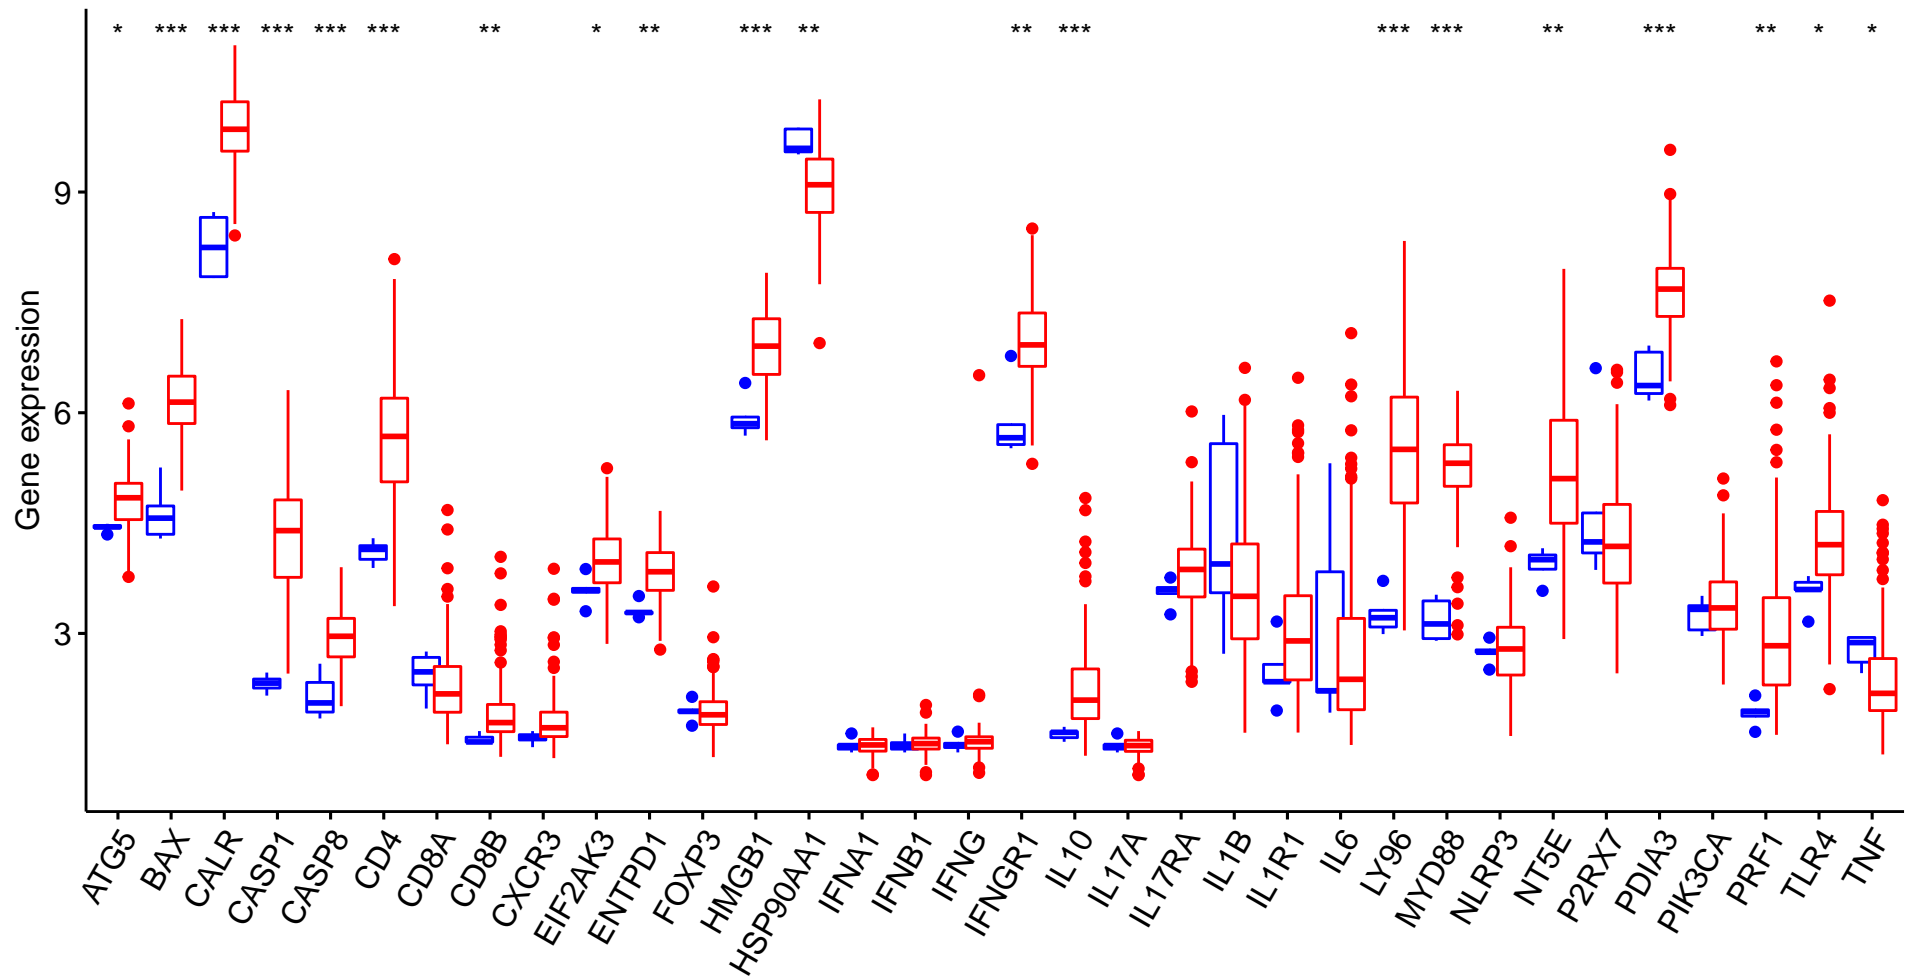

Supplement: Figure_1.zip [file Figure_1.zip]

Altered in 69 (18.6%) of 371 samples.

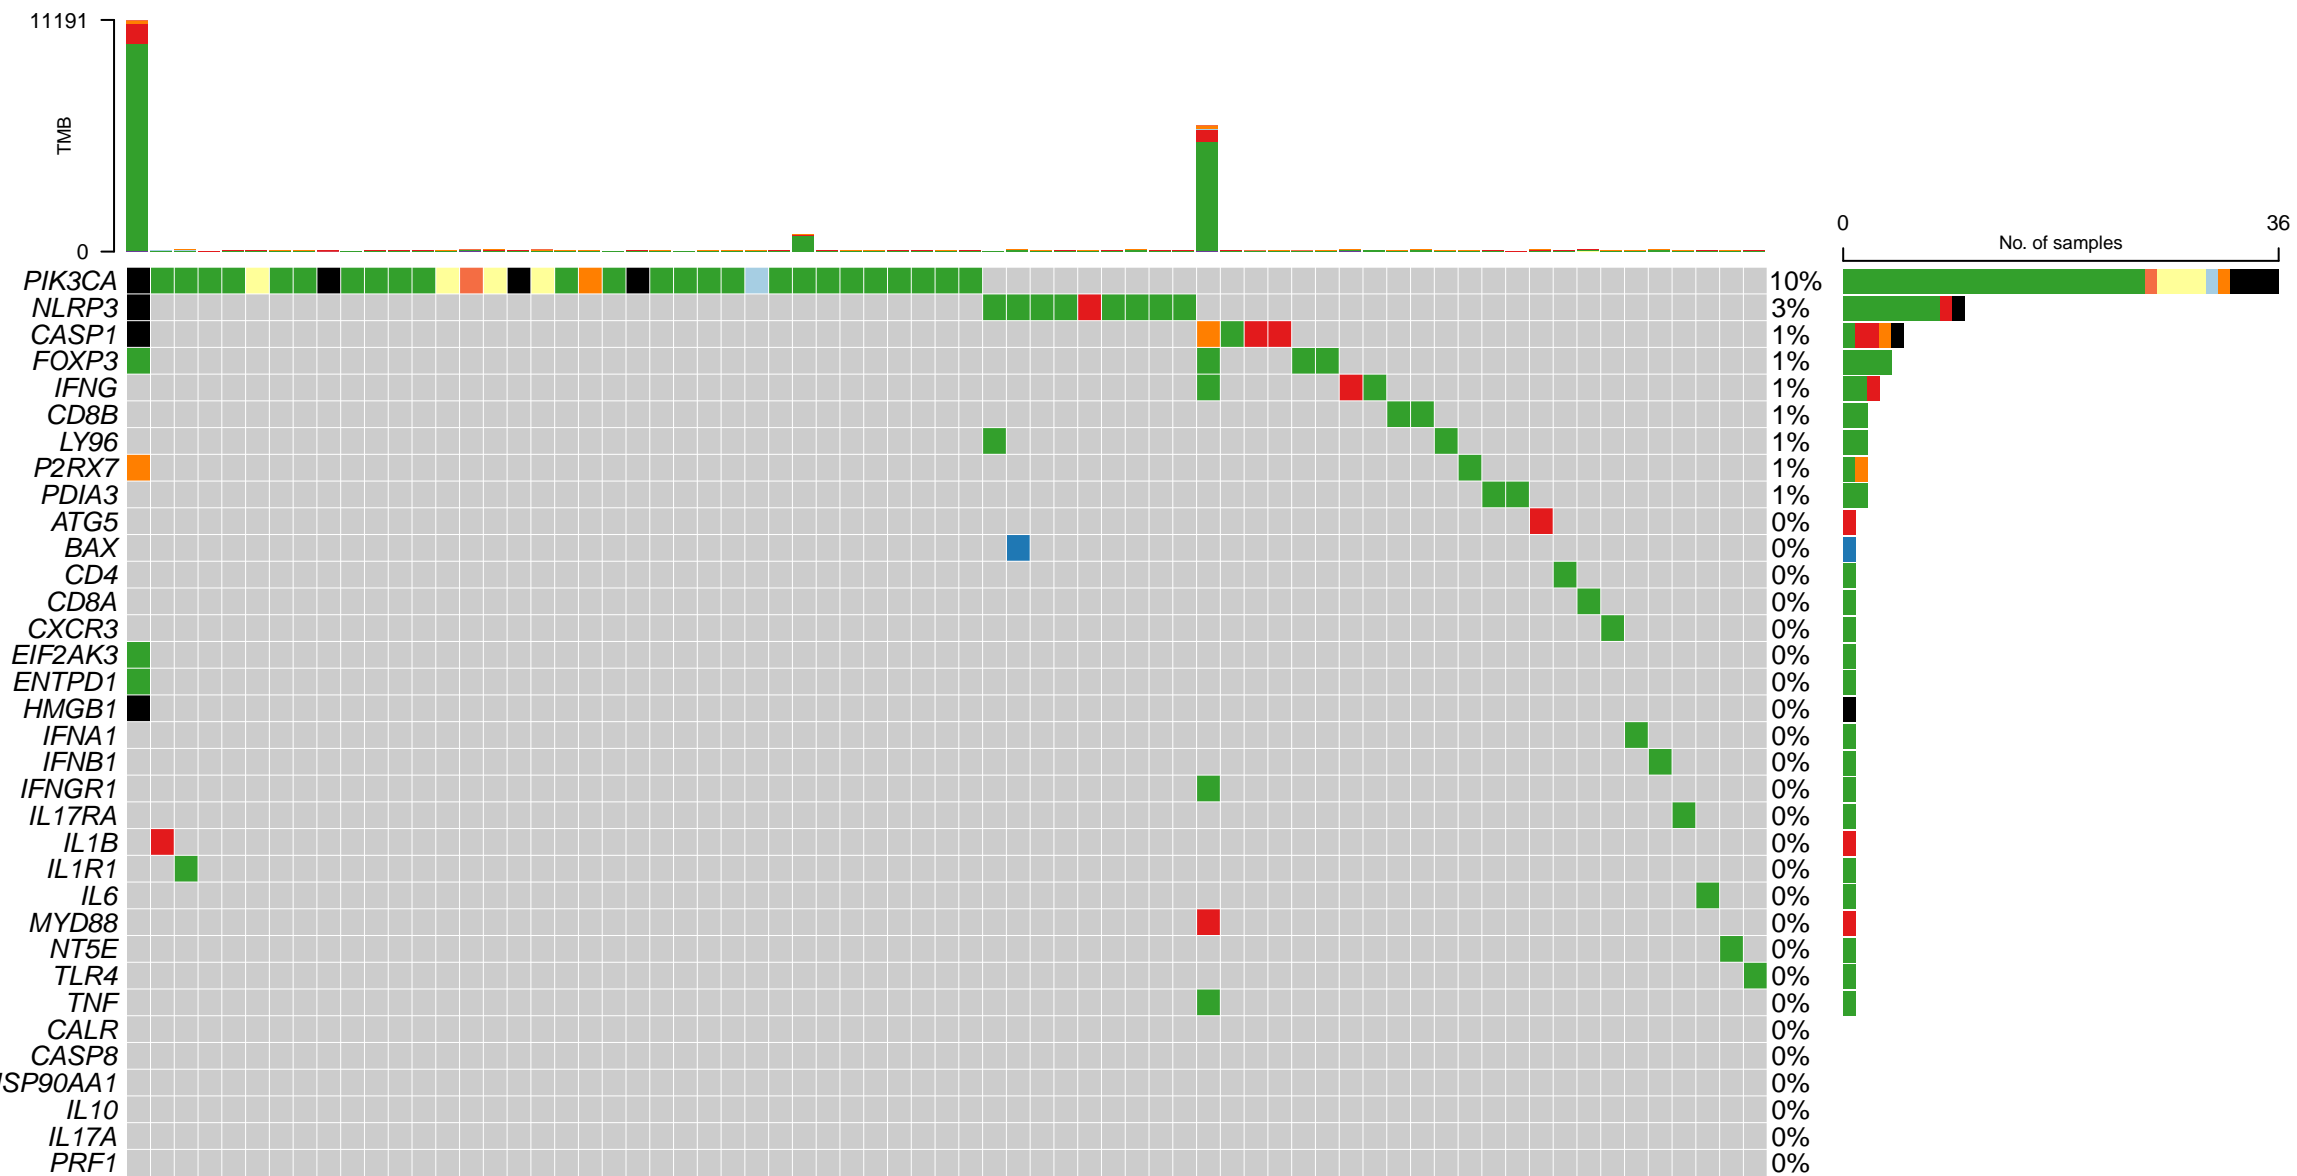

Supplement: Figure_1.zip [file Figure_1.zip]

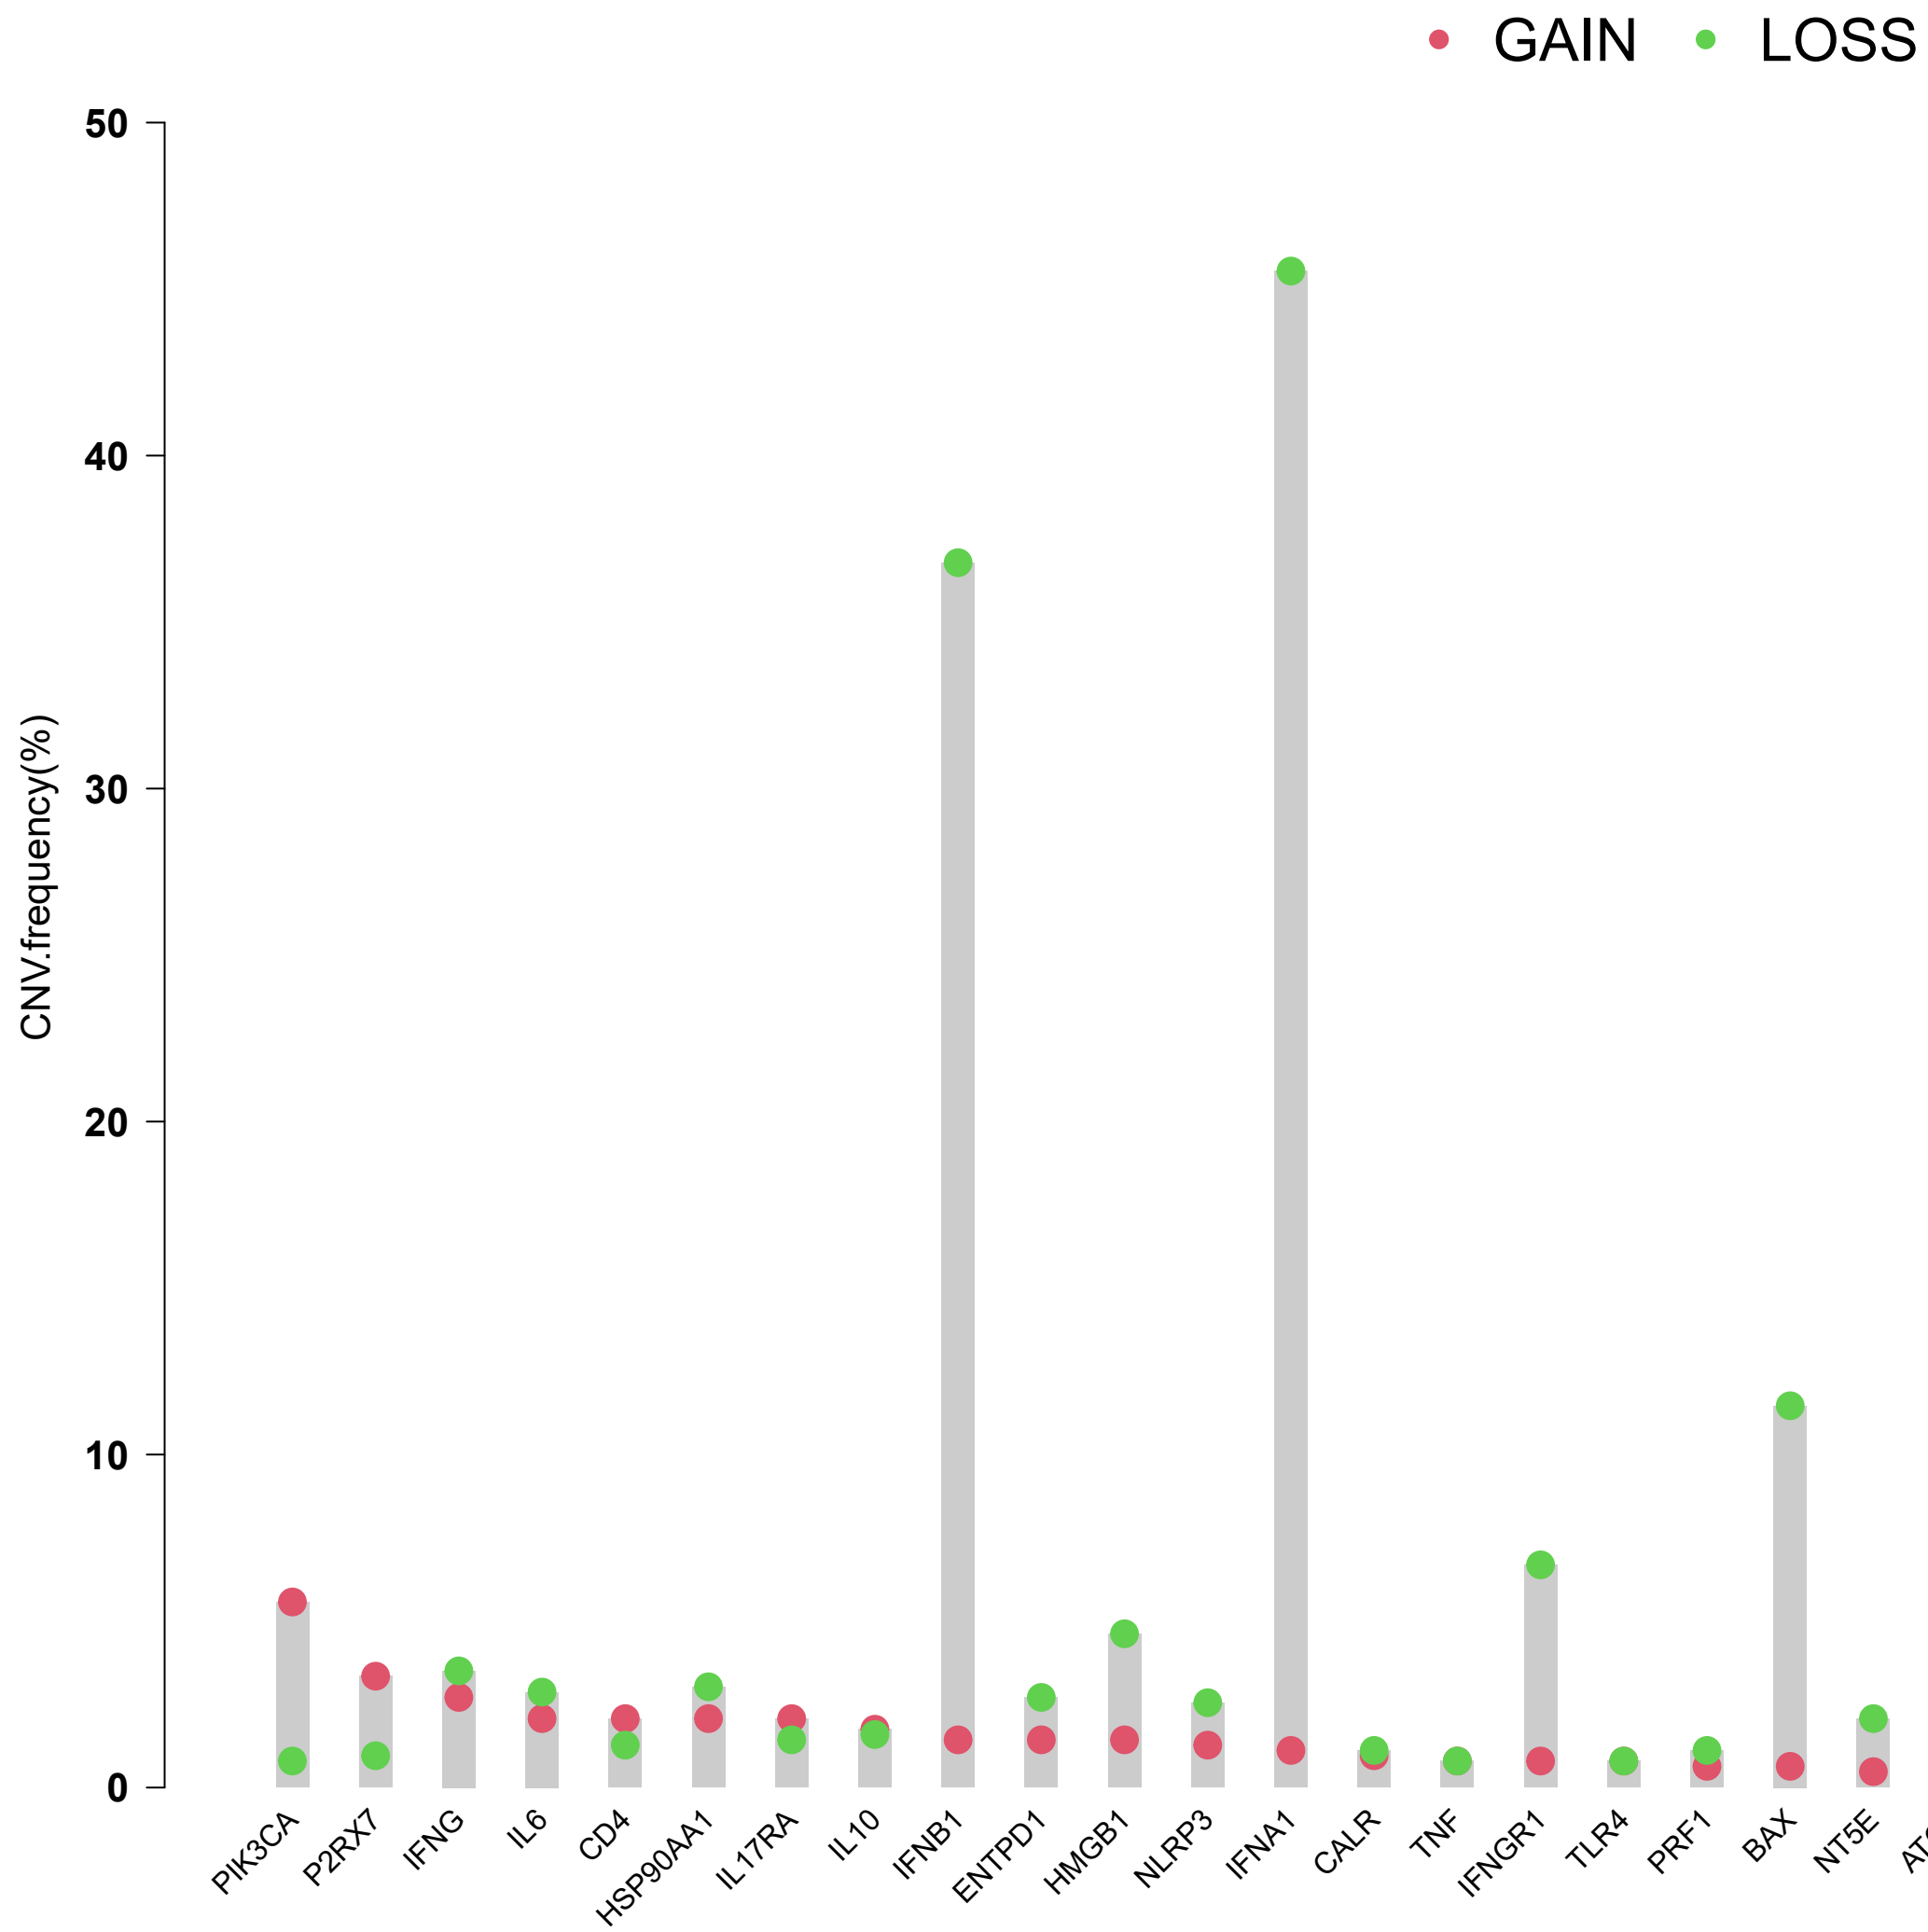

Supplement: Figure_1.zip [file Figure_1.zip]

## Delta area

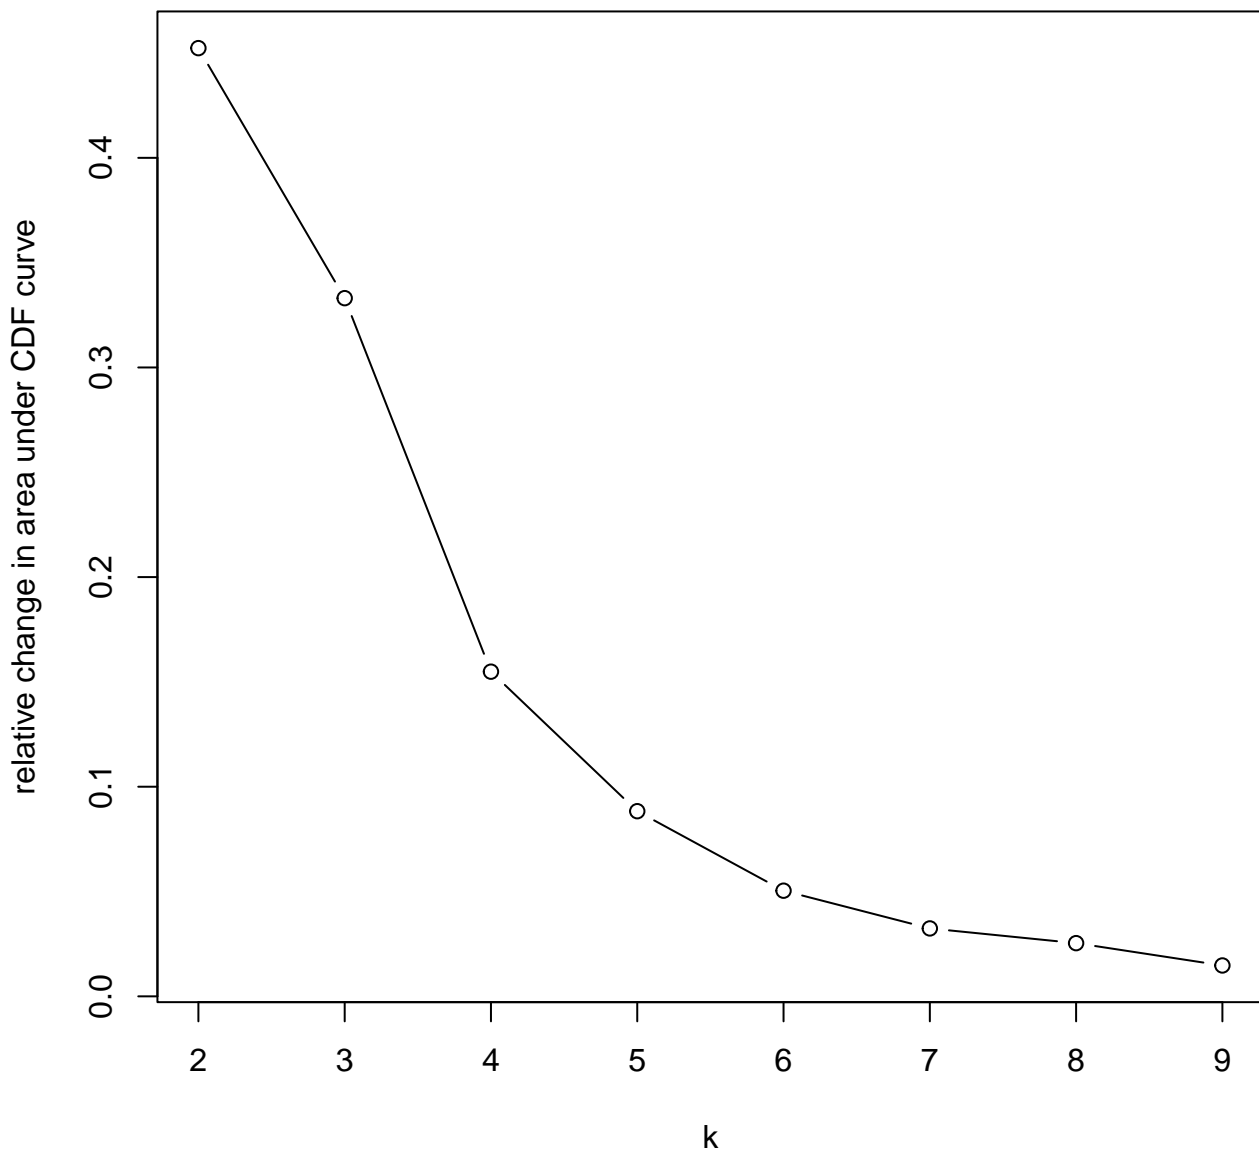

Supplement: Figure_2.zip [file Figure_2.zip]

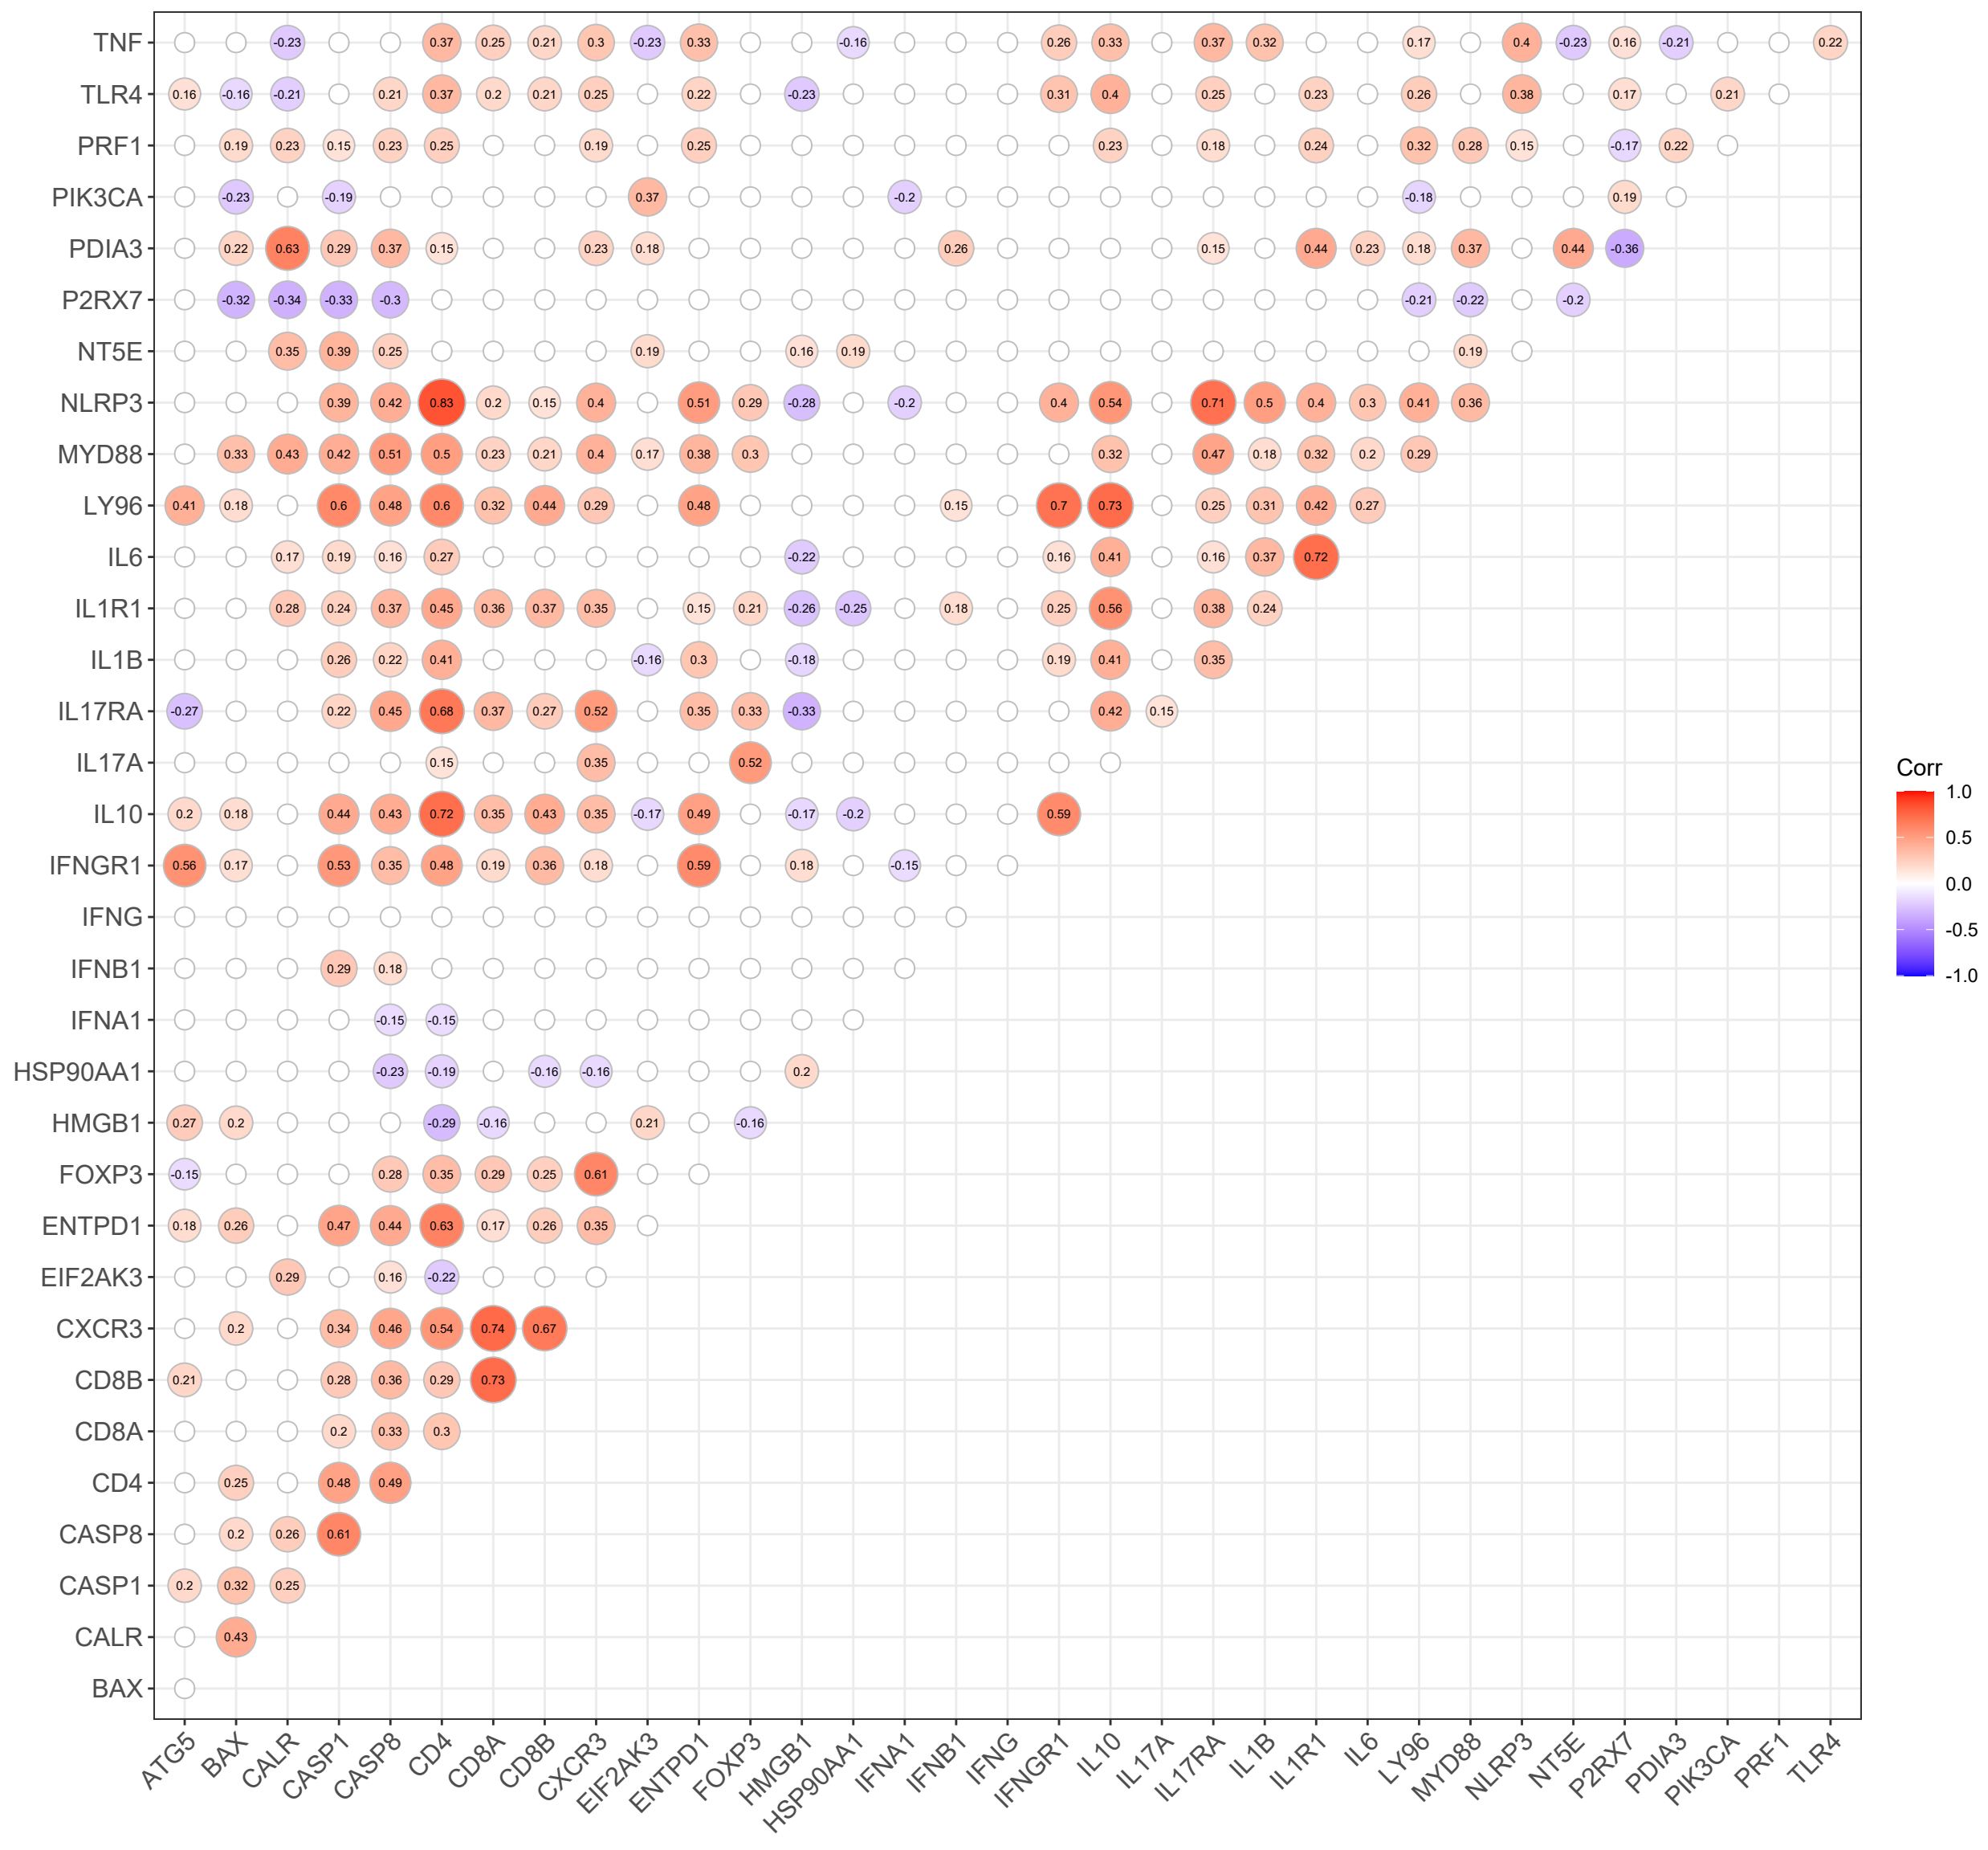

Supplement: Figure_2.zip [file Figure_2.zip]

### consensus CDF

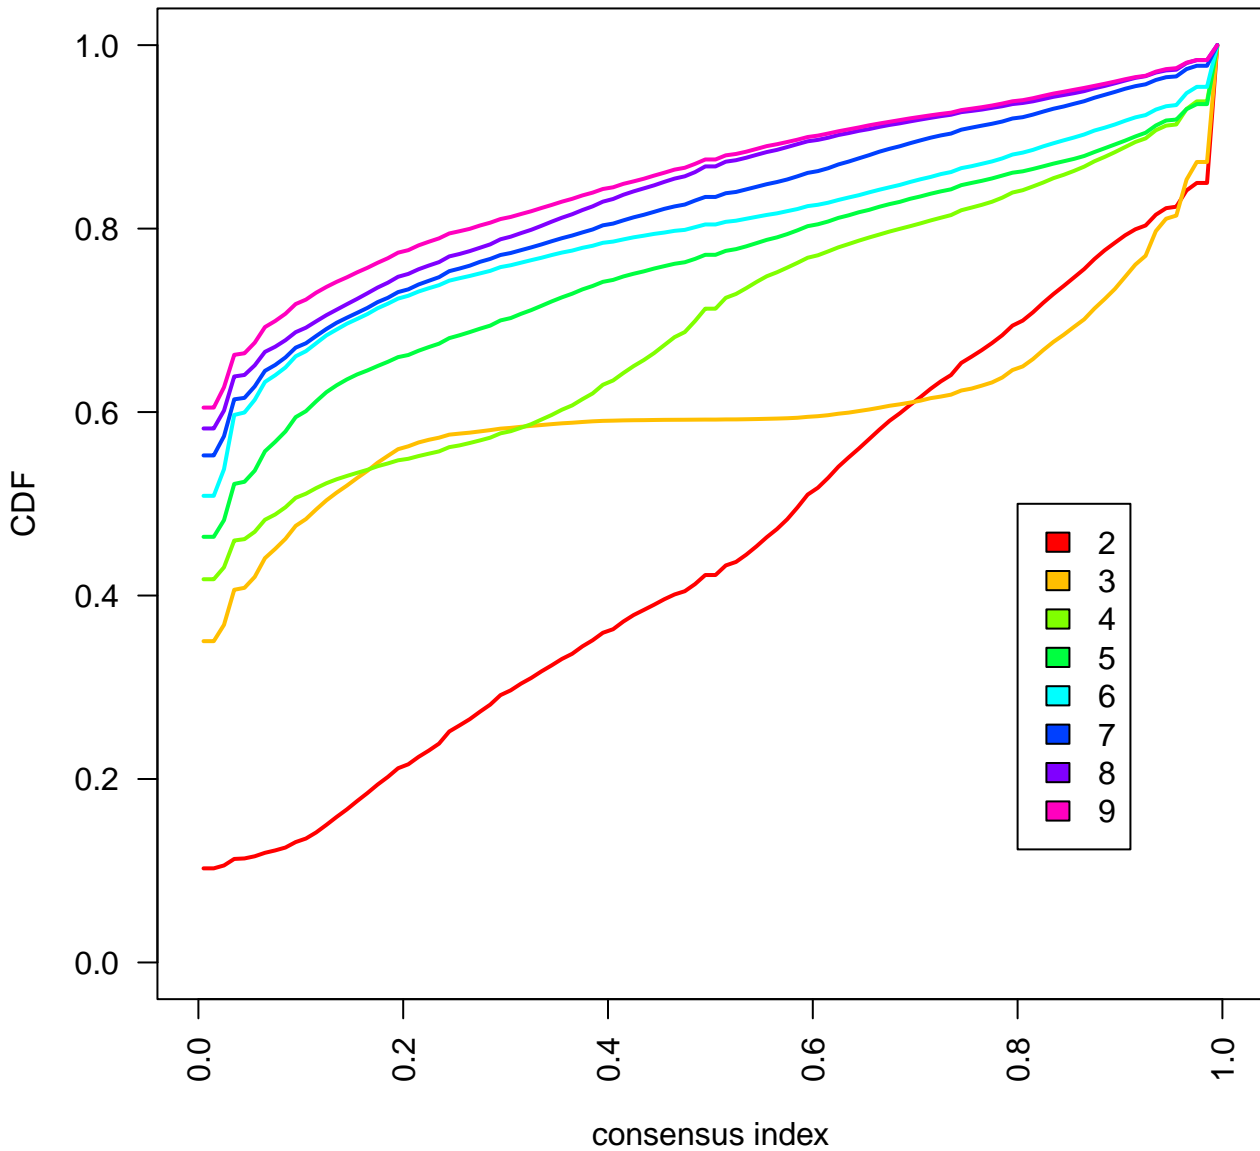

Supplement: Figure_2.zip [file Figure_2.zip]

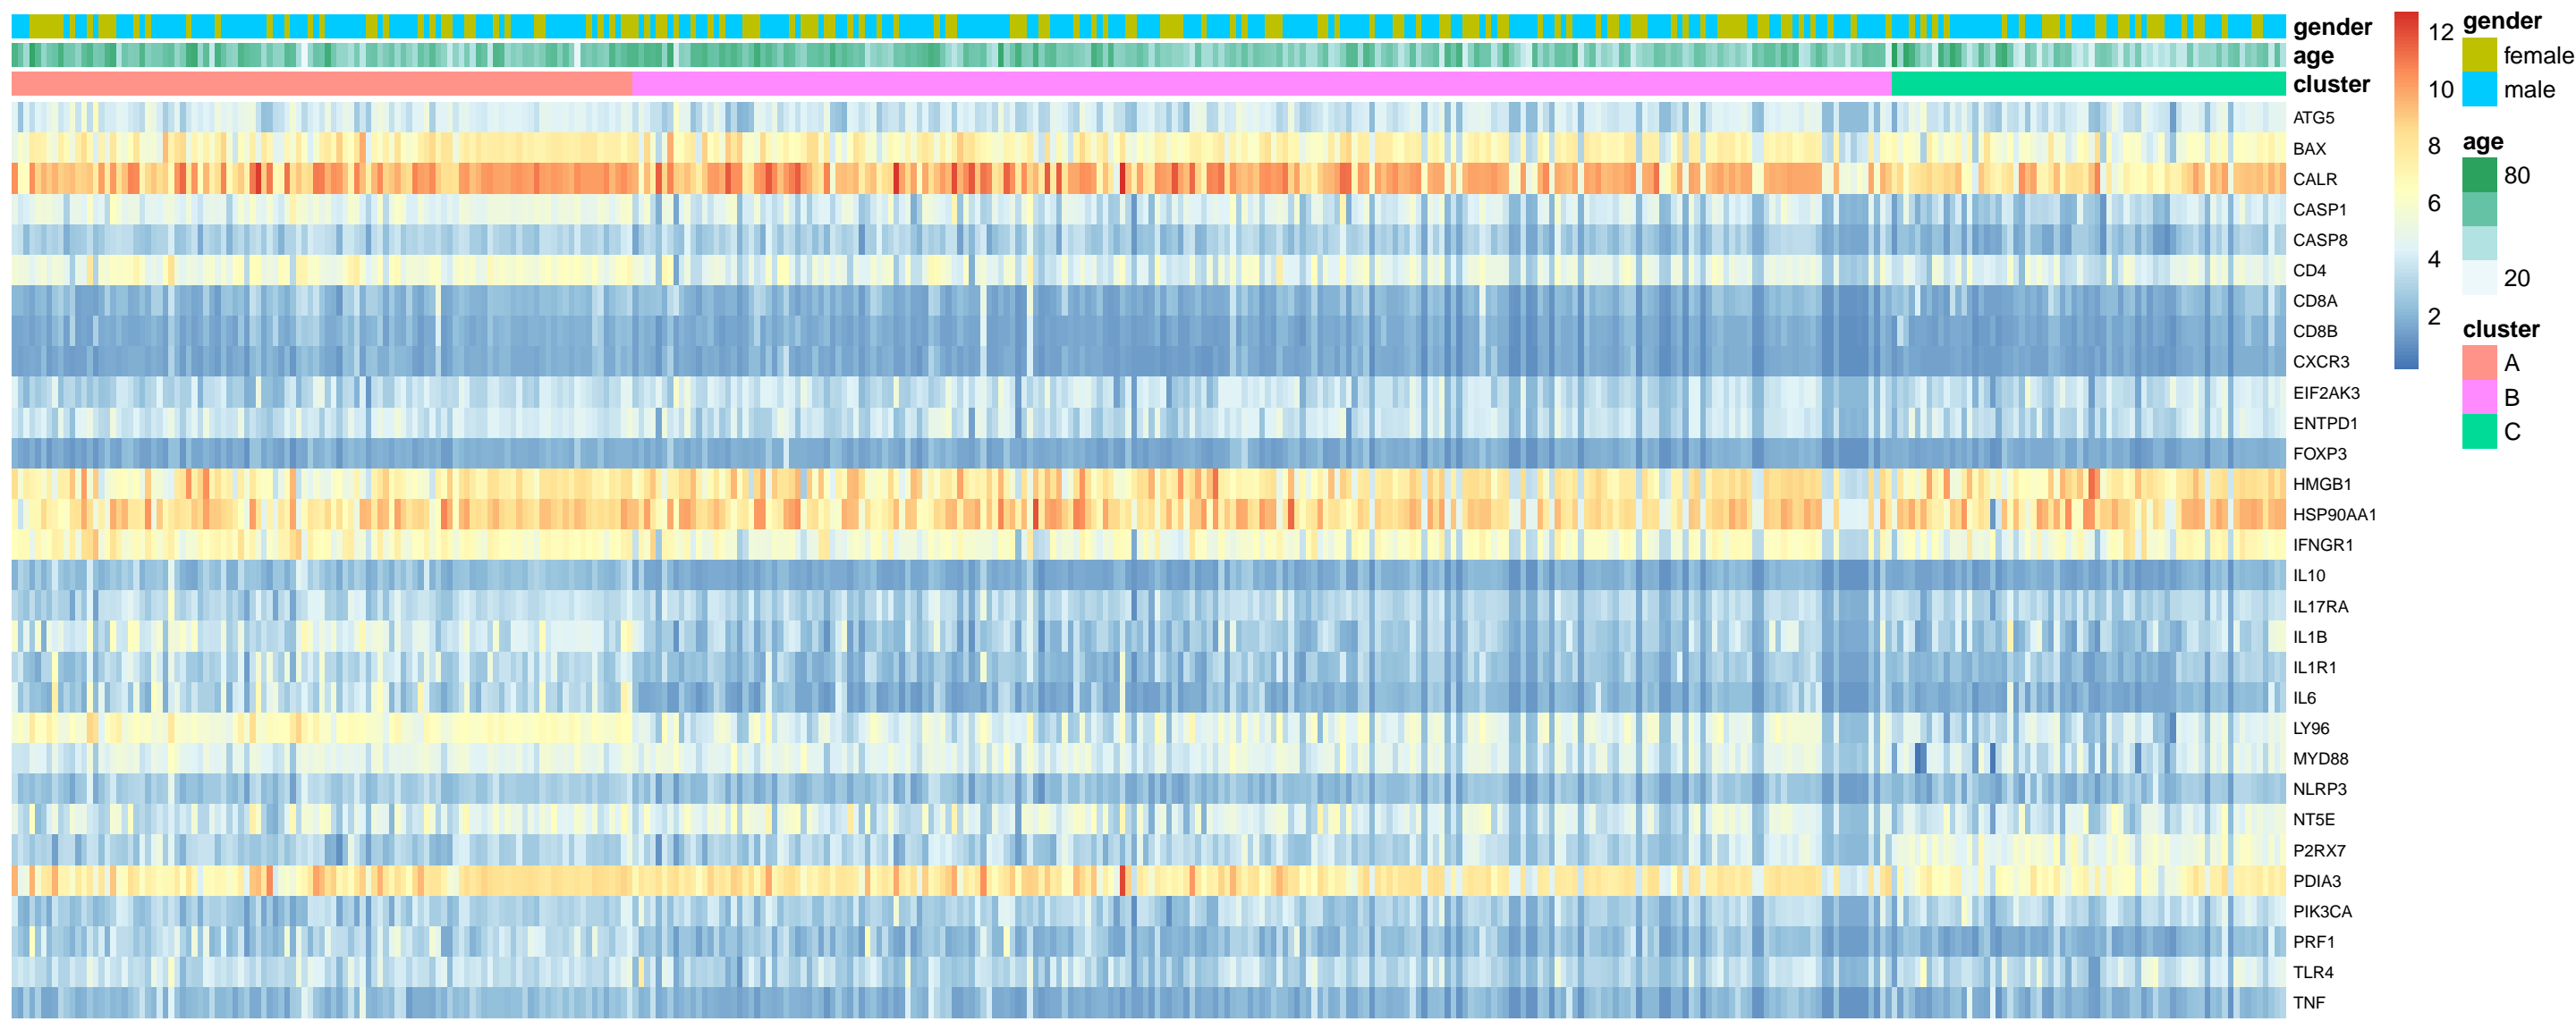

Supplement: Figure_2.zip [file Figure_2.zip]

consensus matrix k=3

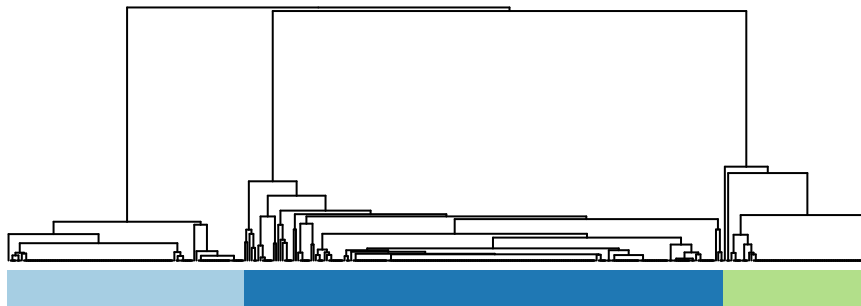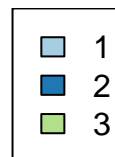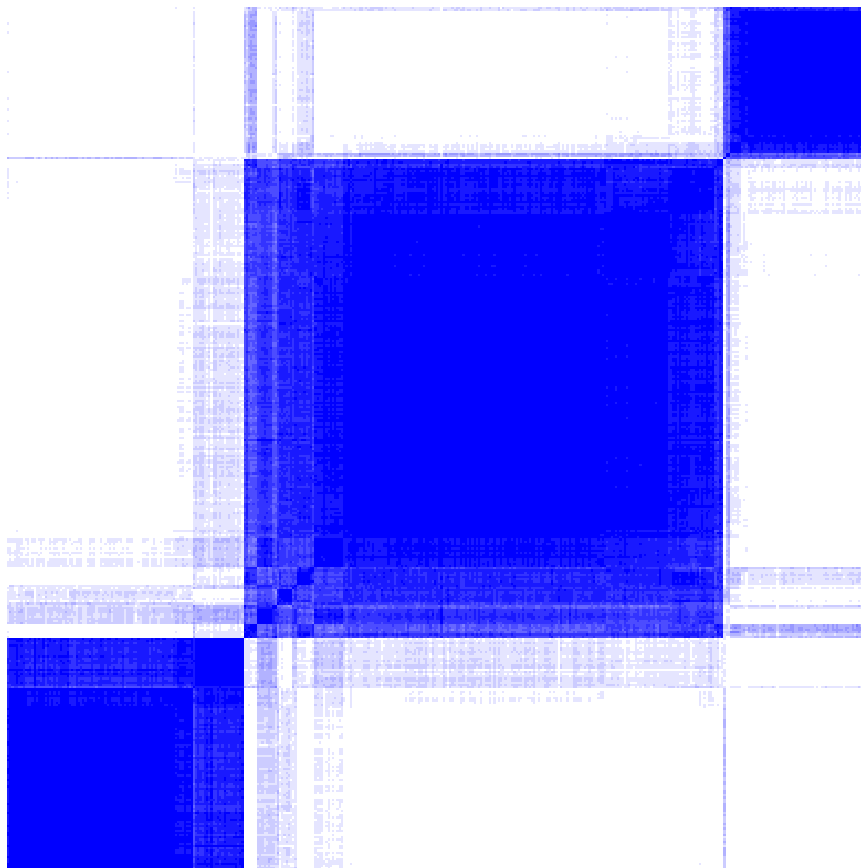

Supplement: Figure_2.zip [file Figure_2.zip]

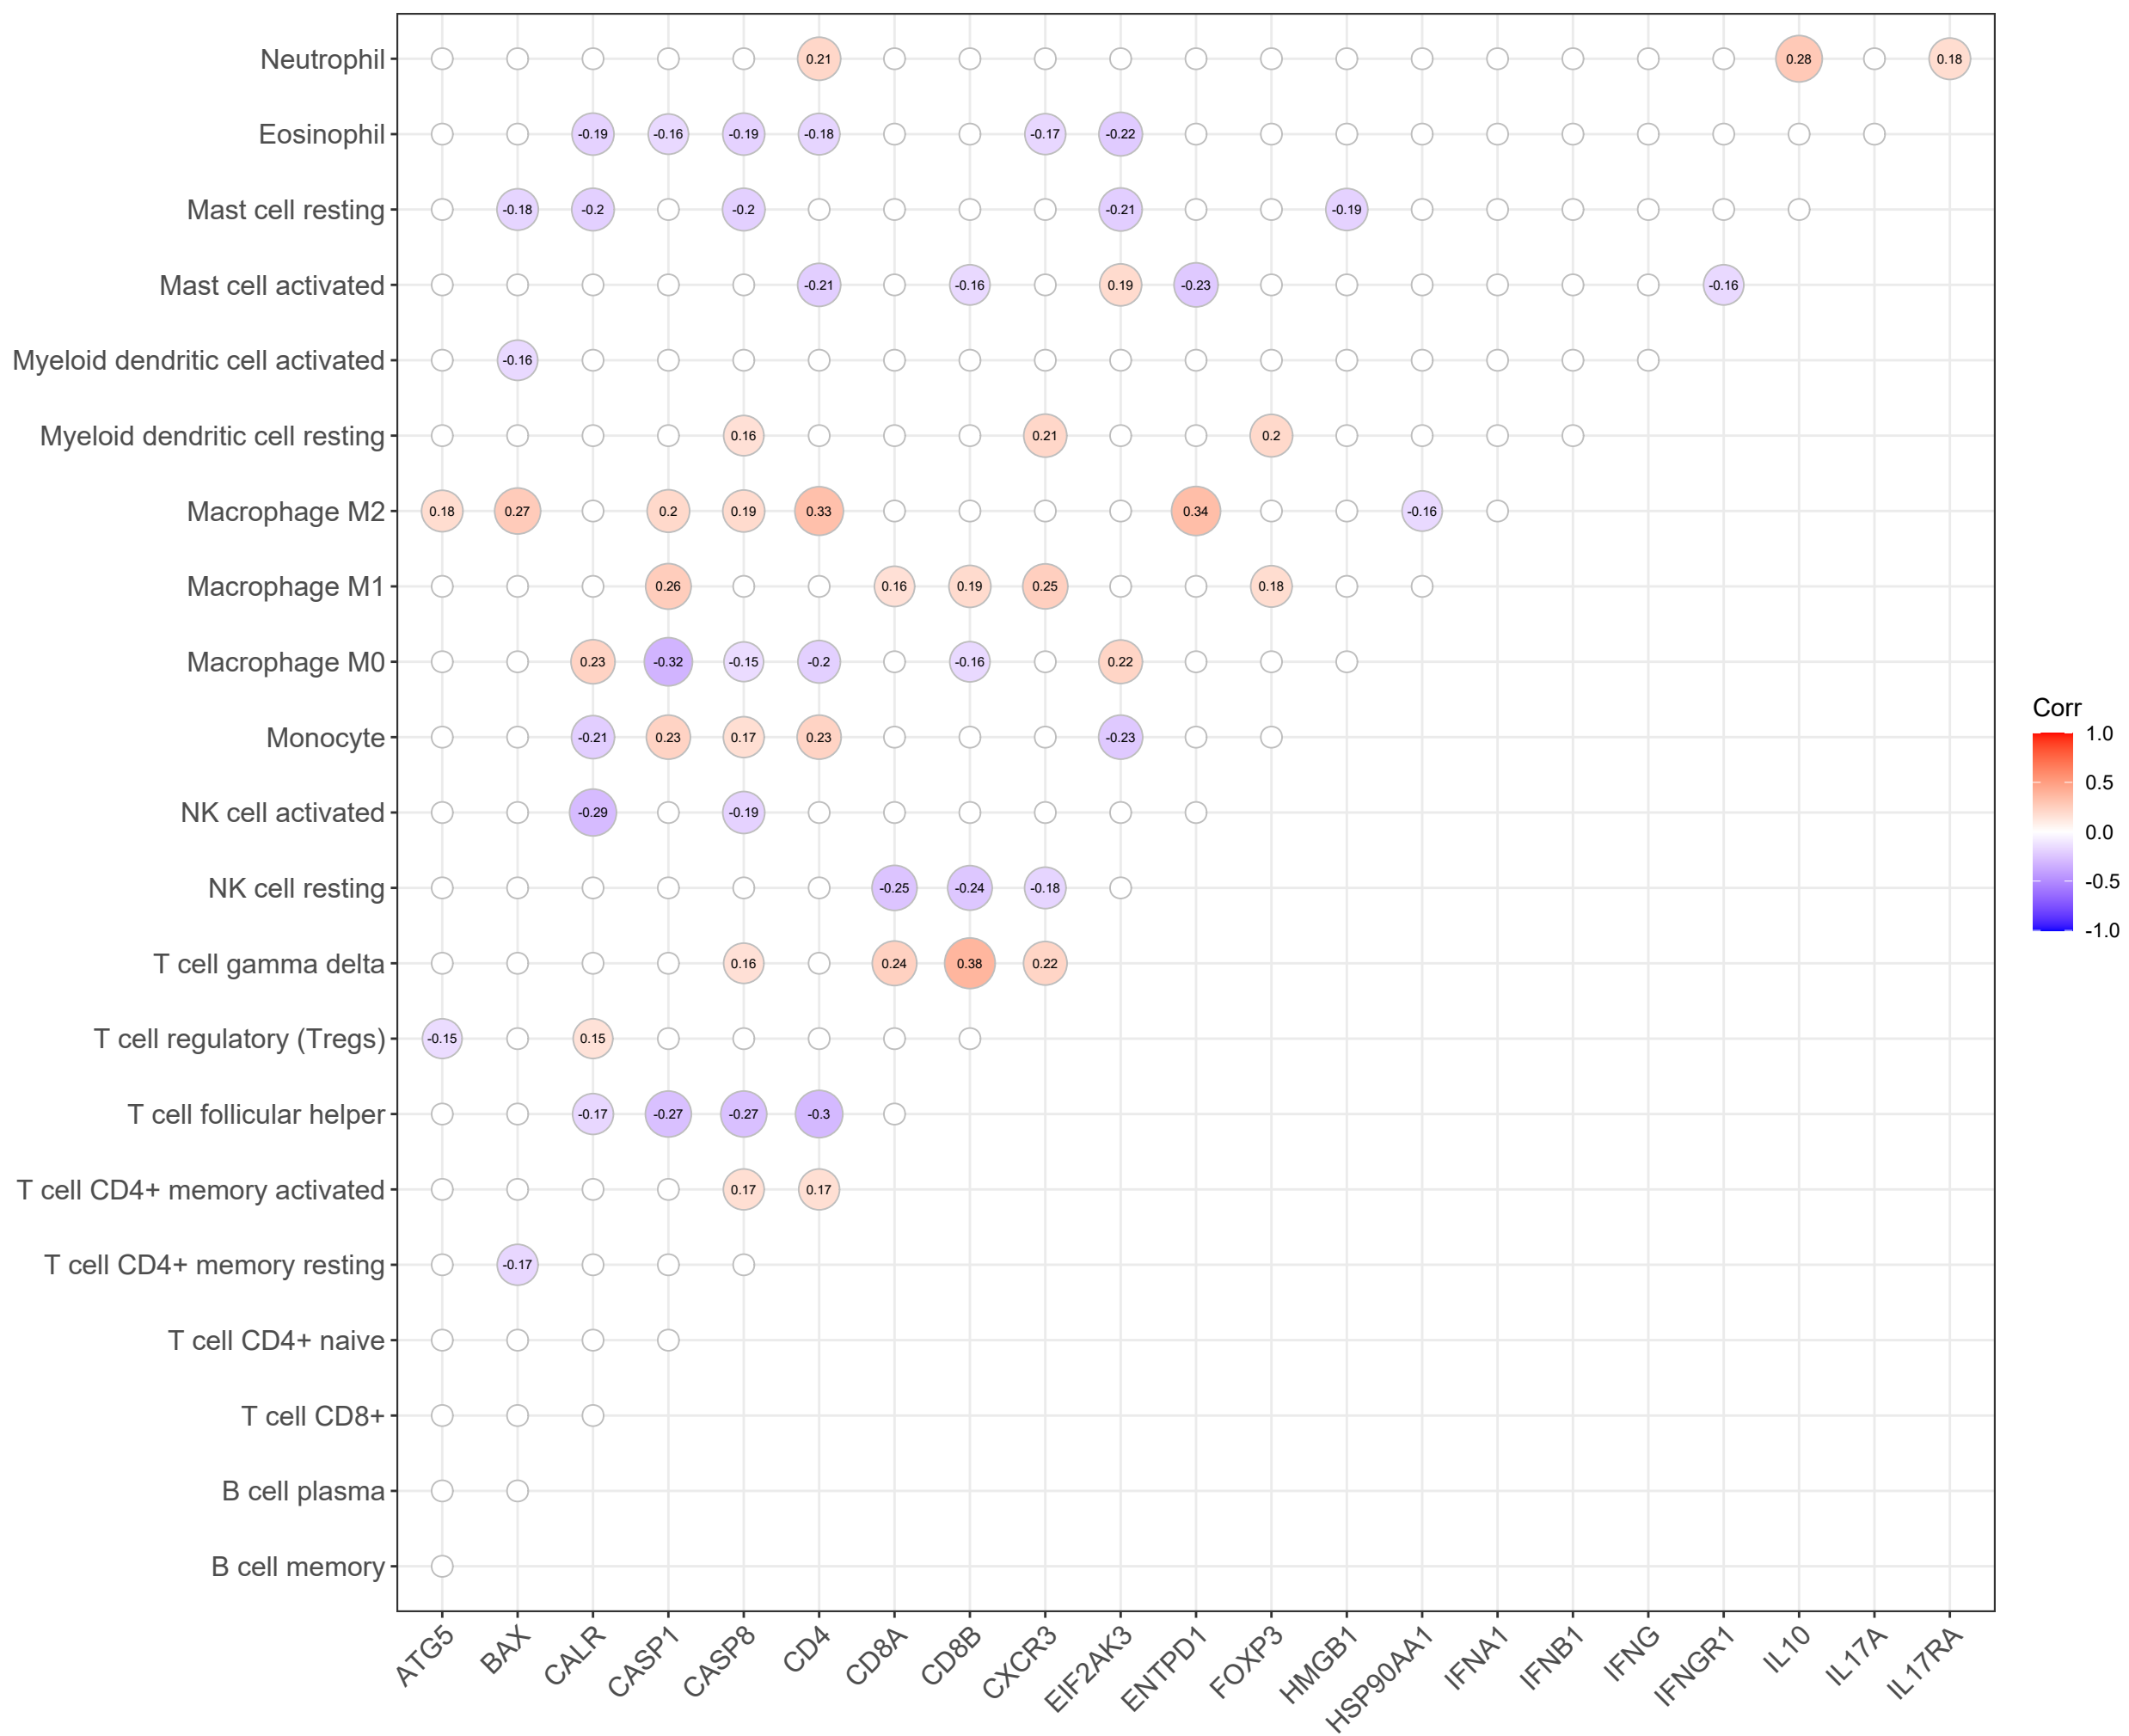

Supplement: Figure_2.zip [file Figure_2.zip]

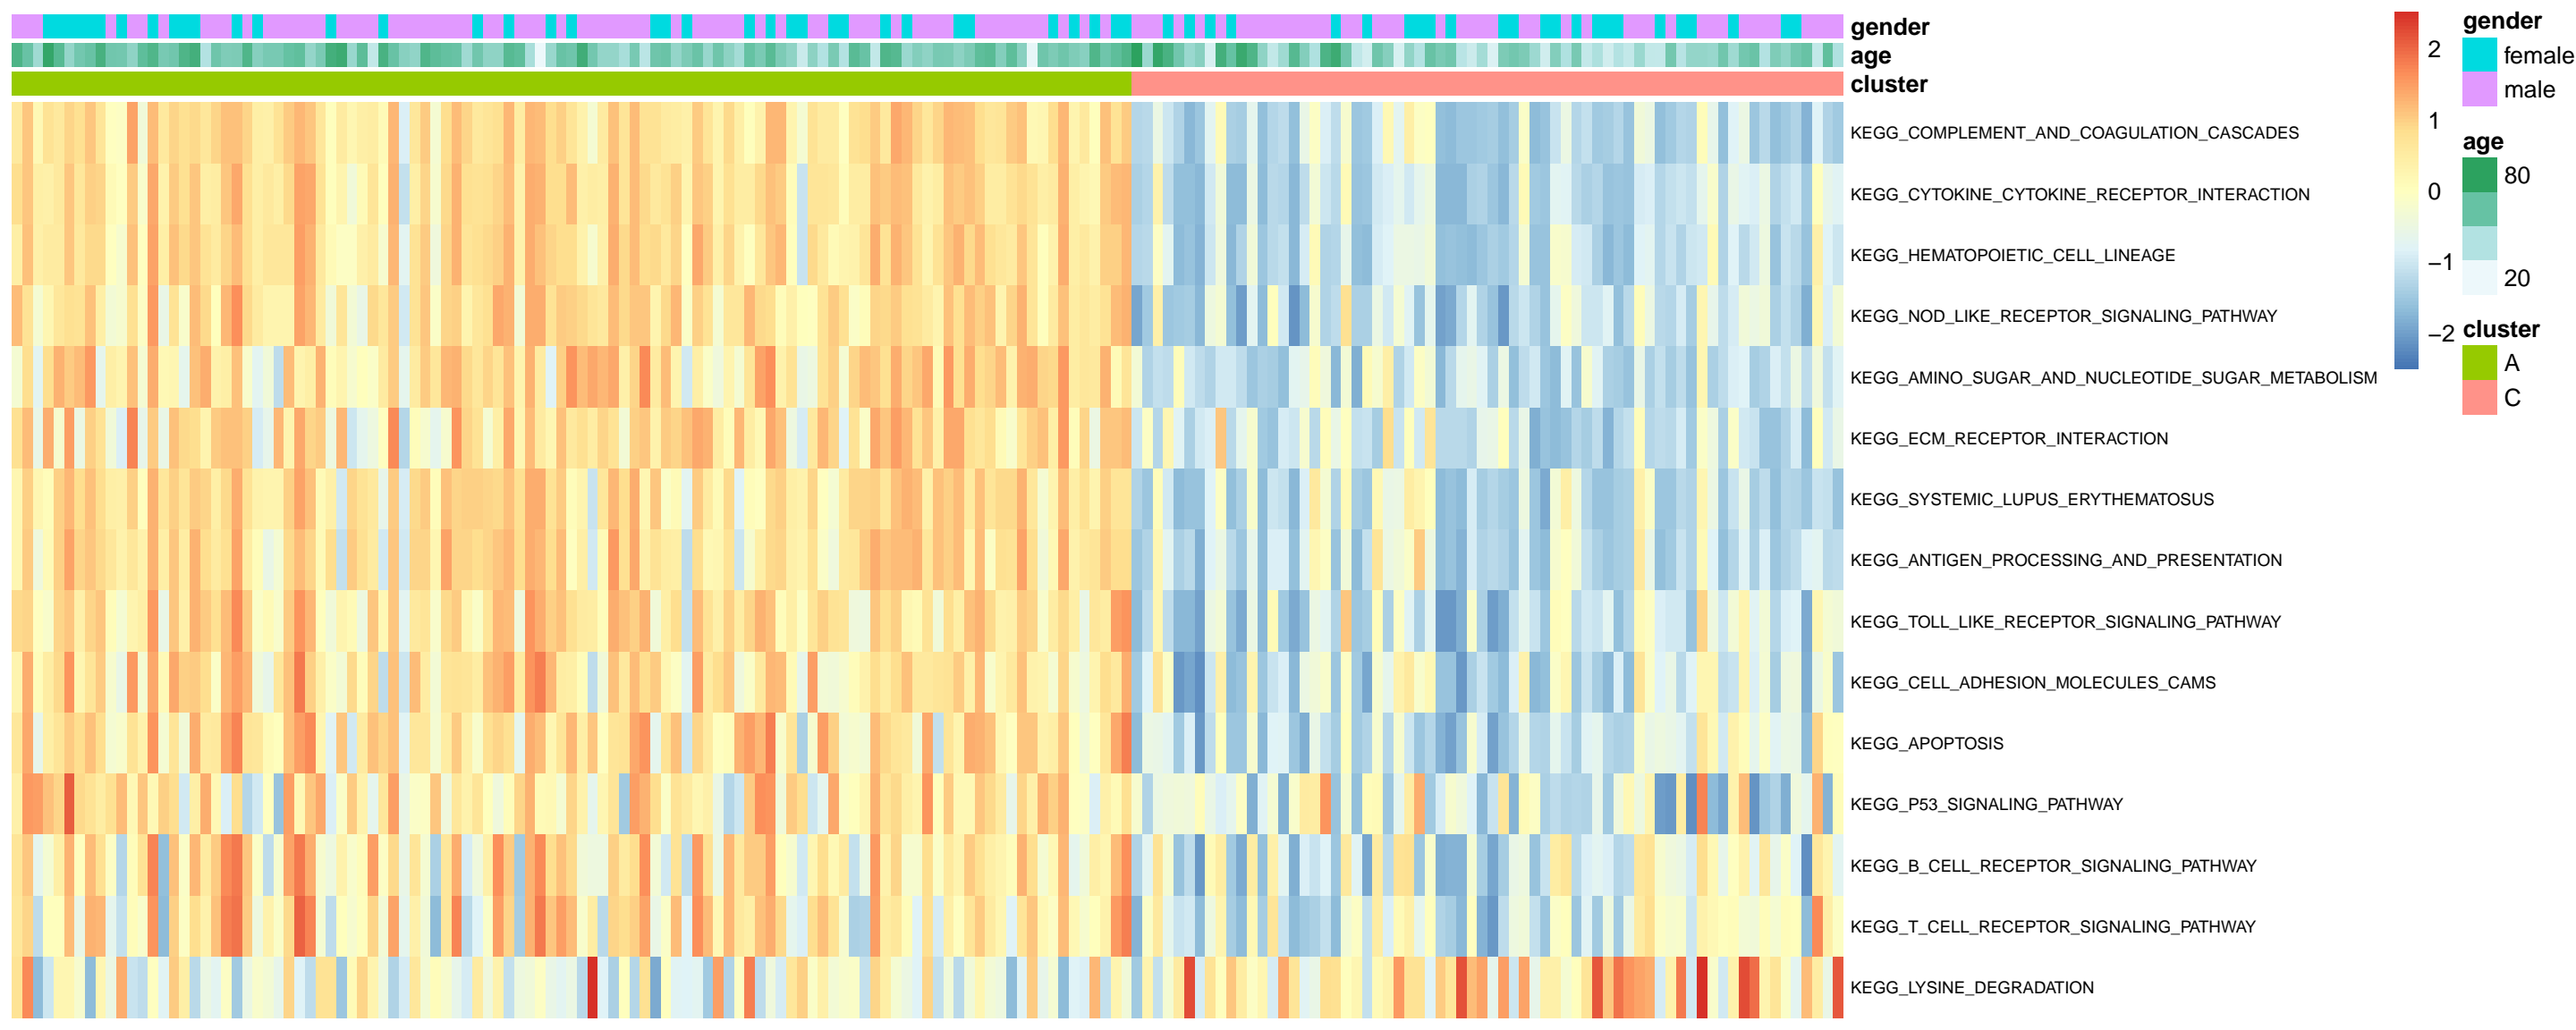

Supplement: Figure_3.zip [file Figure_3.zip]

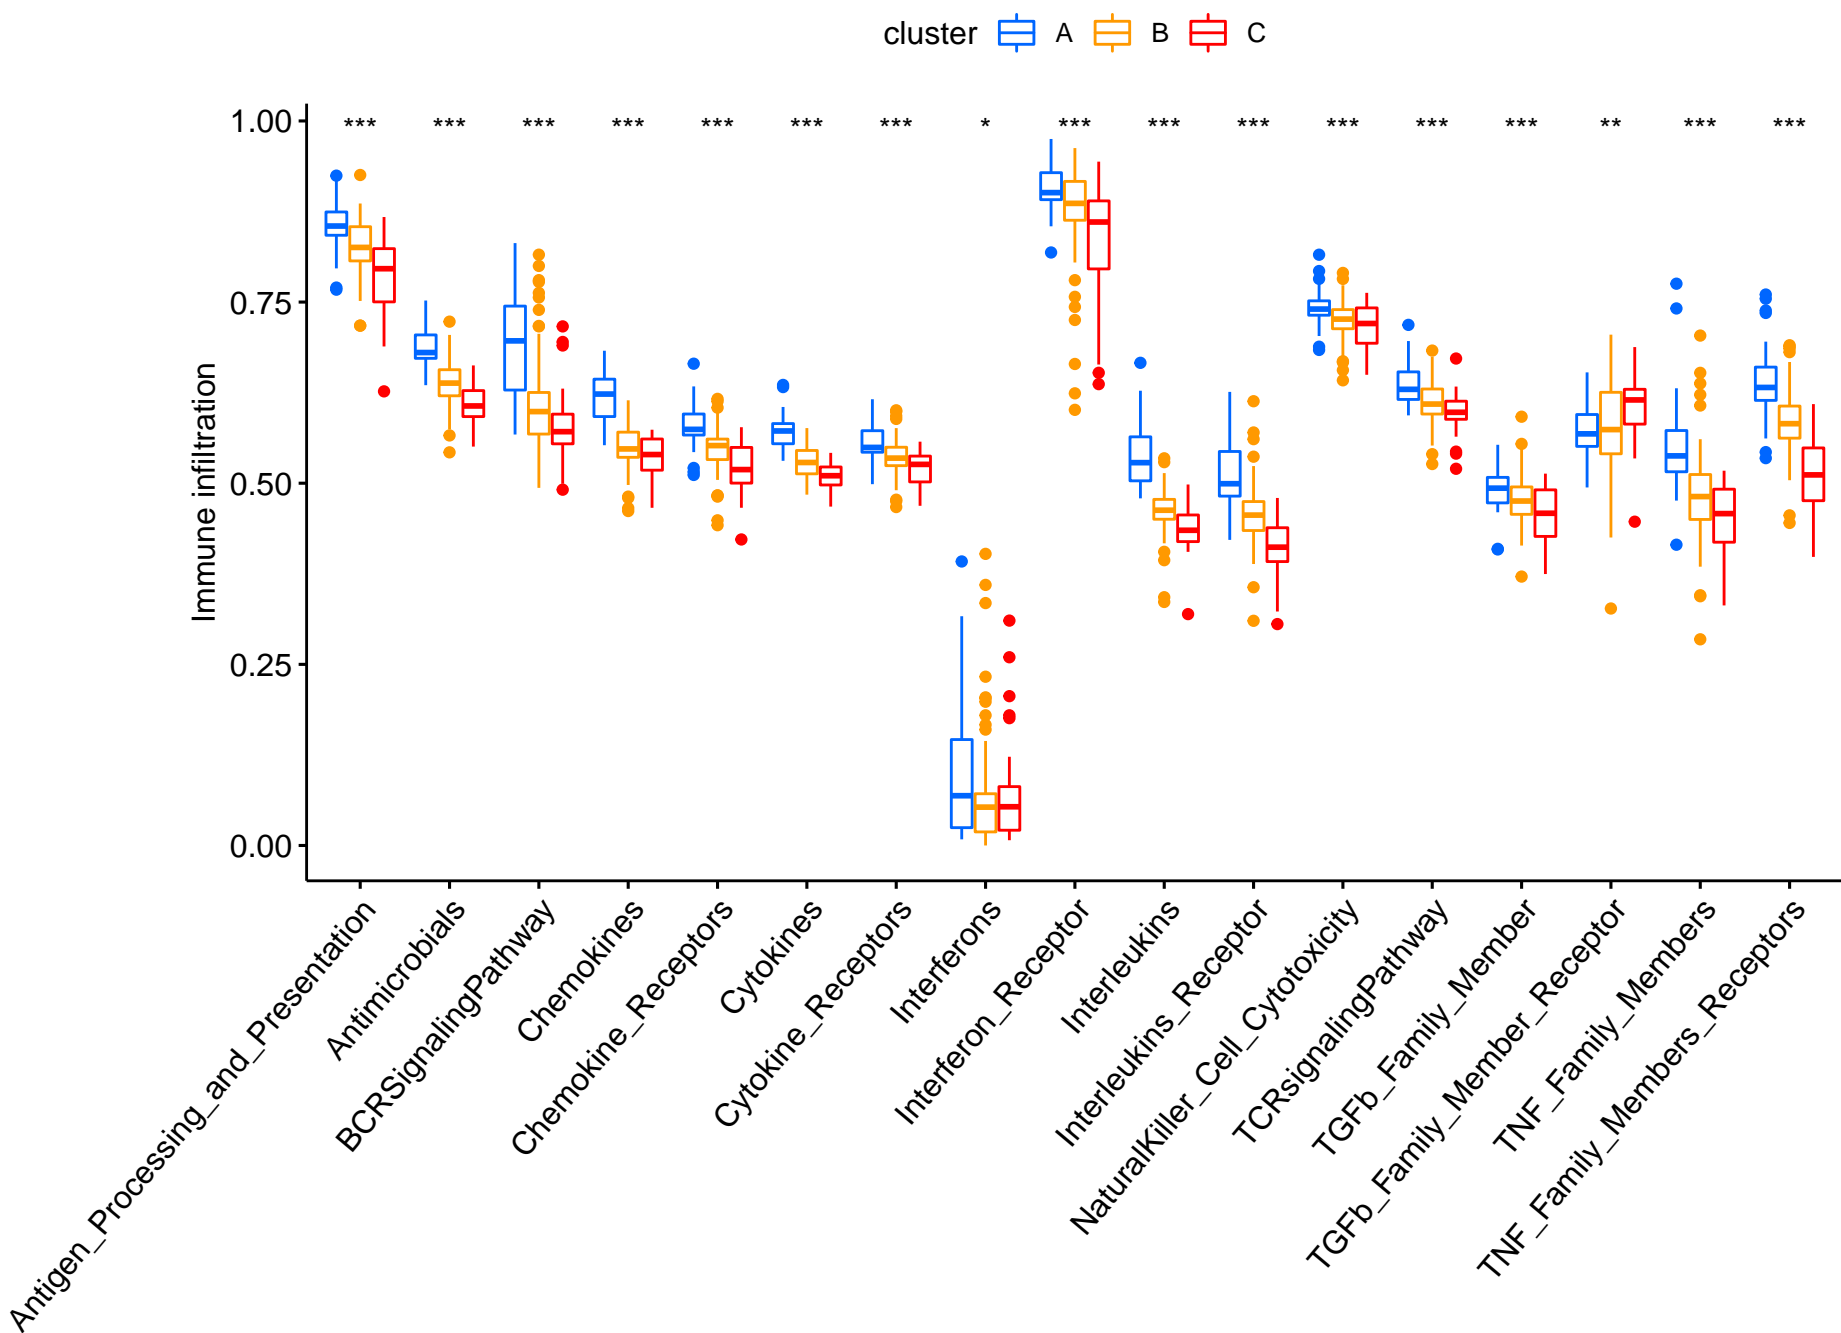

Supplement: Figure_3.zip [file Figure_3.zip]

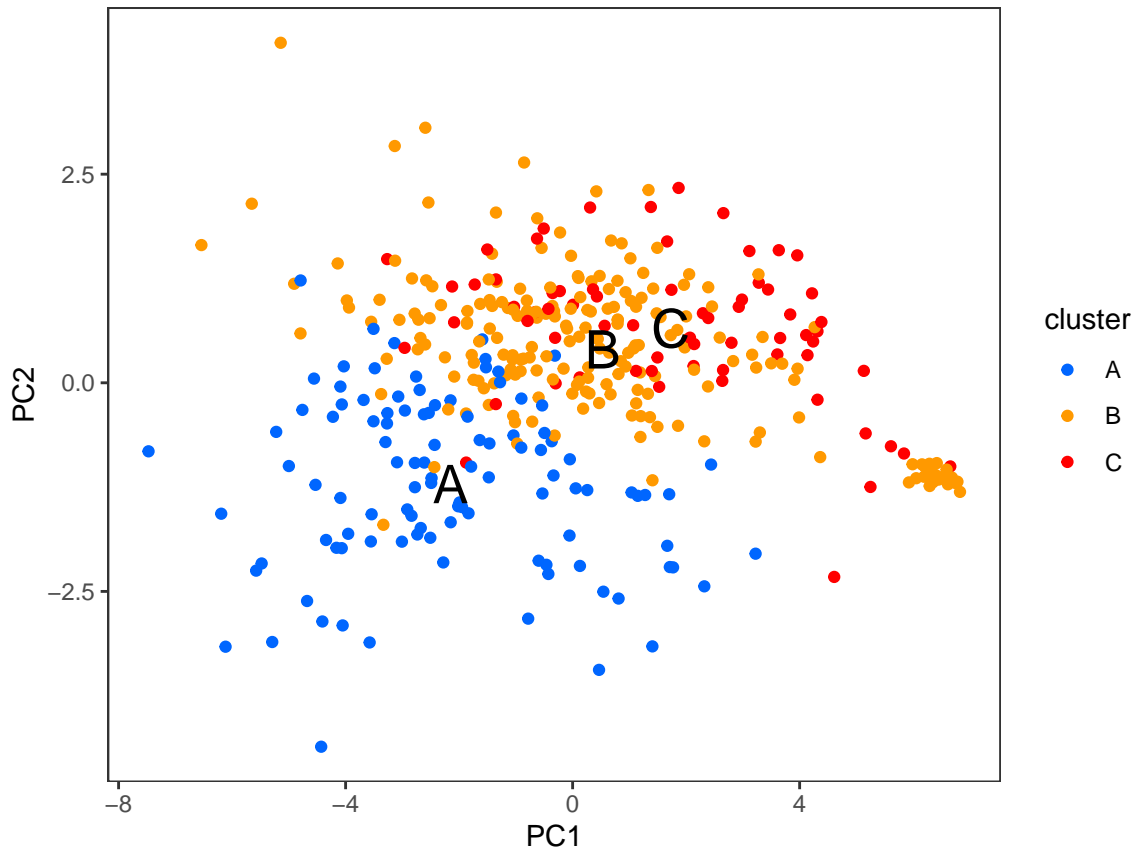

Supplement: Figure_3.zip [file Figure_3.zip]

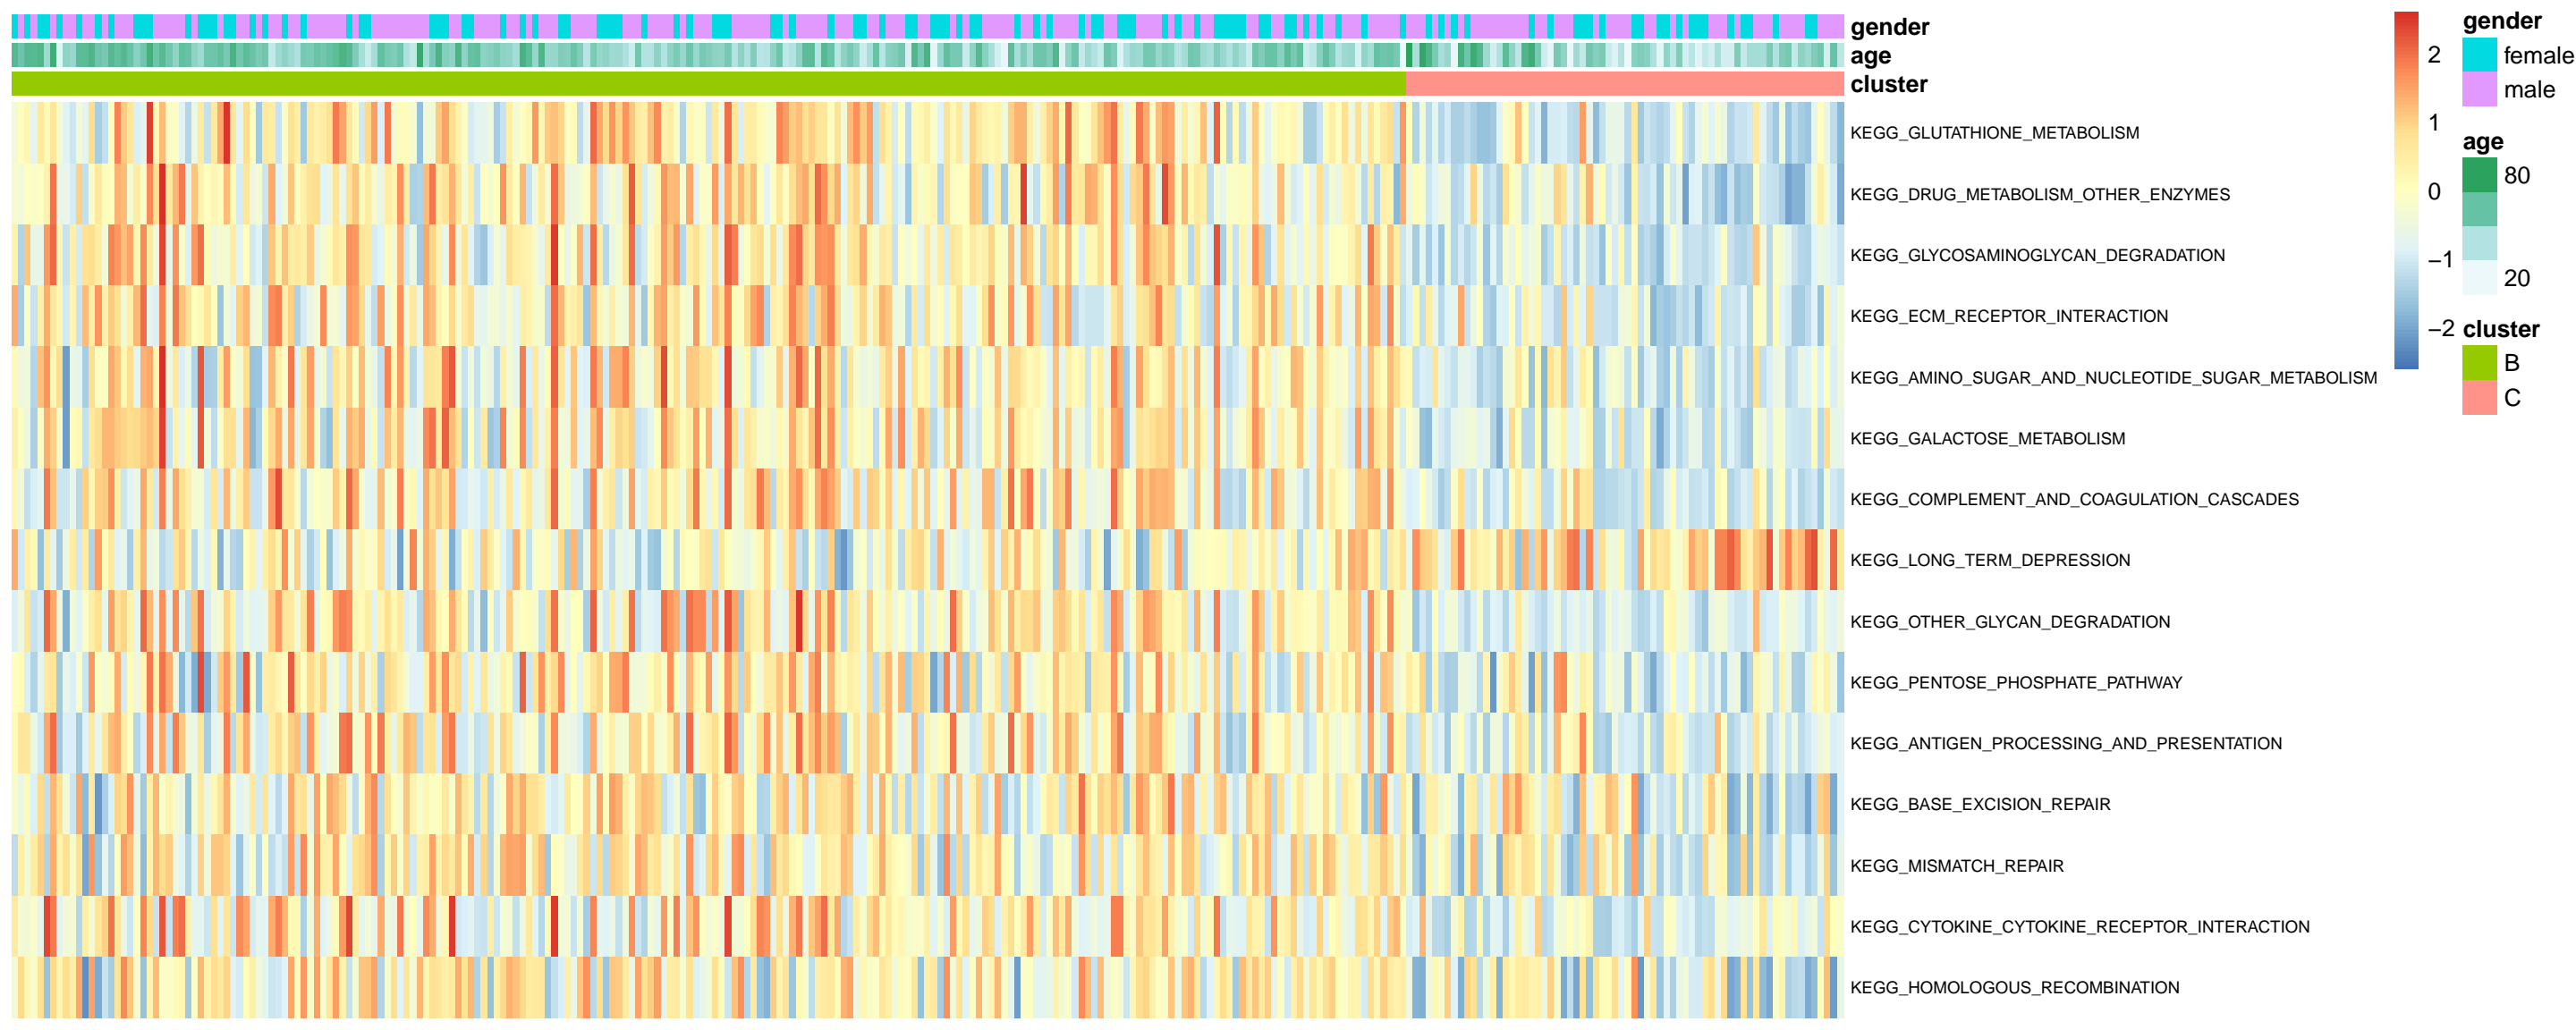

Supplement: Figure_3.zip [file Figure_3.zip]

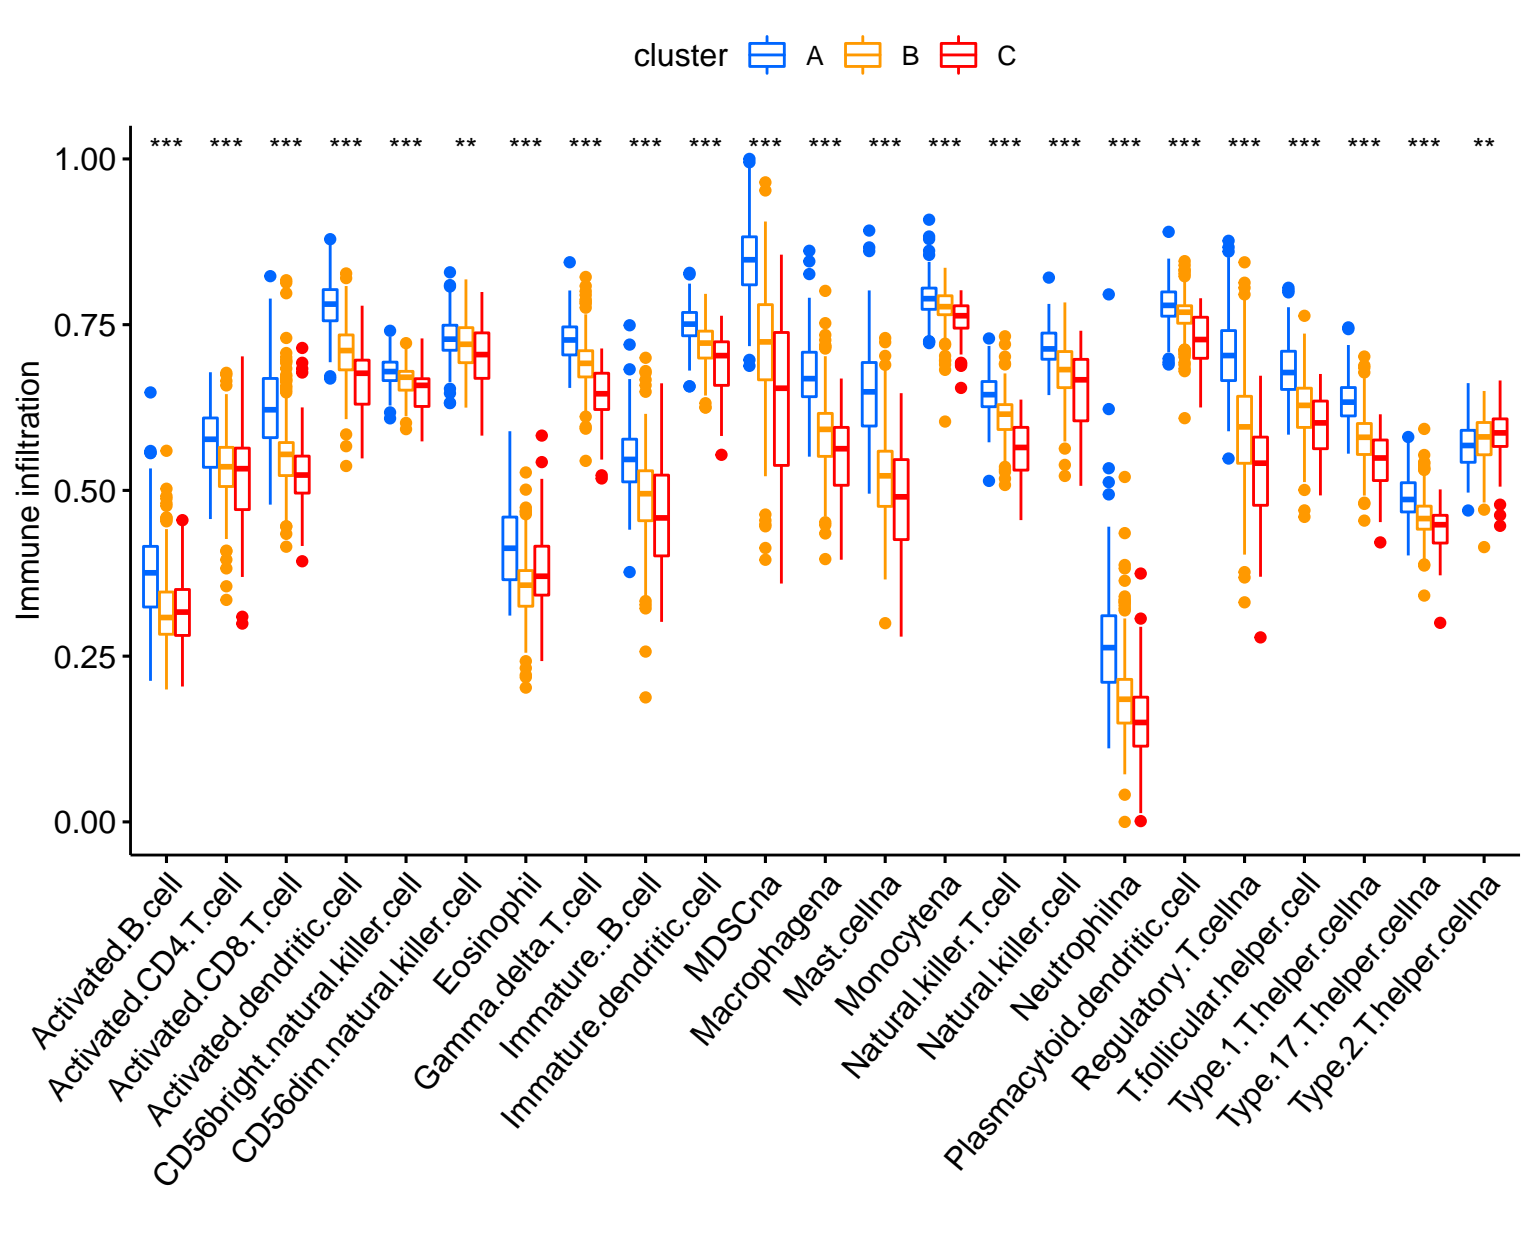

Supplement: Figure_3.zip [file Figure_3.zip]

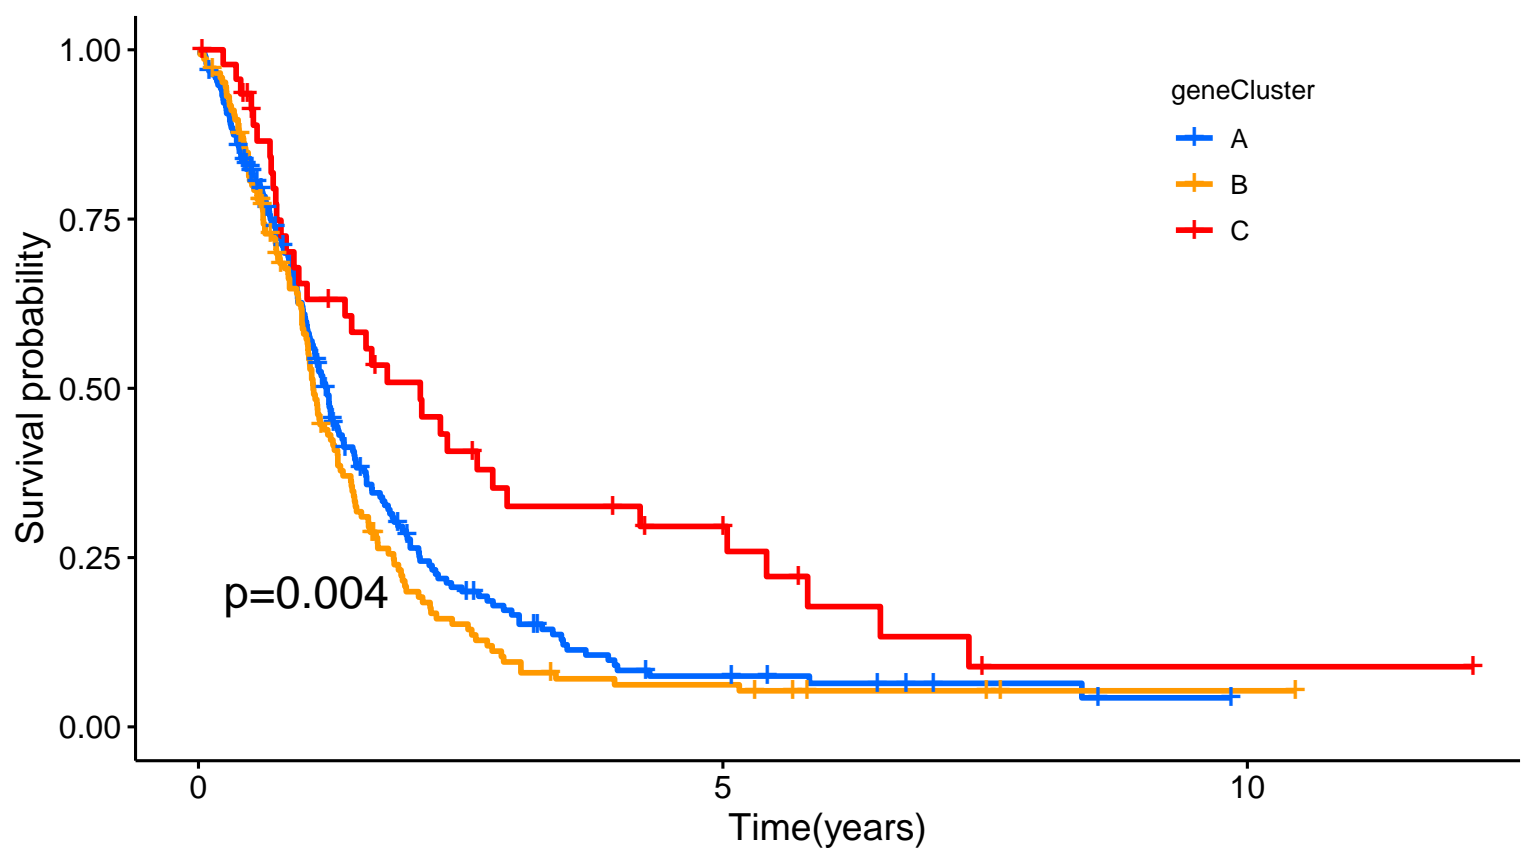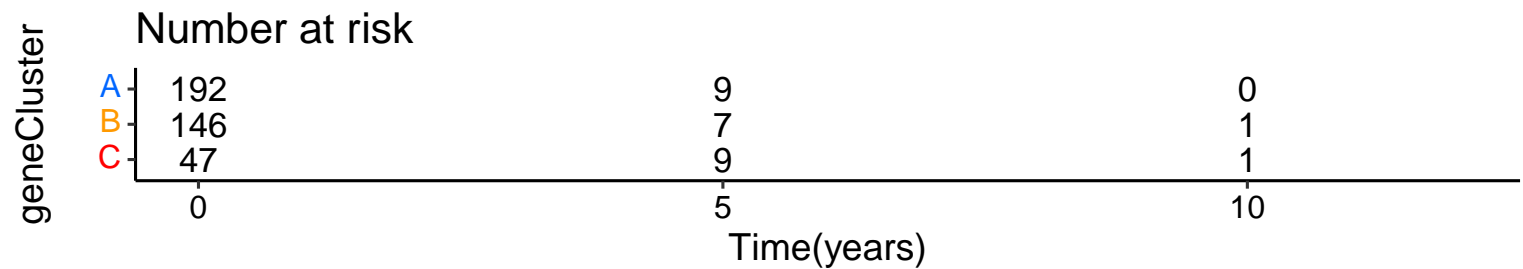

Supplement: Figure_4.zip [file Figure_4.zip]

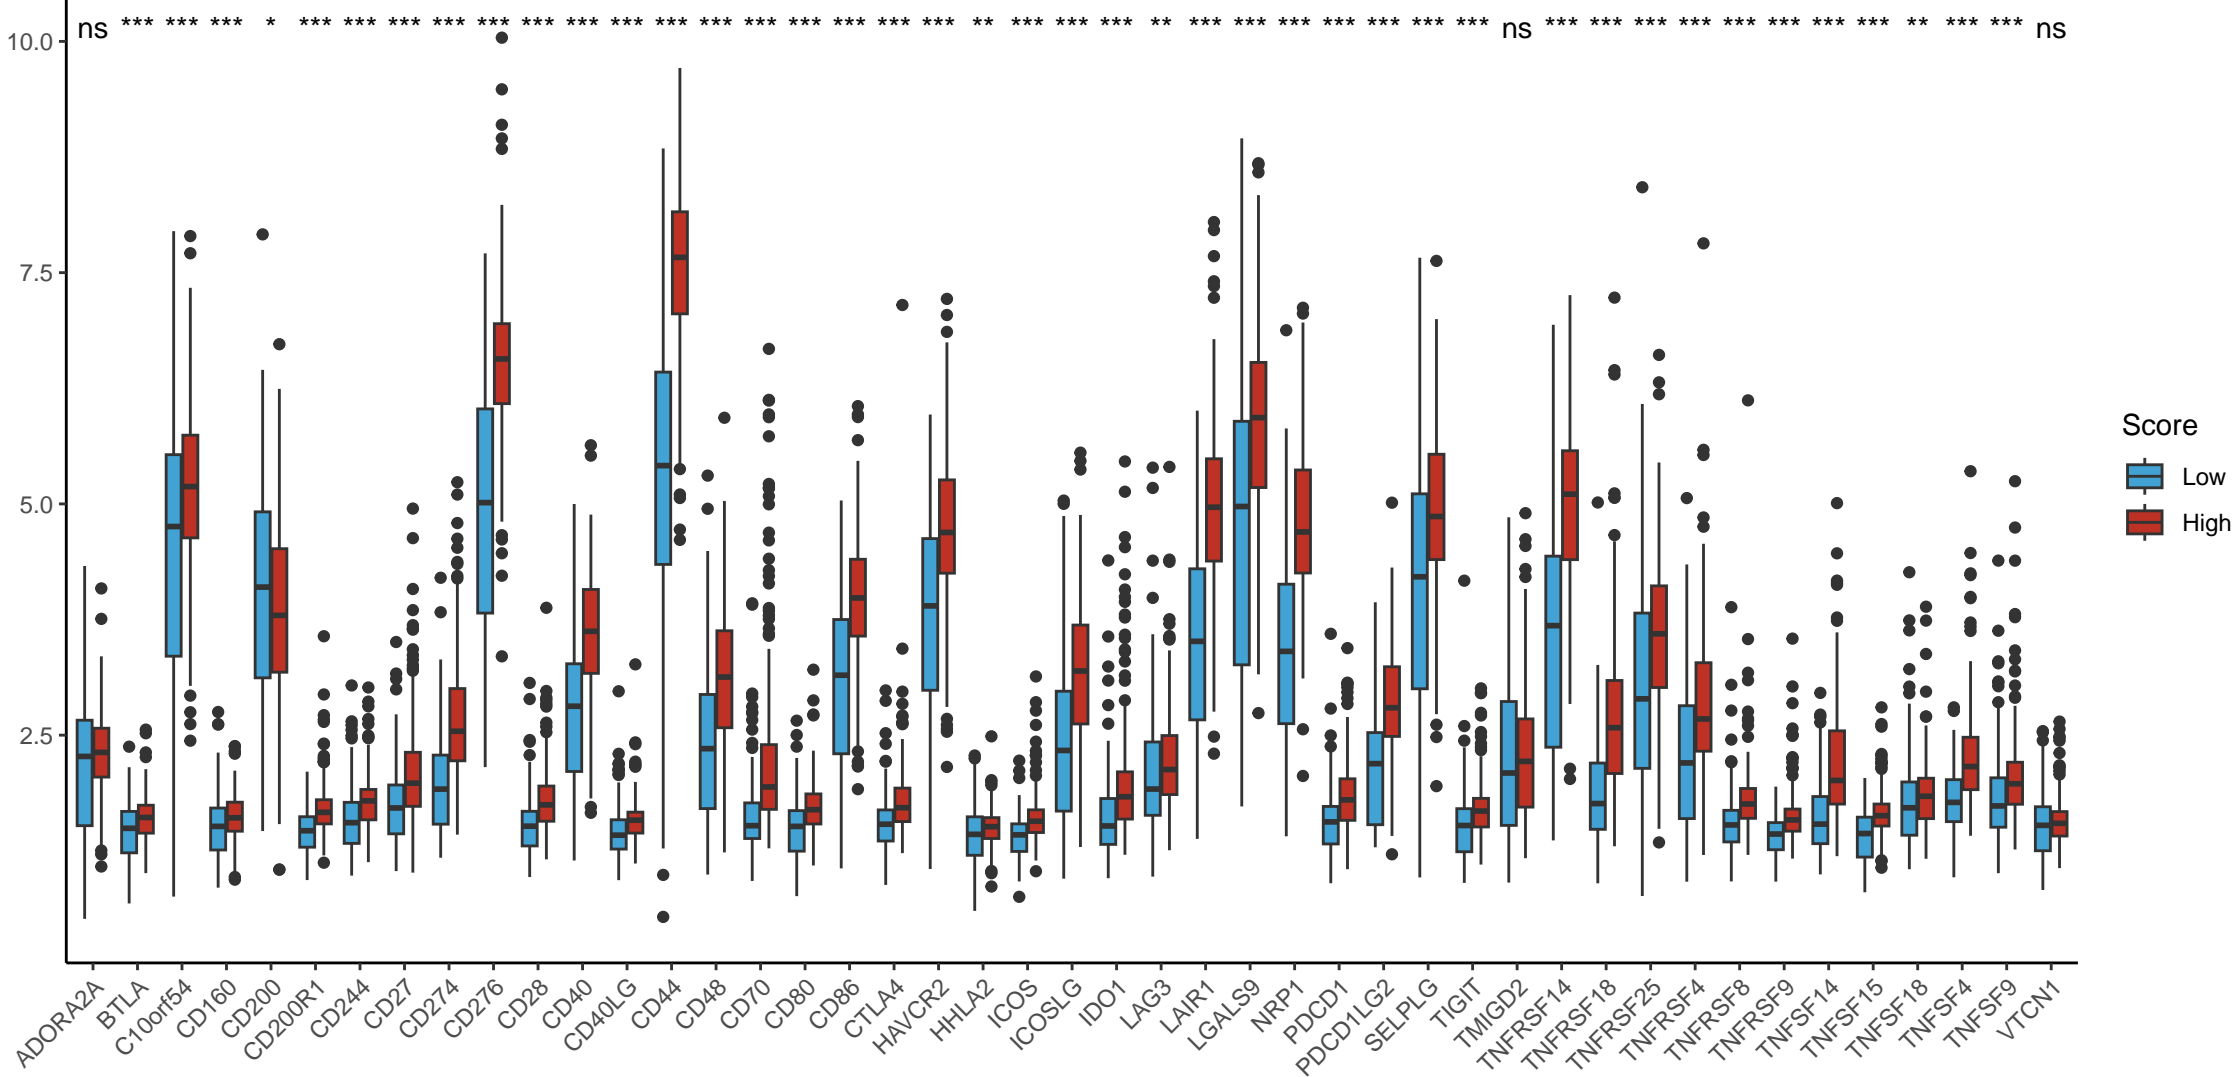

Supplement: Figure_4.zip [file Figure_4.zip]

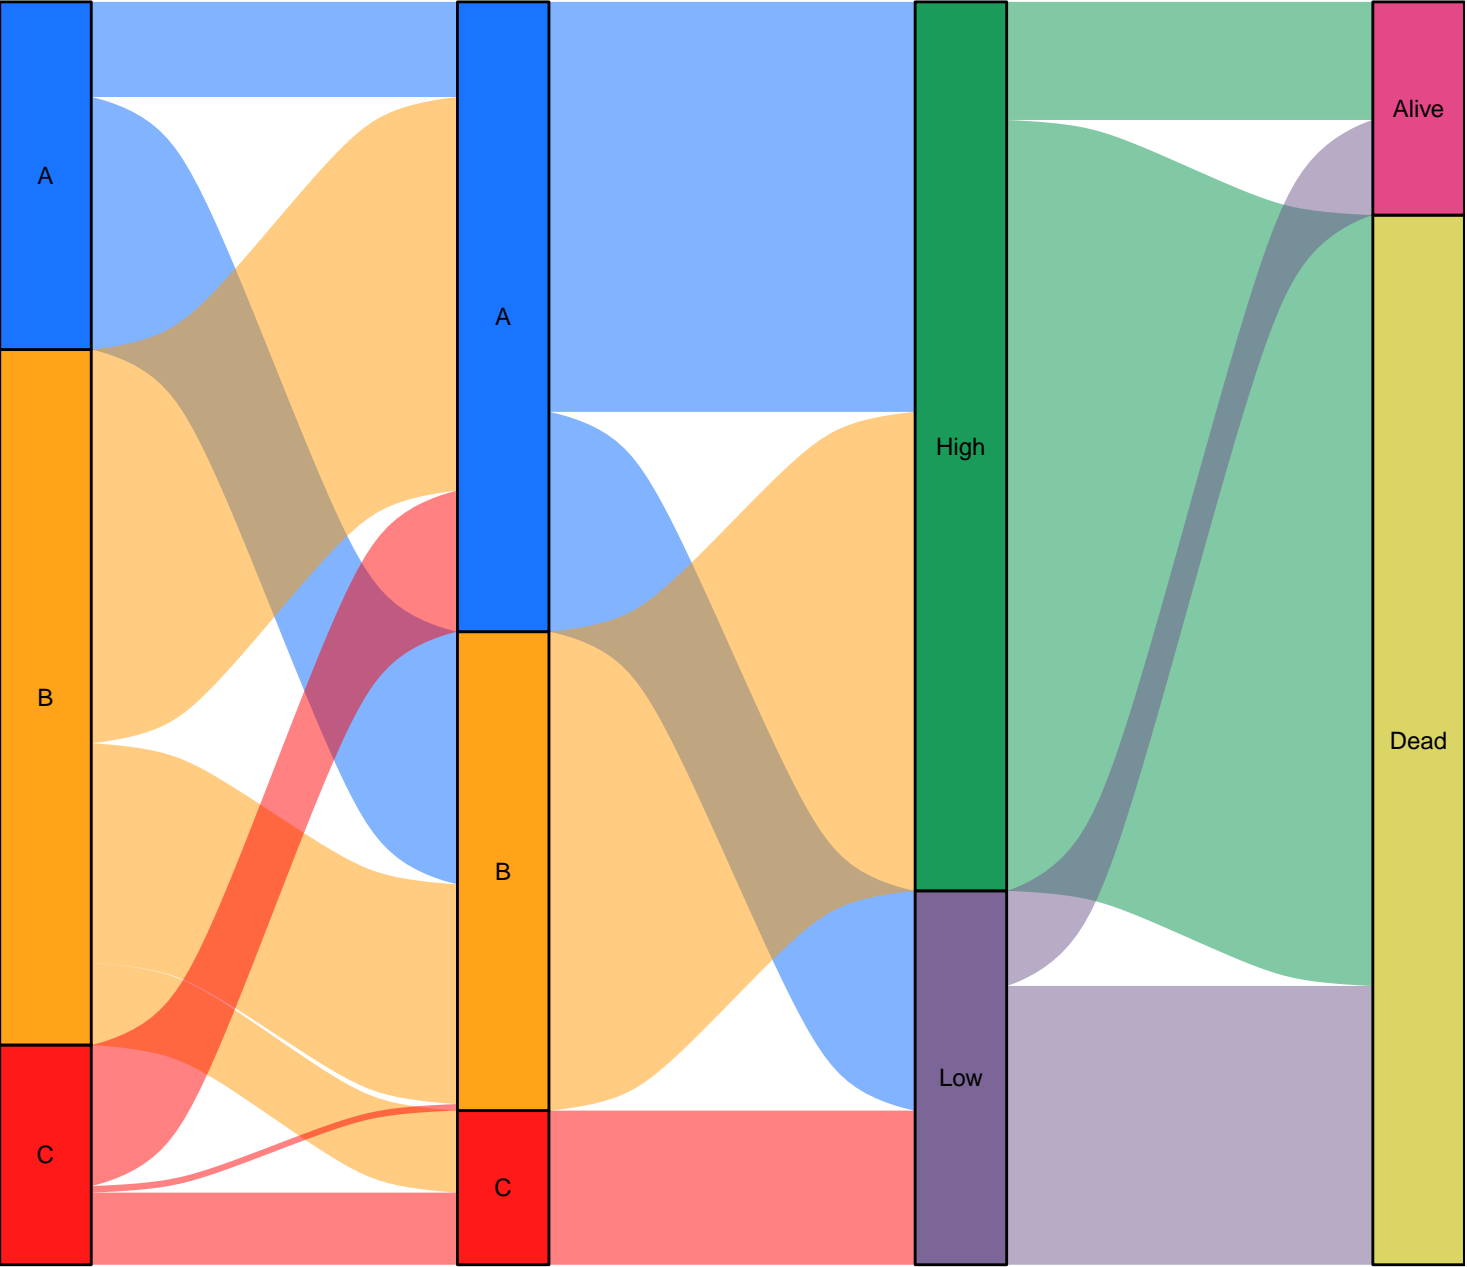

Cluster

geneCluster

Score

fustat

Supplement: Figure_4.zip [file Figure_4.zip]

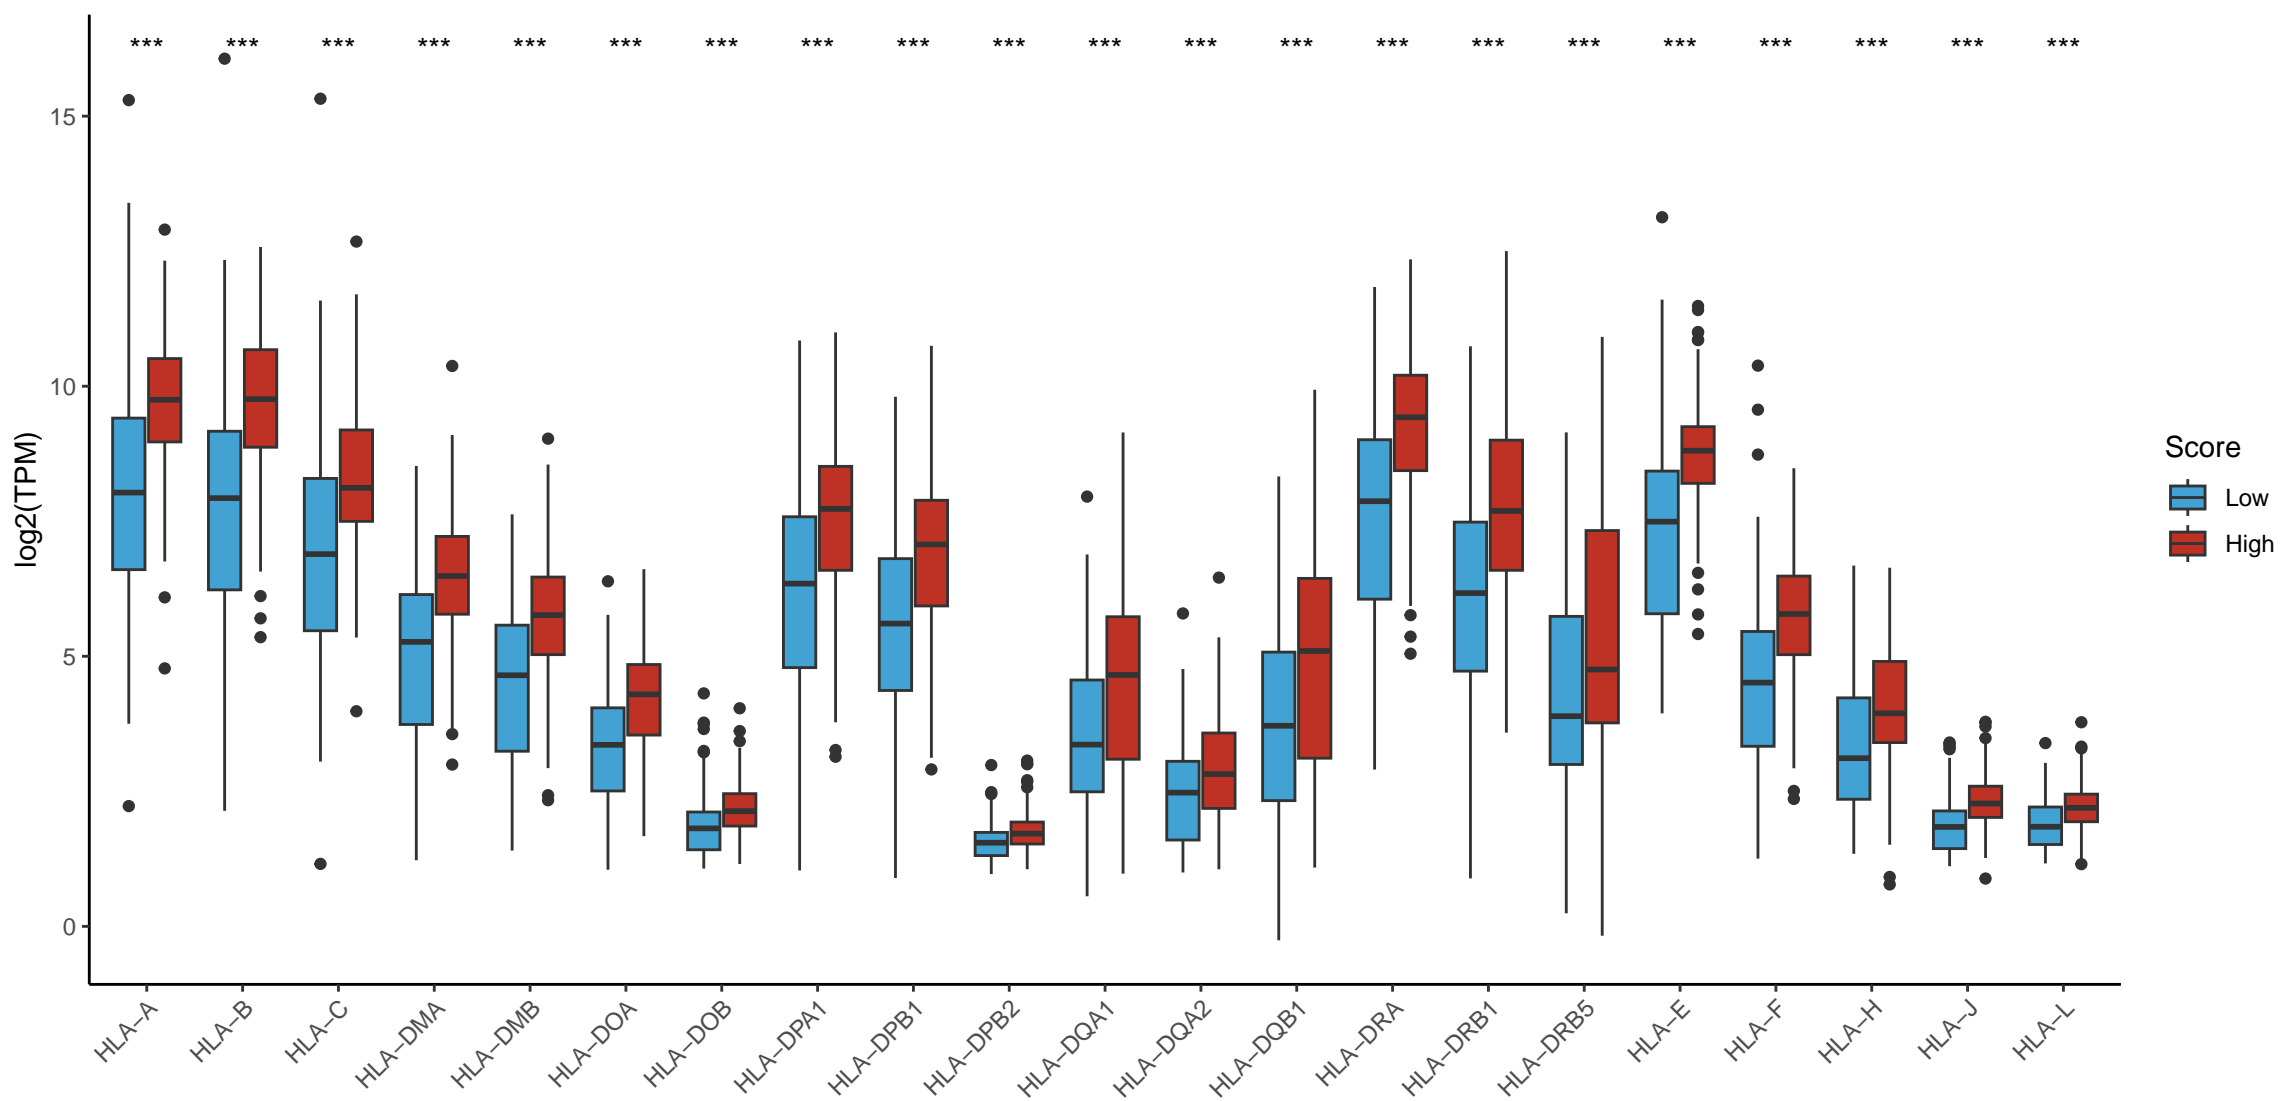

Supplement: Figure_4.zip [file Figure_4.zip]

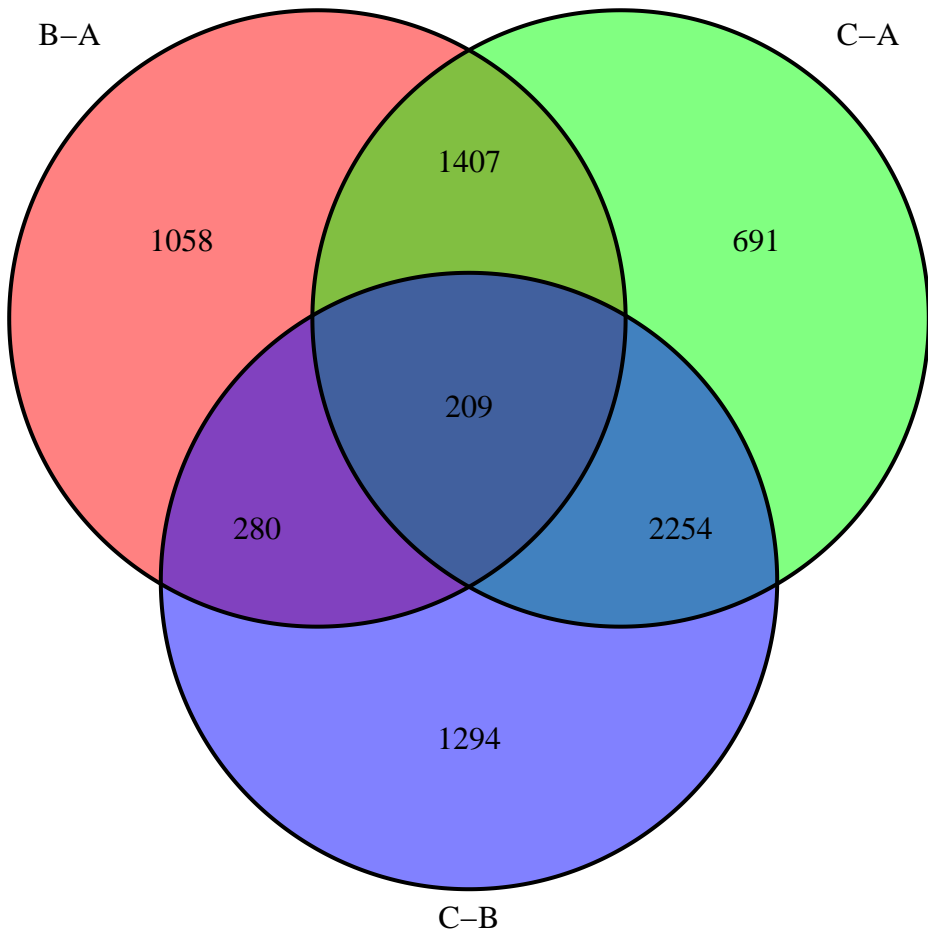

Supplement: Figure_4.zip [file Figure_4.zip]

Cluster  A  B  C

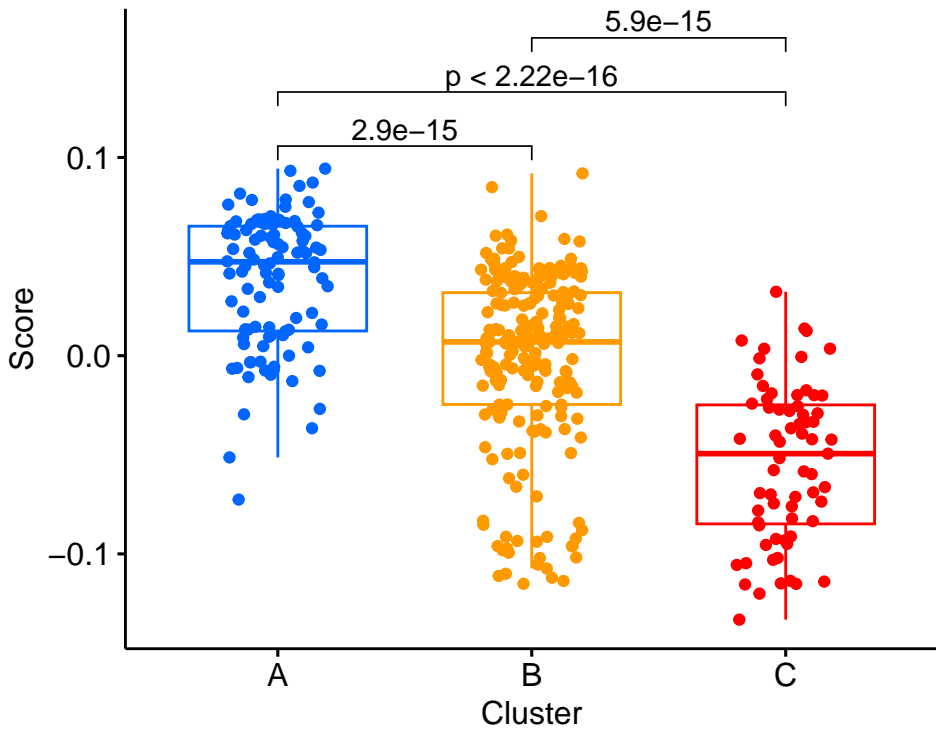

Supplement: Figure_4.zip [file Figure_4.zip]

geneCluster     A     B     C

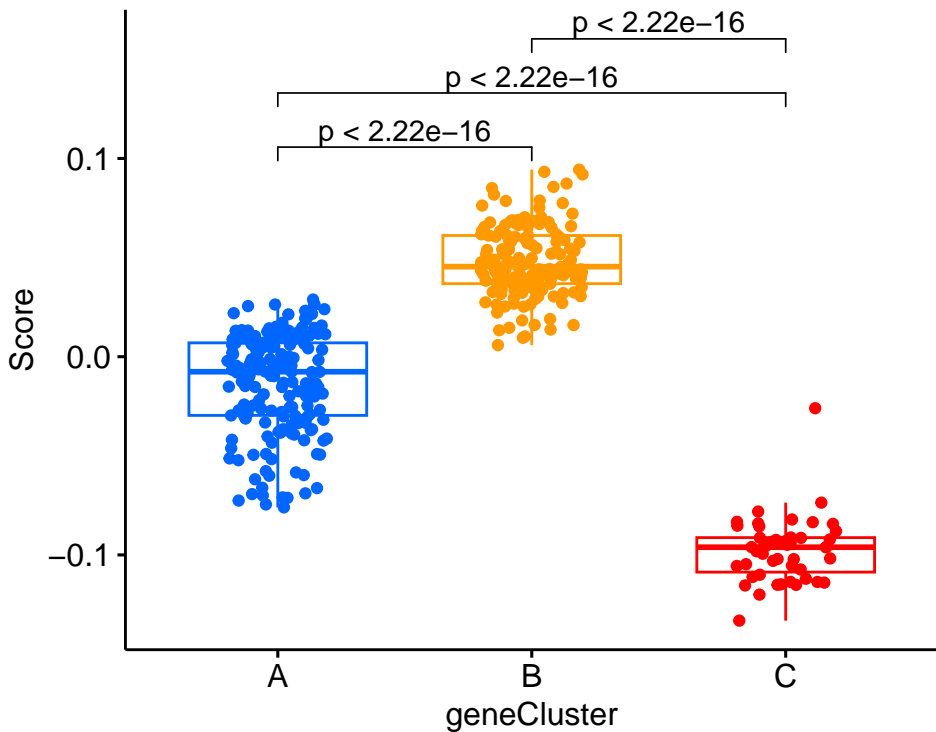

Supplement: Figure_4.zip [file Figure_4.zip]

Nutlin.3a

Low score

High score

$p = 0.0045$

2

3

4

5

6

7

IC50

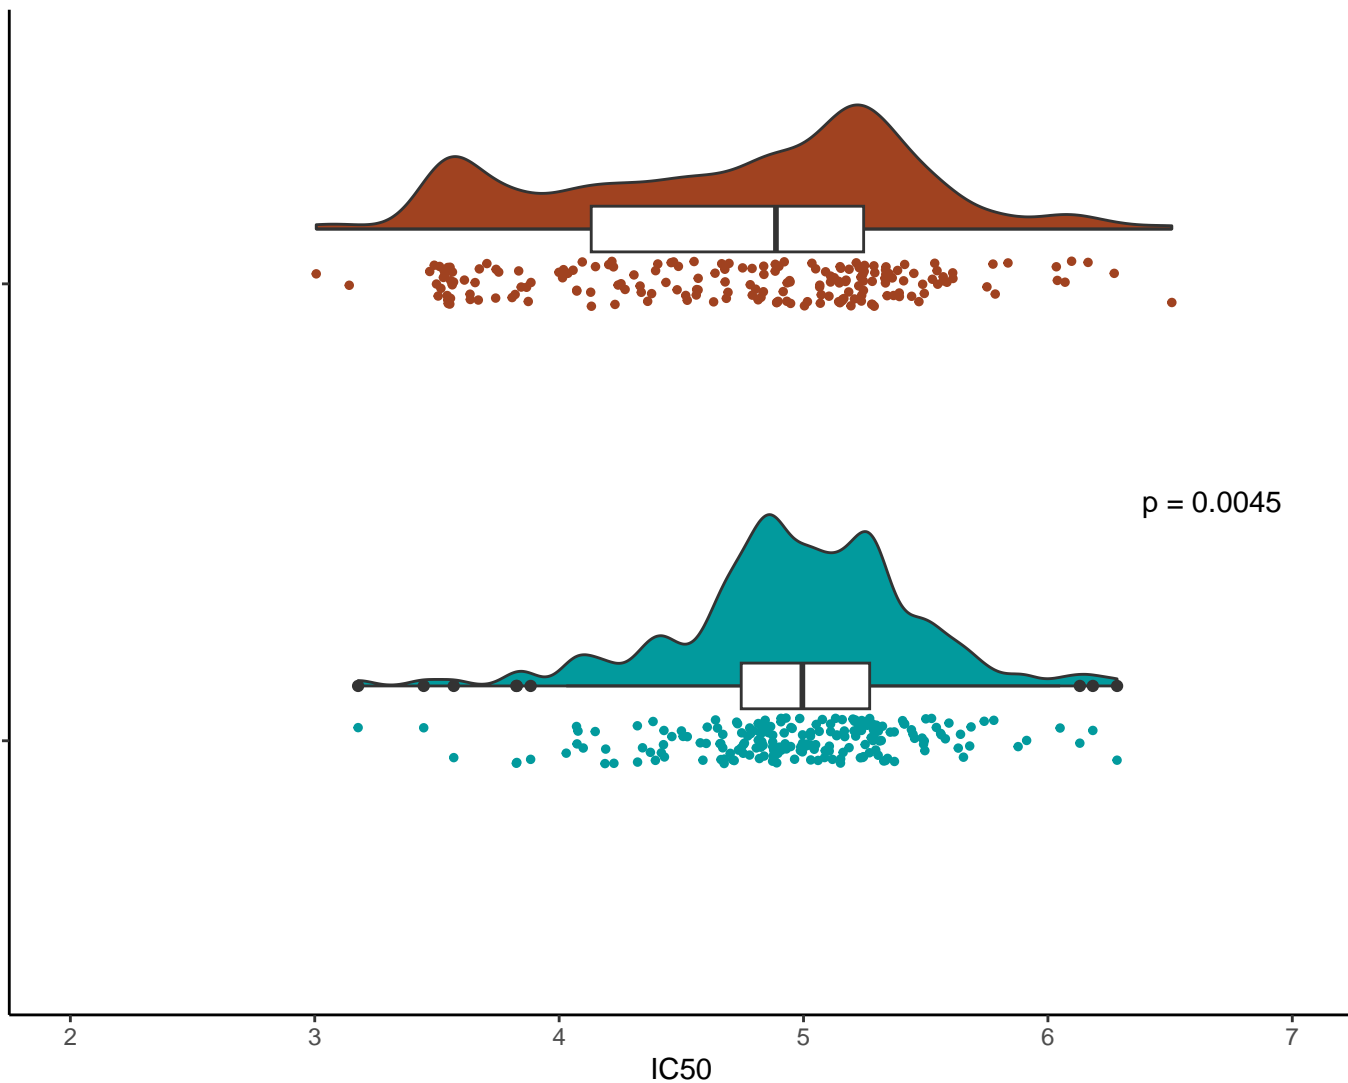

Supplement: Figure_5.zip [file Figure_5.zip]

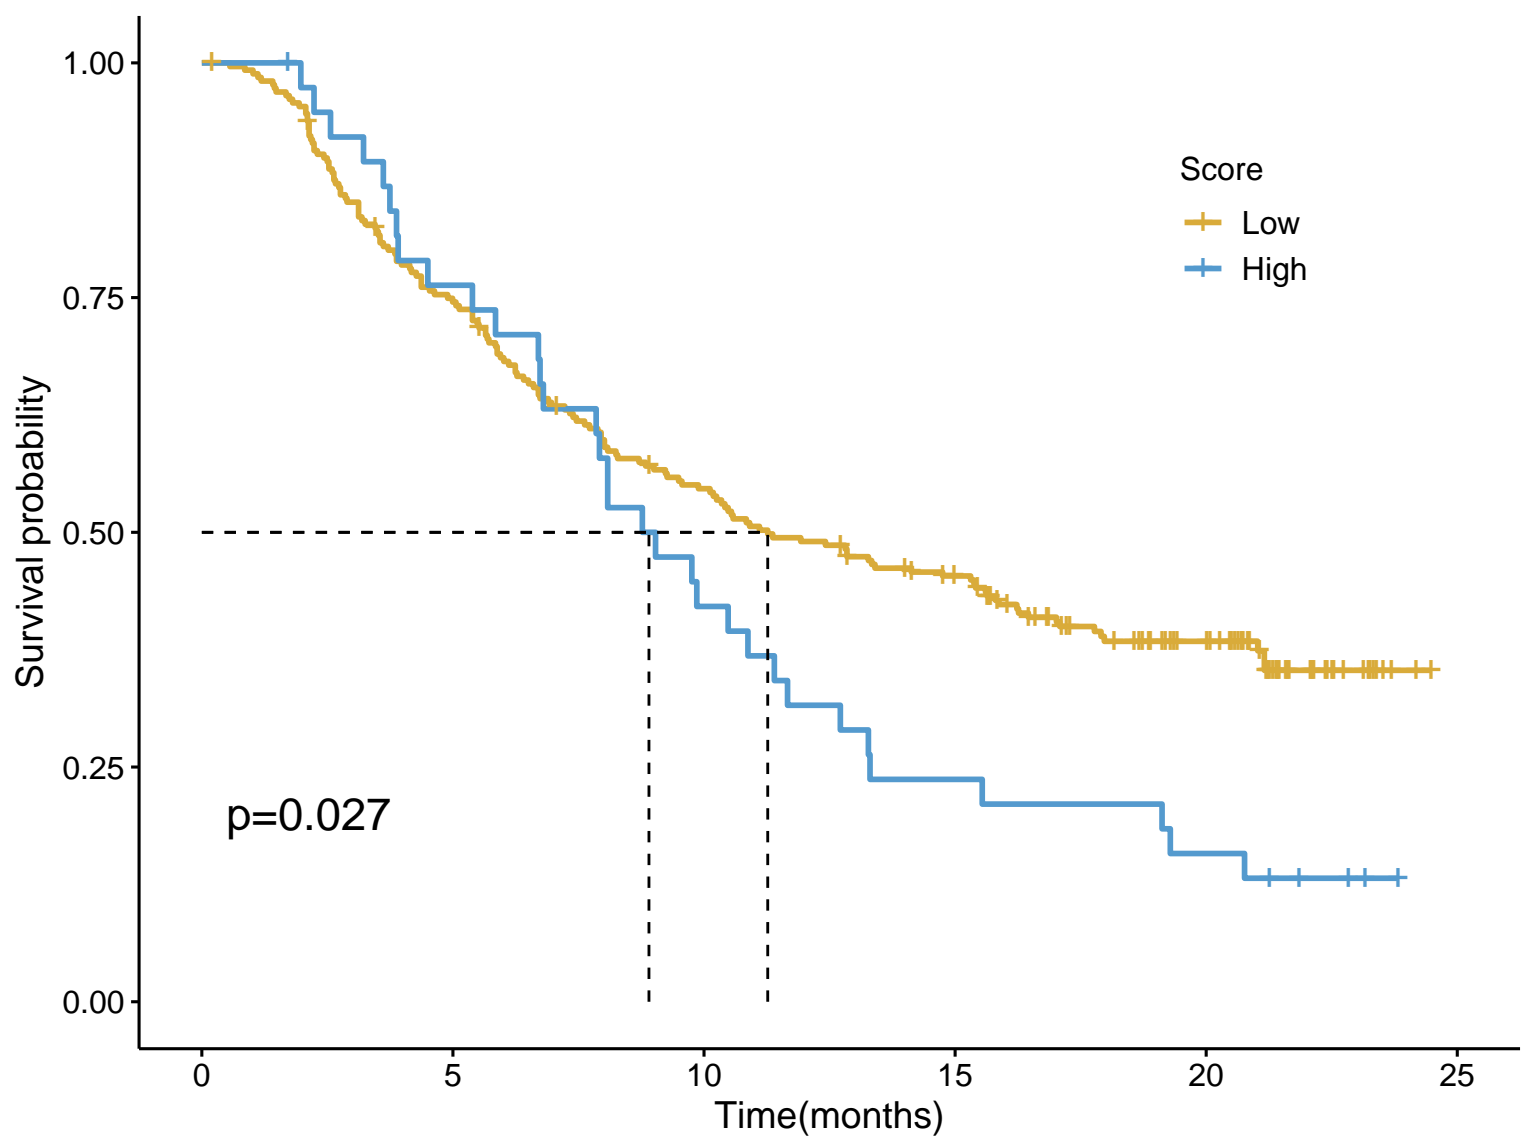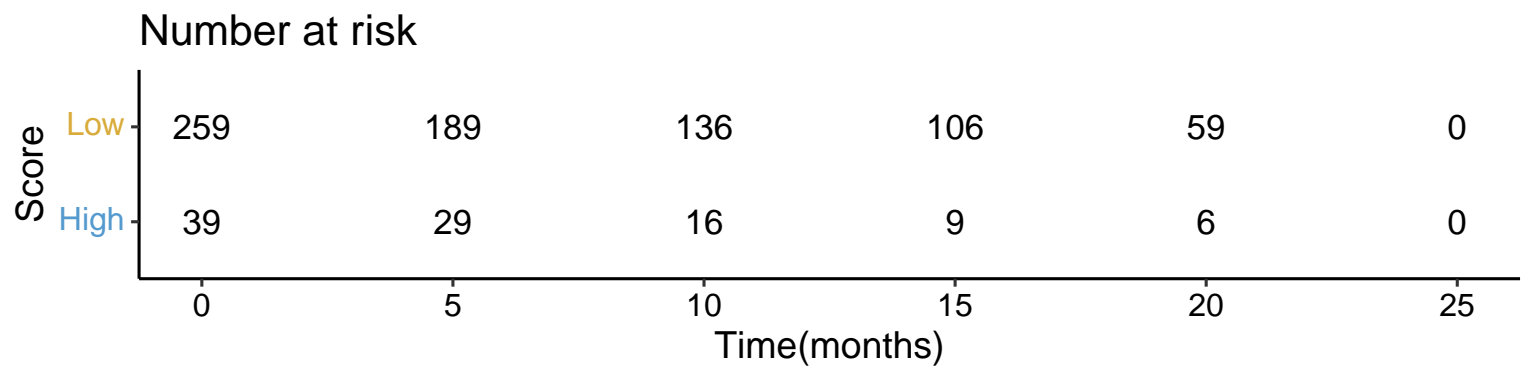

Supplement: Figure_5.zip [file Figure_5.zip]

BX.795

Low score

High score

p = 0.0025

0

1

2

3

4

IC50

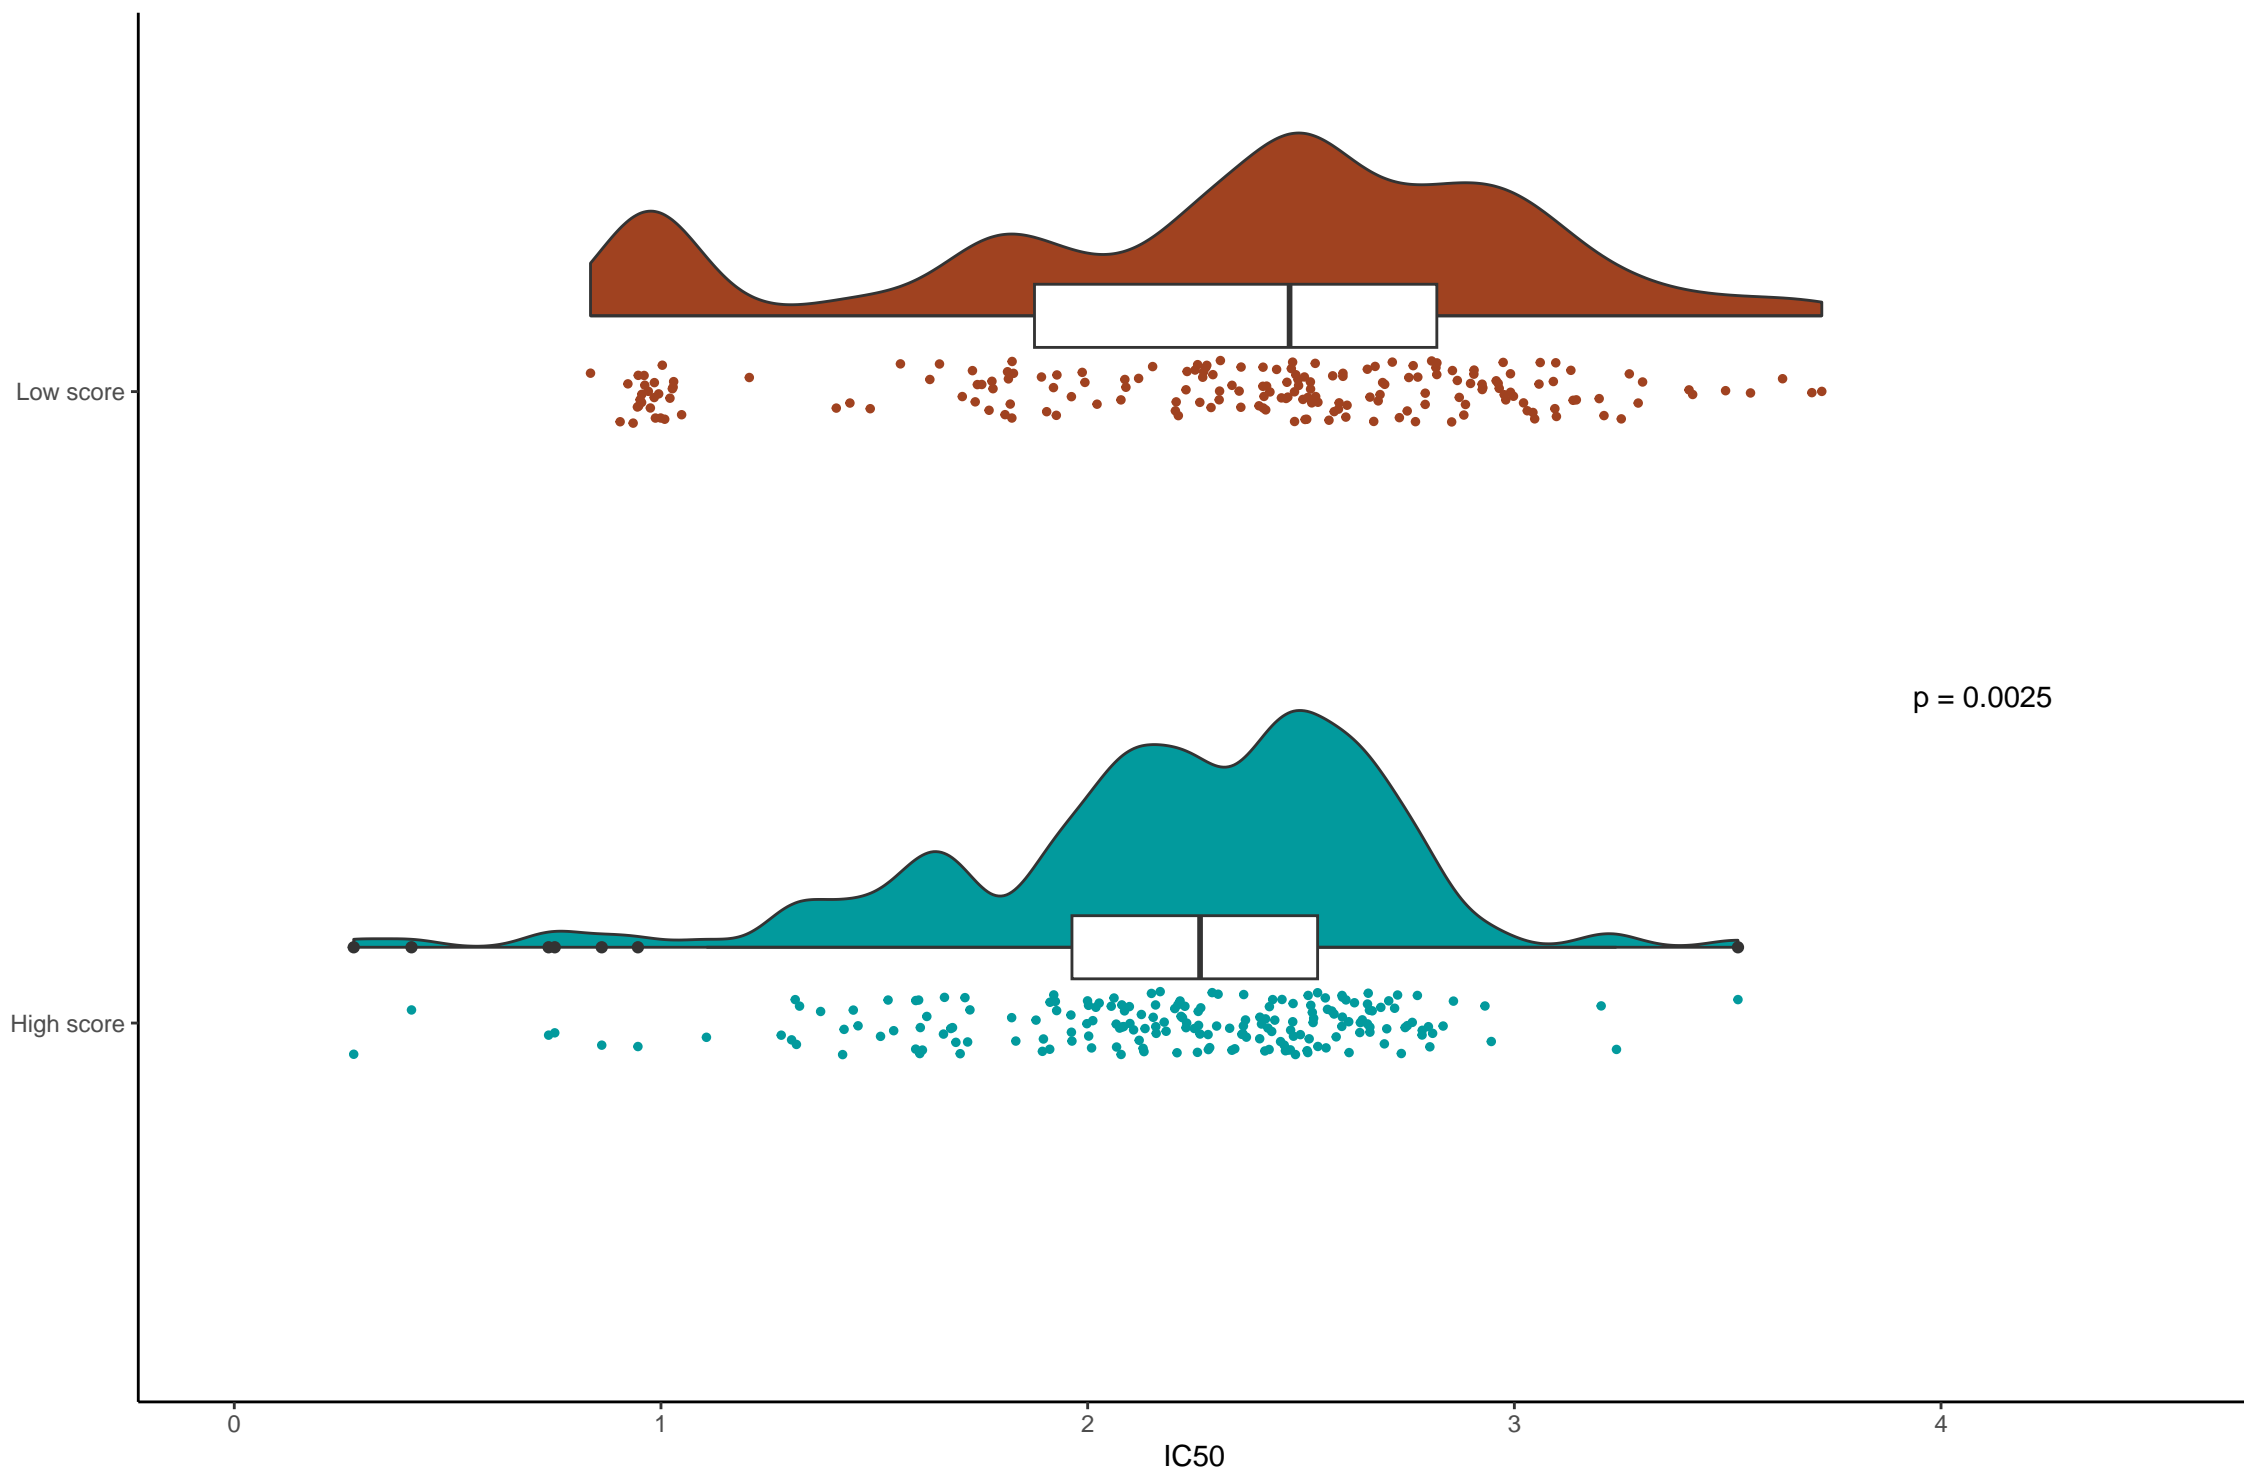

Supplement: Figure_5.zip [file Figure_5.zip]

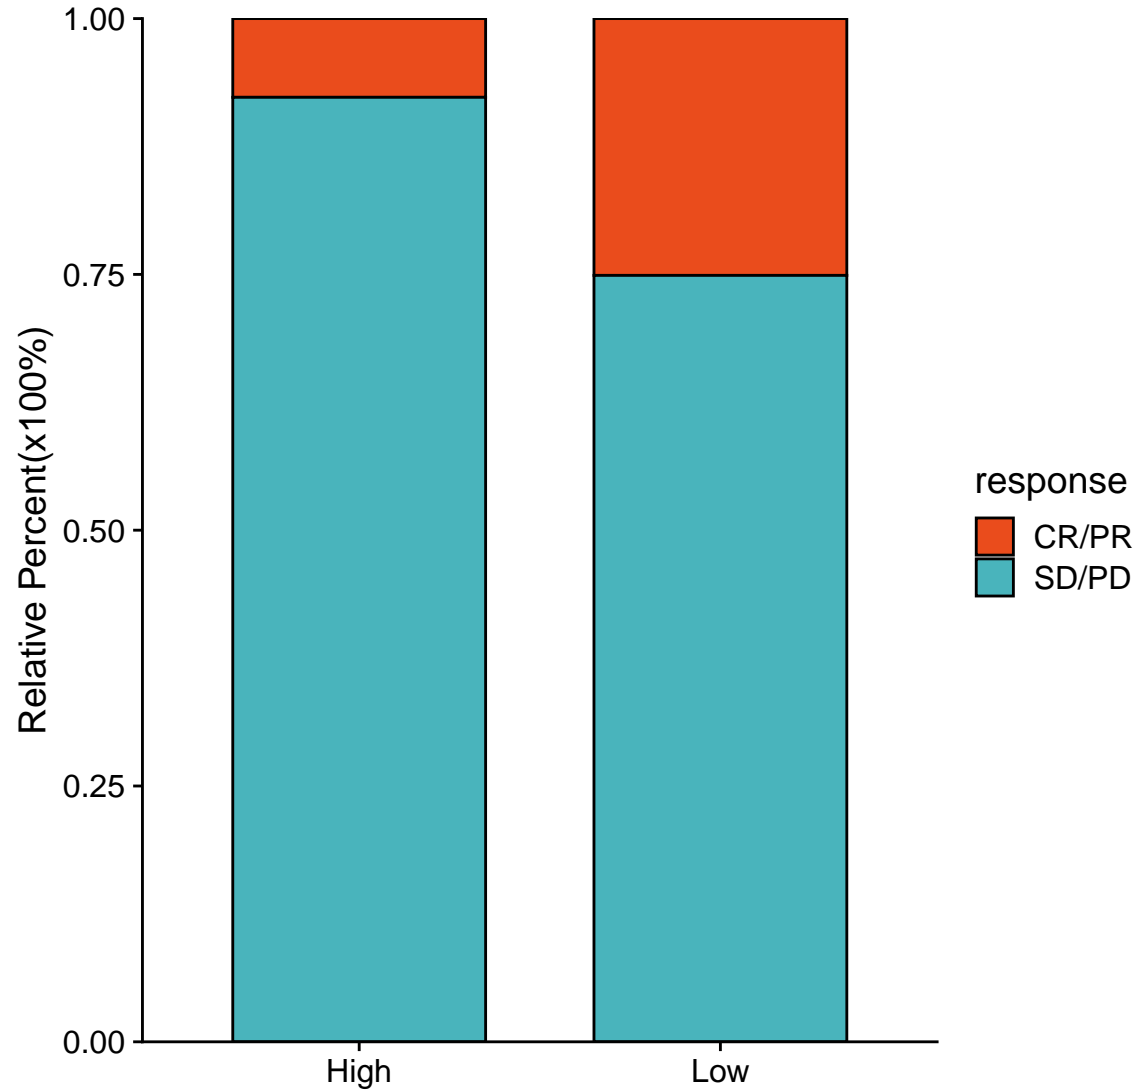

Supplement: Figure_5.zip [file Figure_5.zip]

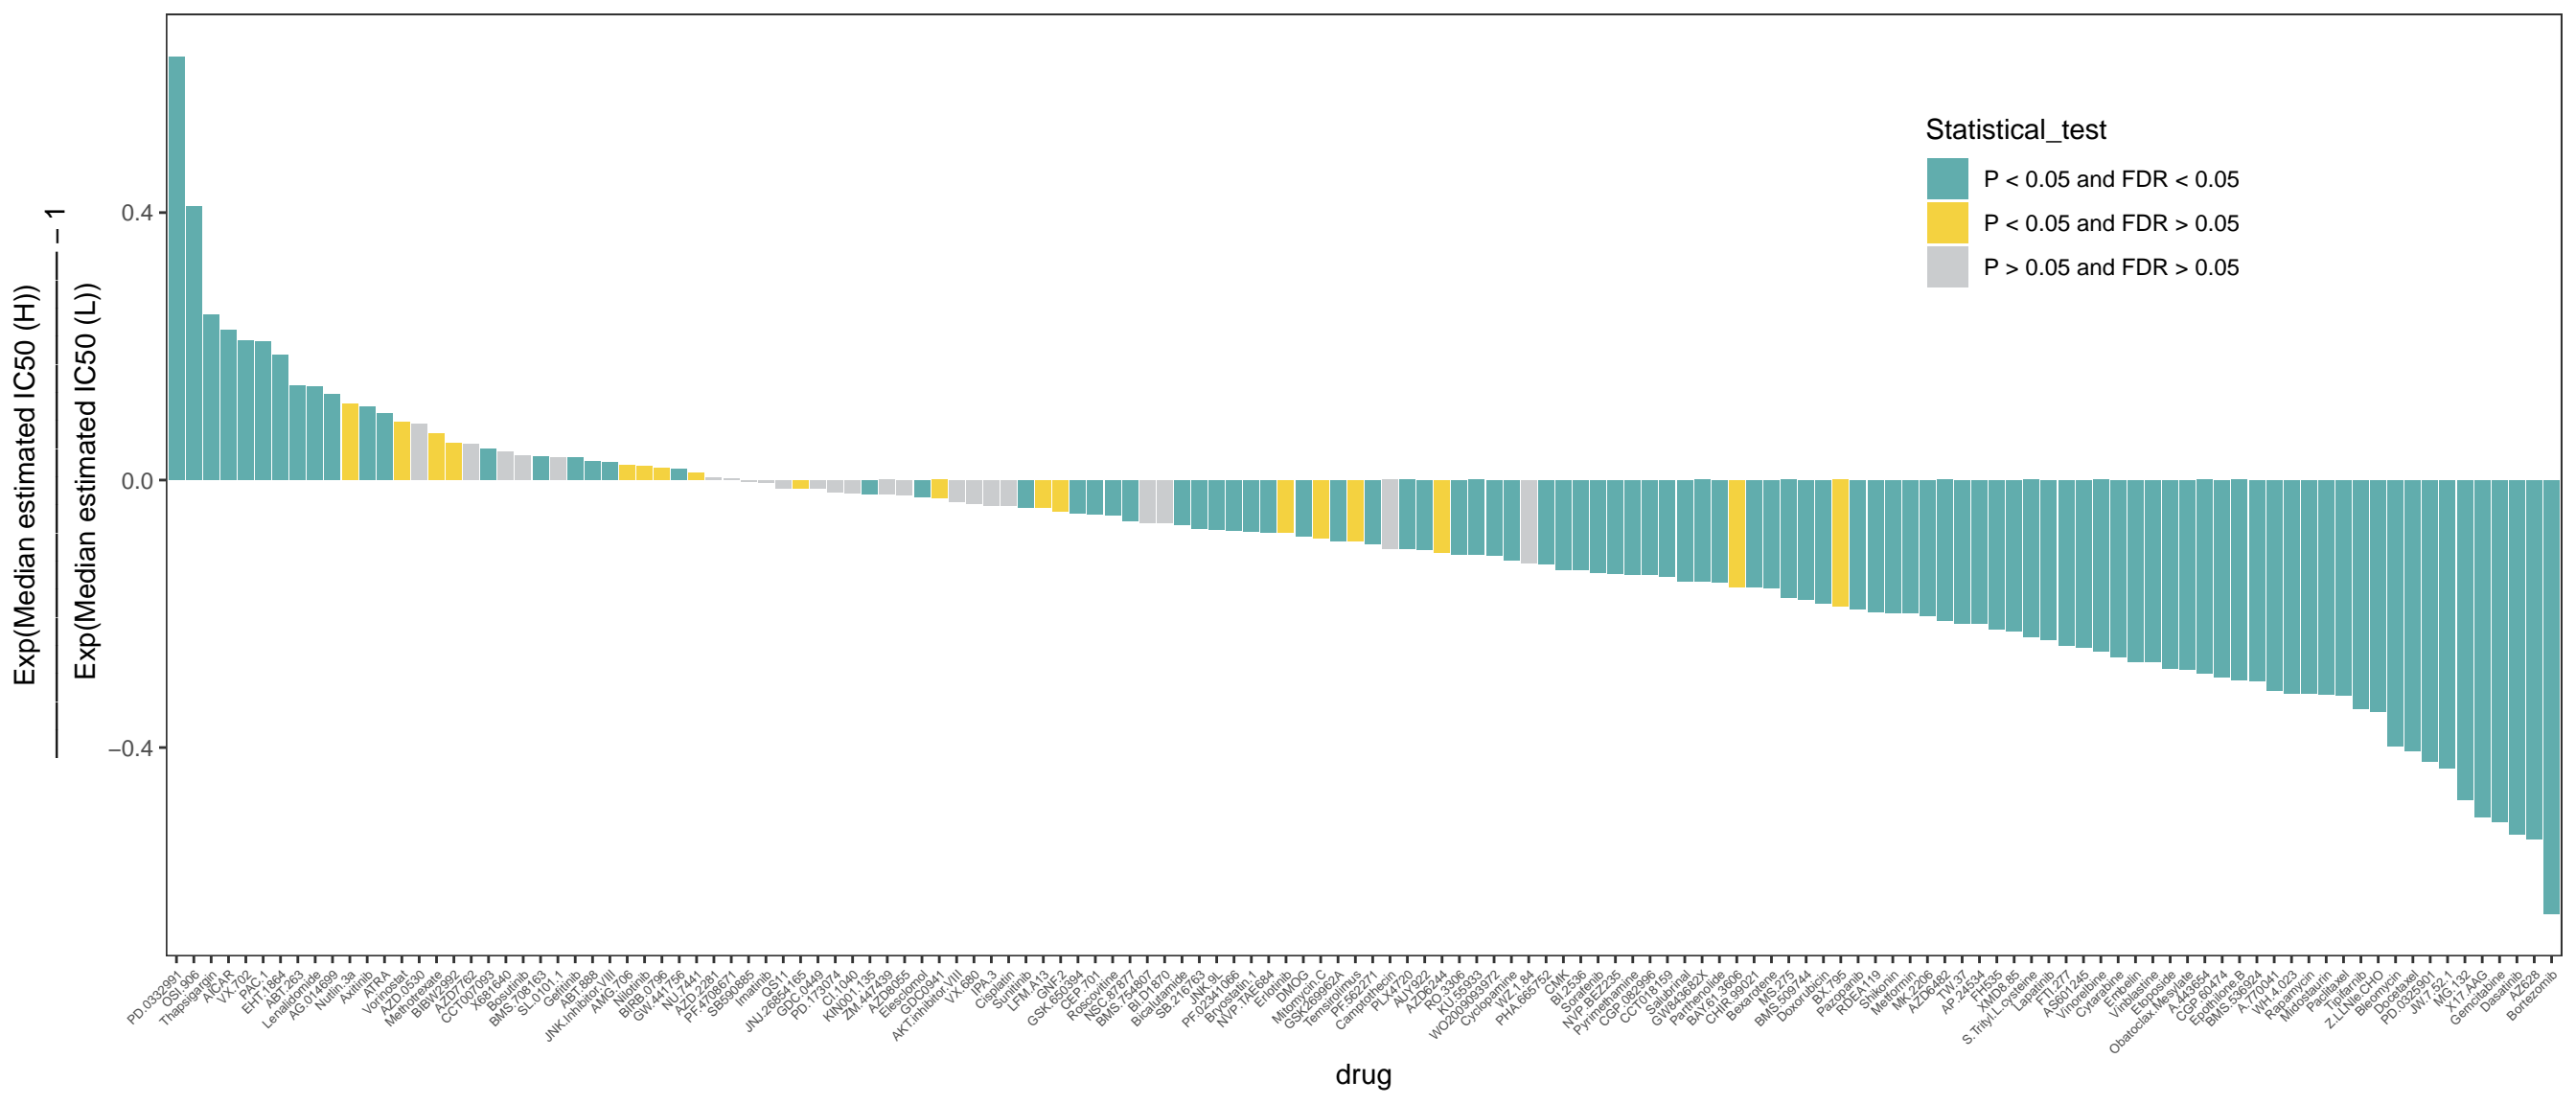

Supplement: Figure_5.zip [file Figure_5.zip]

# Vorinostat

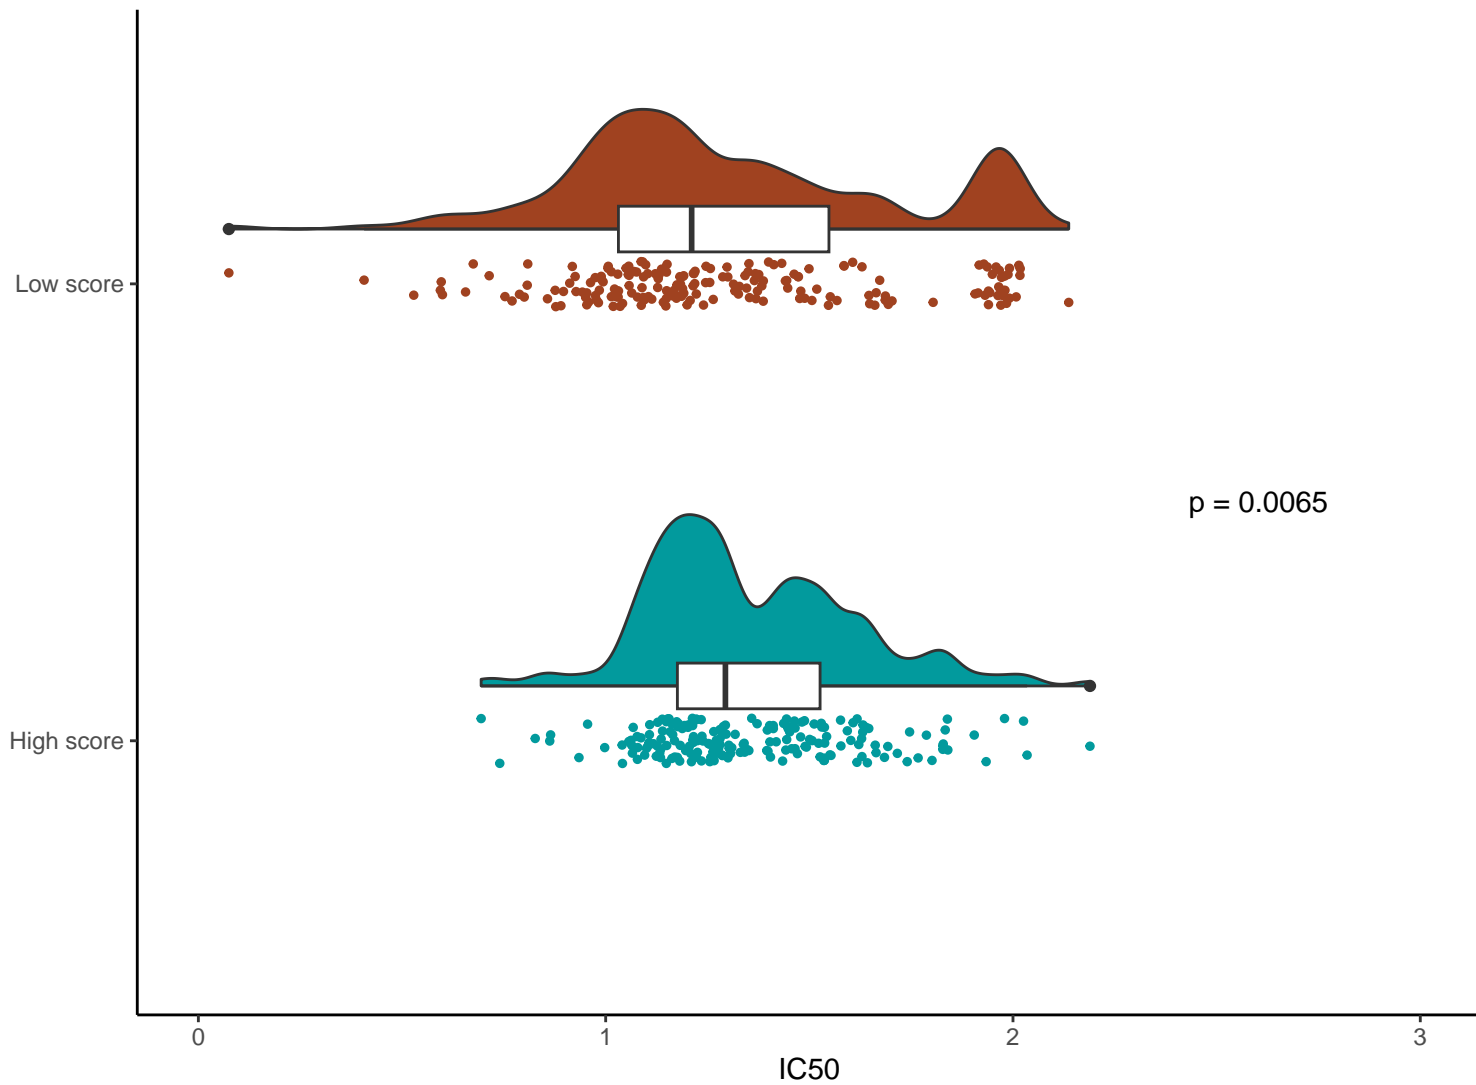

Supplement: Figure_5.zip [file Figure_5.zip]

Kruskal–Wallis,  $p = 0.00039$

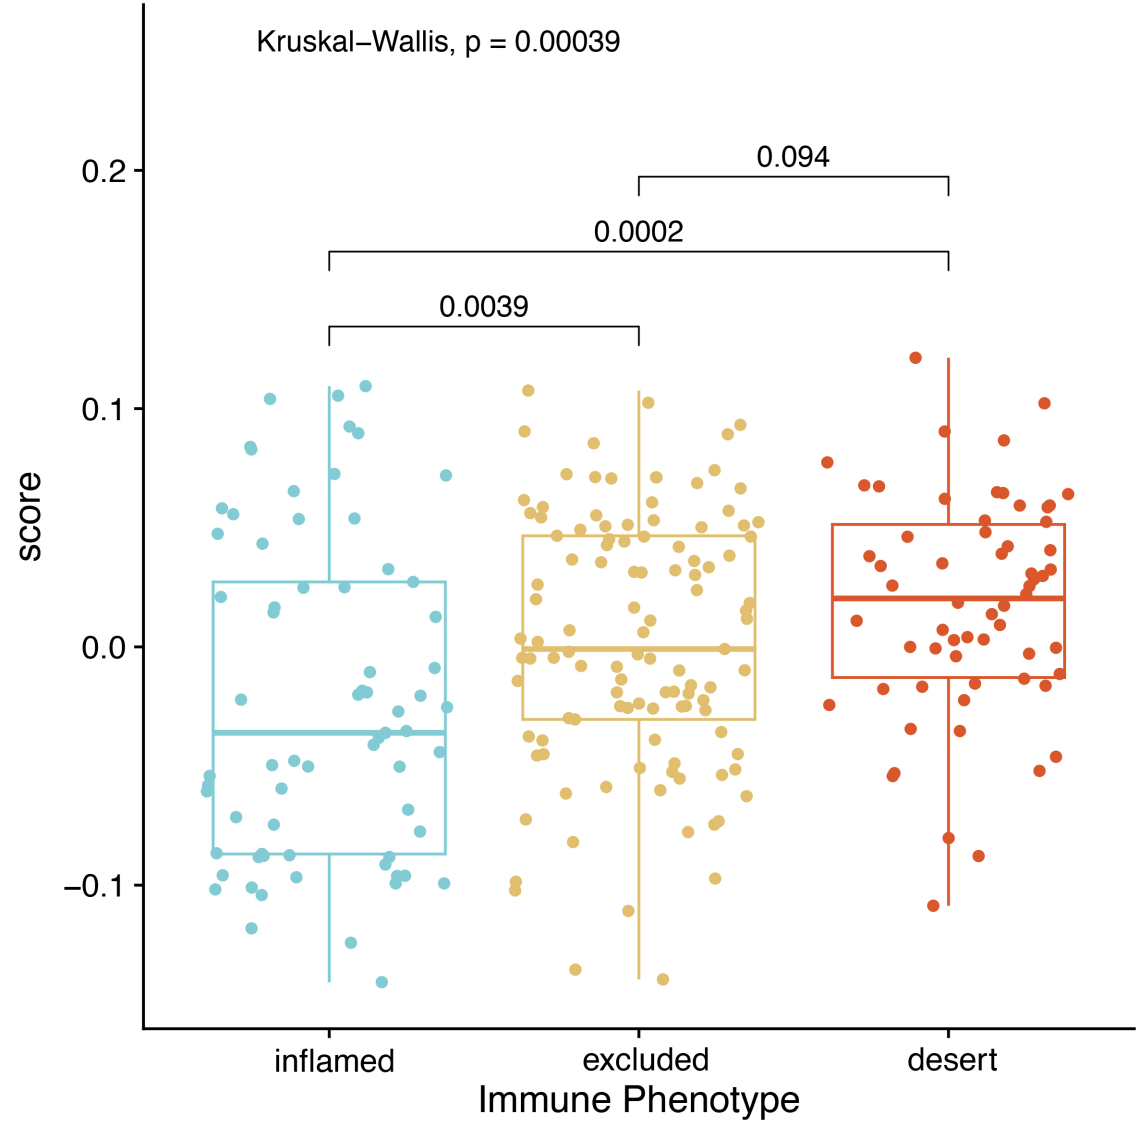

Supplement: Figure_5.zip [file Figure_5.zip]

BAY.61.3606

Low score

High score

p = 0.0034

1

2

3

4

IC50

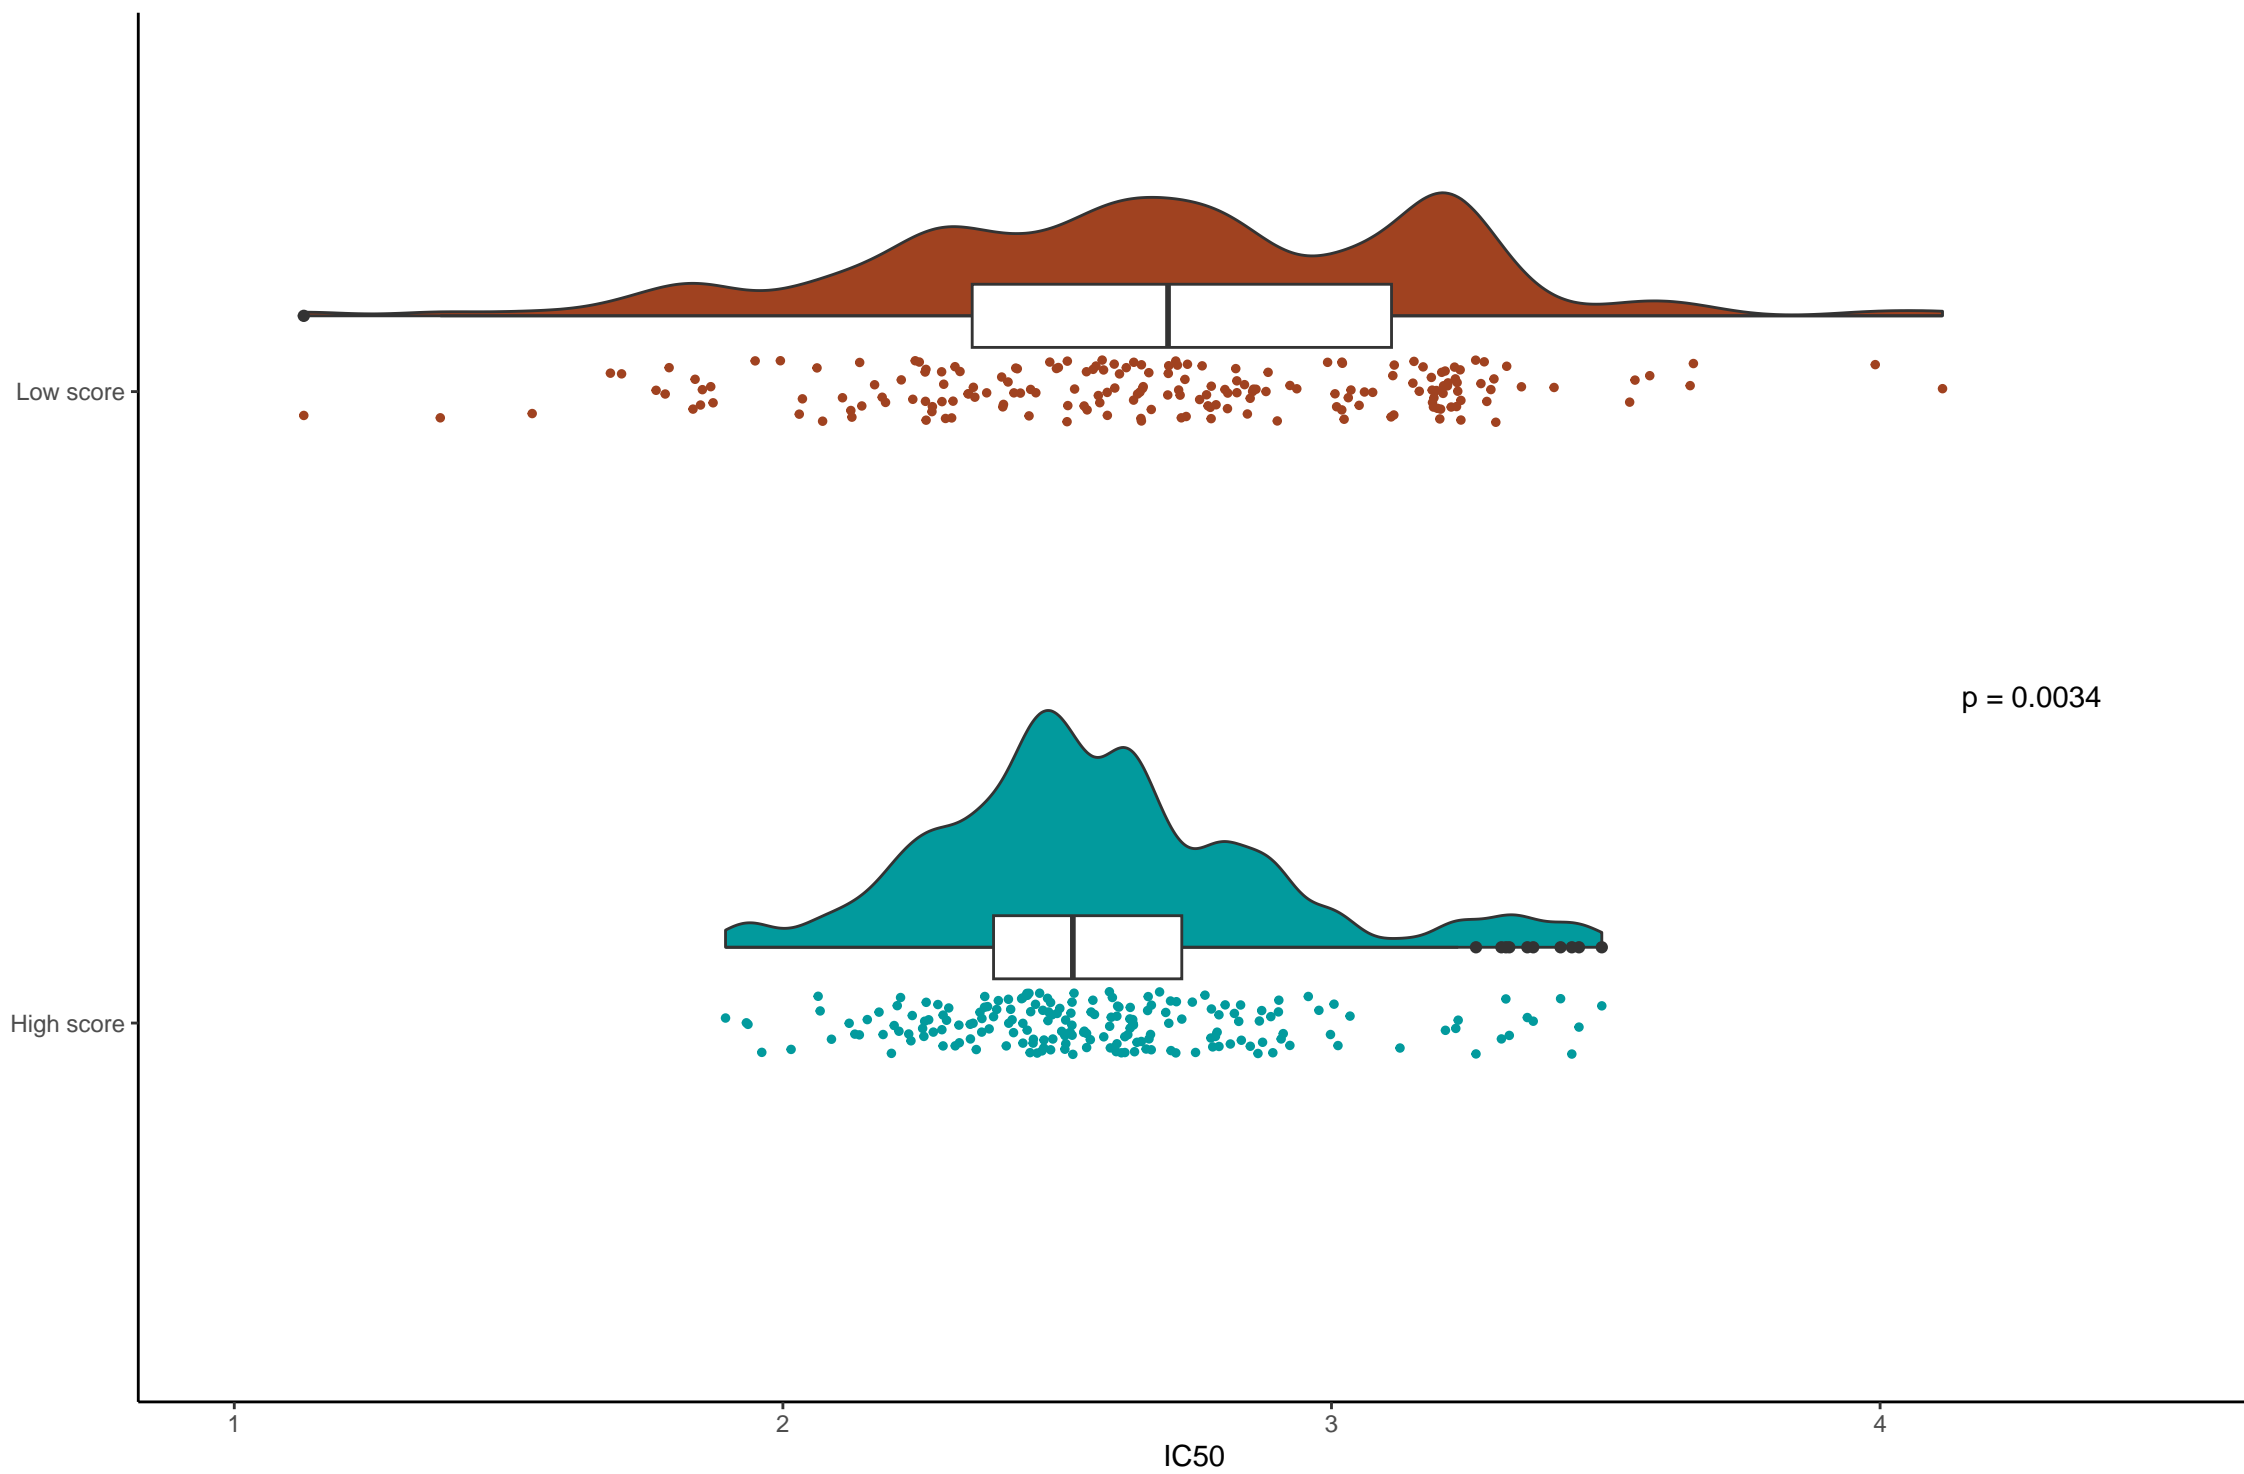

Supplement: Figure_5.zip [file Figure_5.zip]

Kruskal-Wallis,  $p = 0.033$

CuFescore

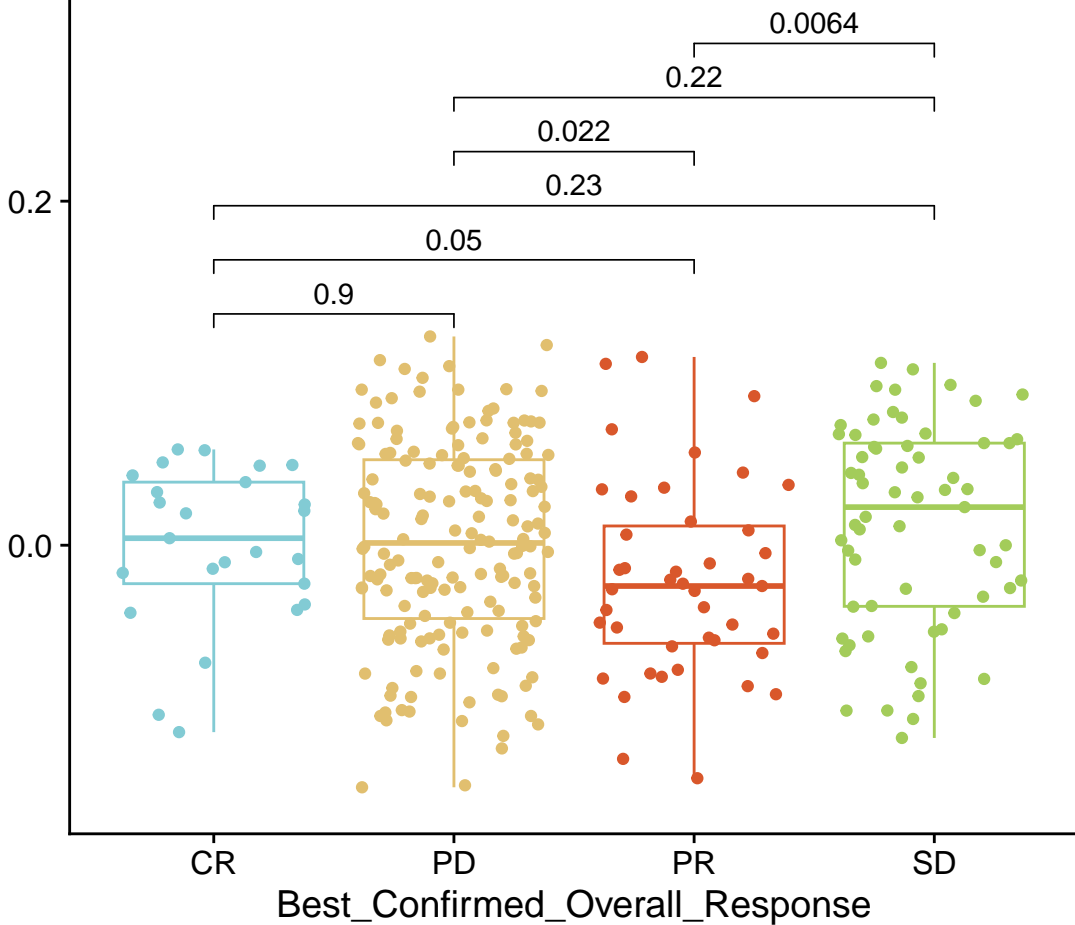

Supplement: Figure_5.zip [file Figure_5.zip]

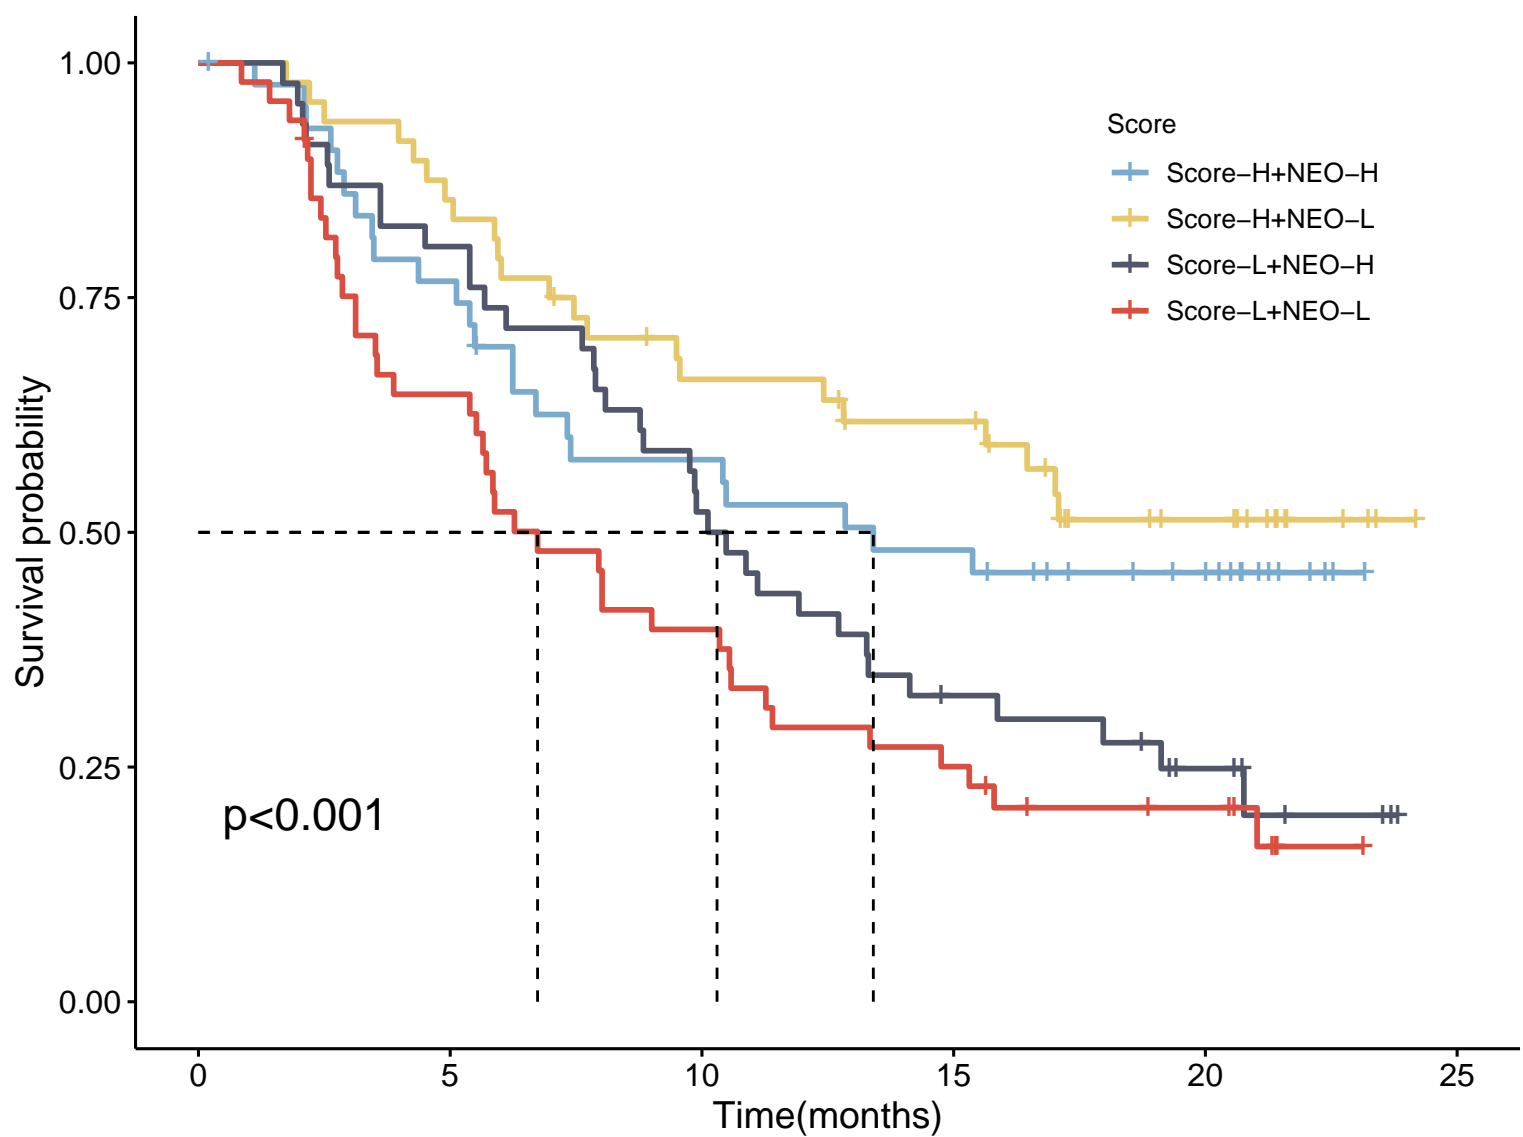

Supplement: Figure_5.zip [file Figure_5.zip]

Points

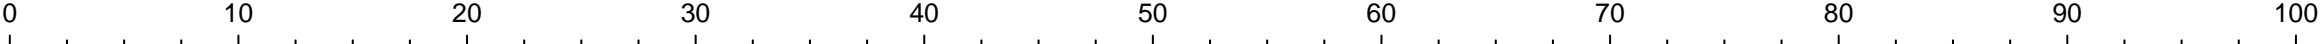

FOXP3

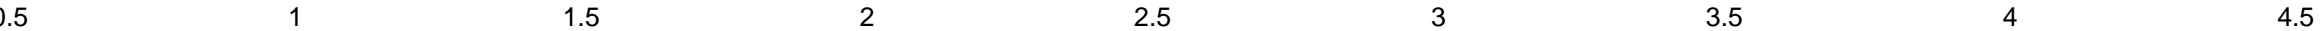

MYD88

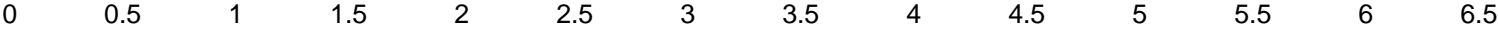

IL6

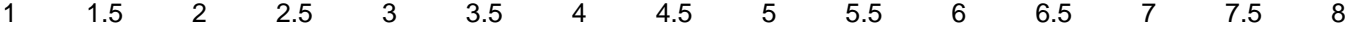

Total Points

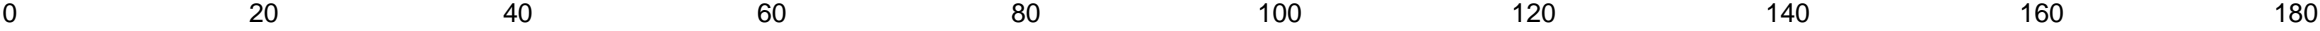

1-year survival

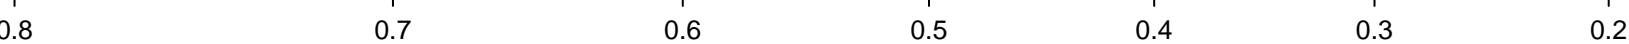

3-year survival

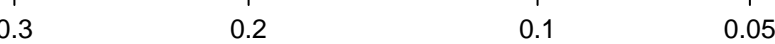

5-year survival

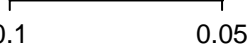

Supplement: Figure_6.zip [file Figure_6.zip]

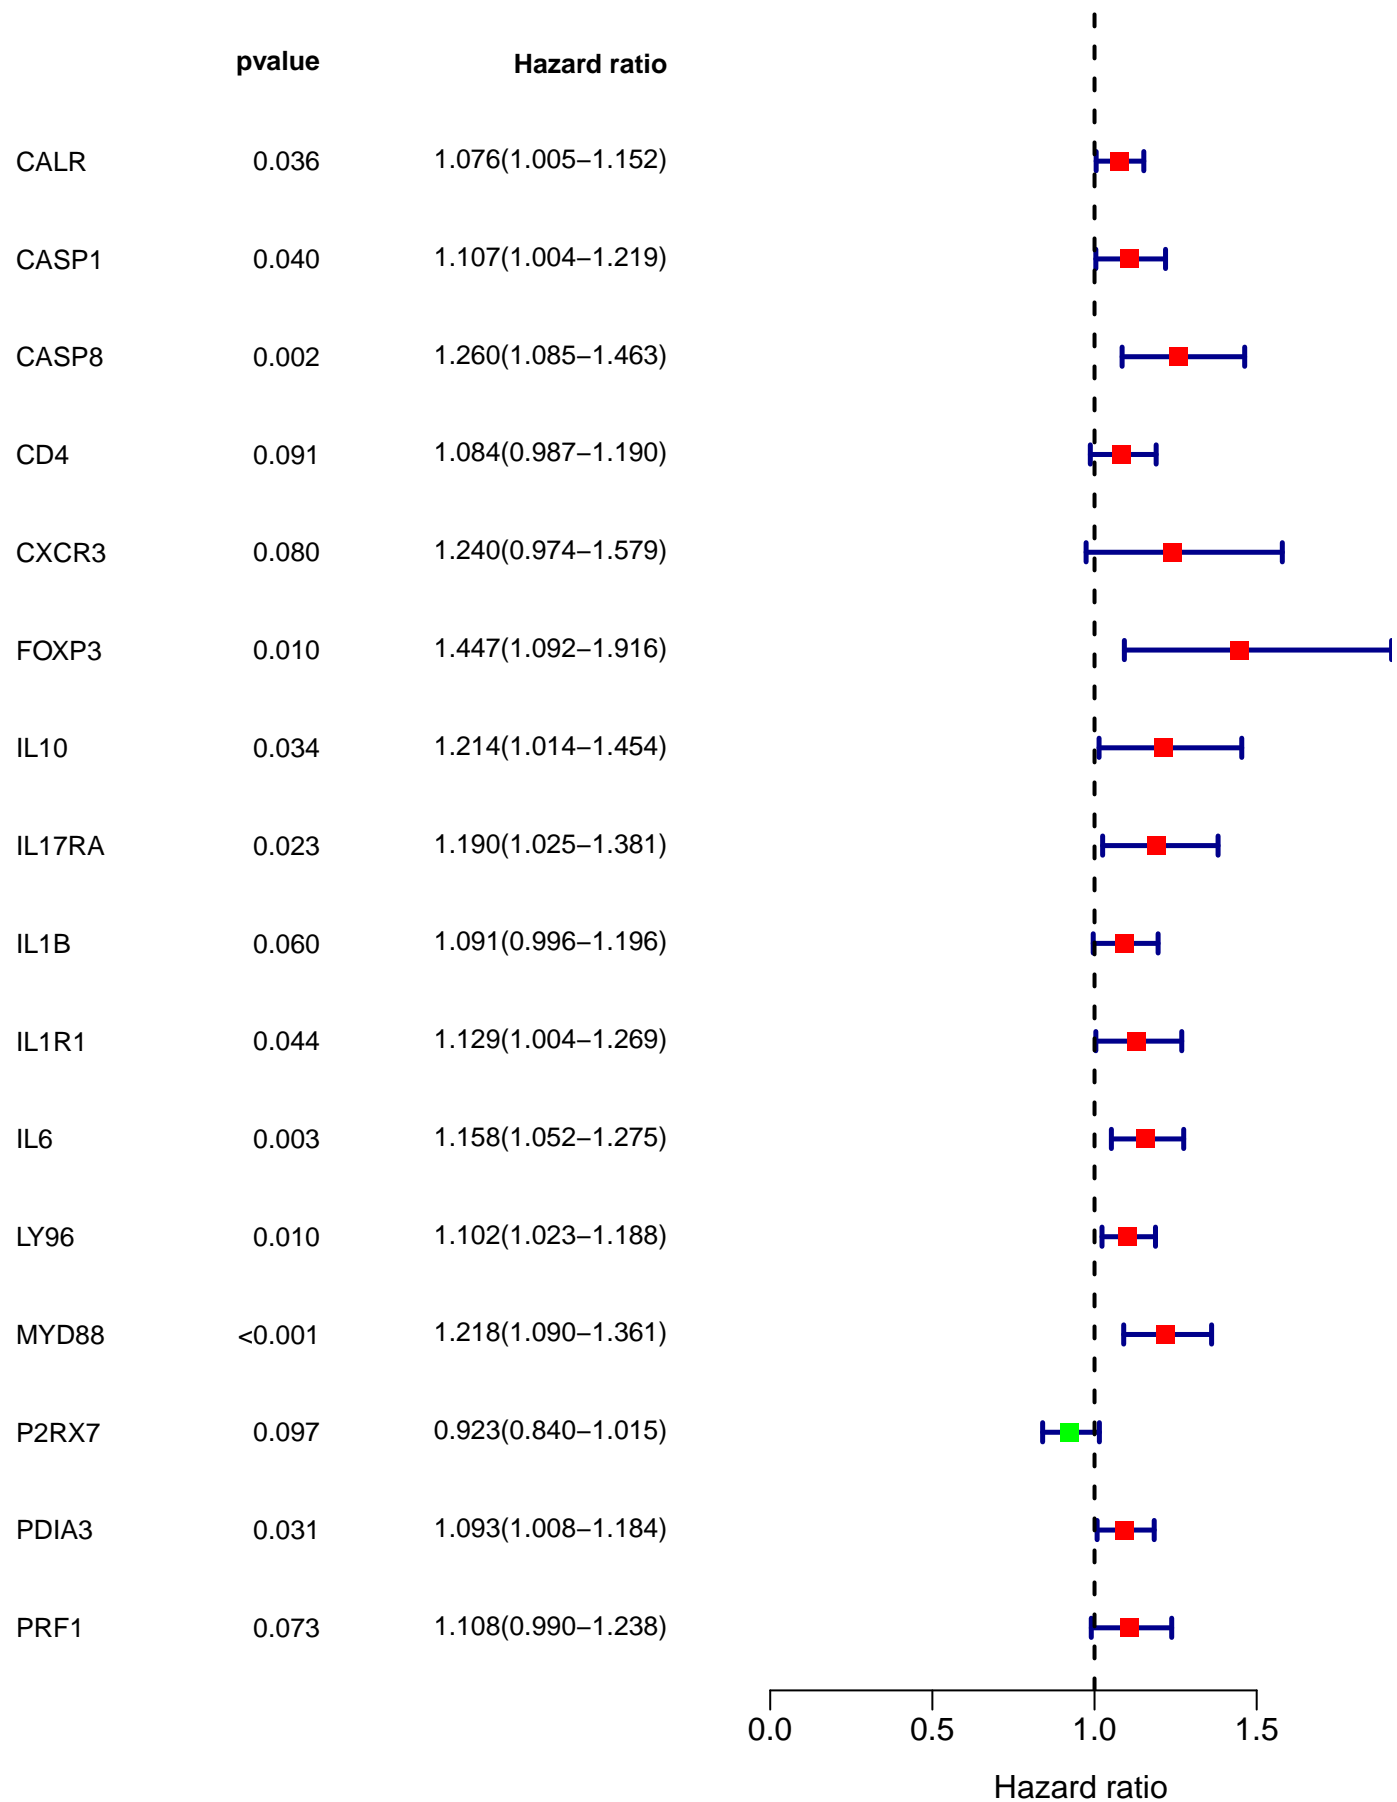

Supplement: Figure_6.zip [file Figure_6.zip]

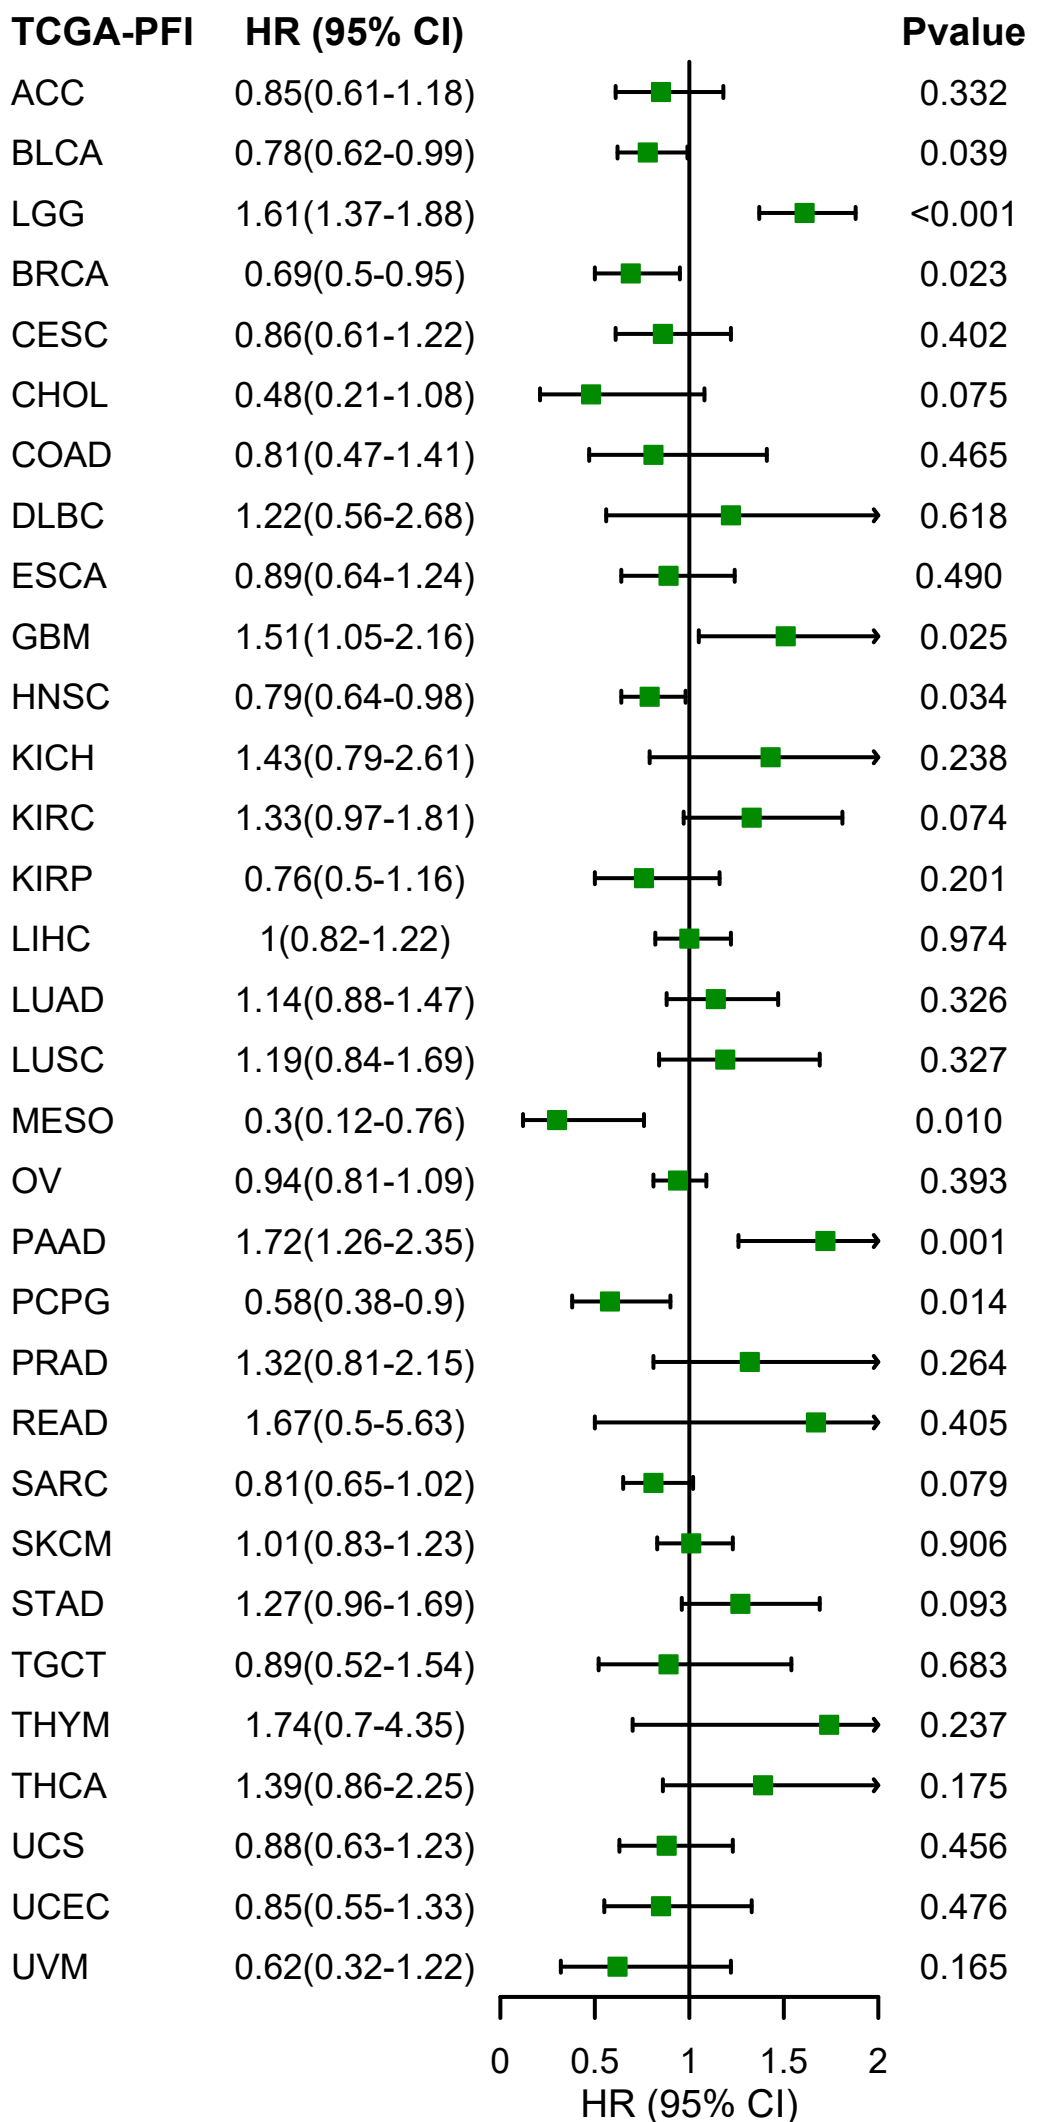

Supplement: Figure_6.zip [file Figure_6.zip]

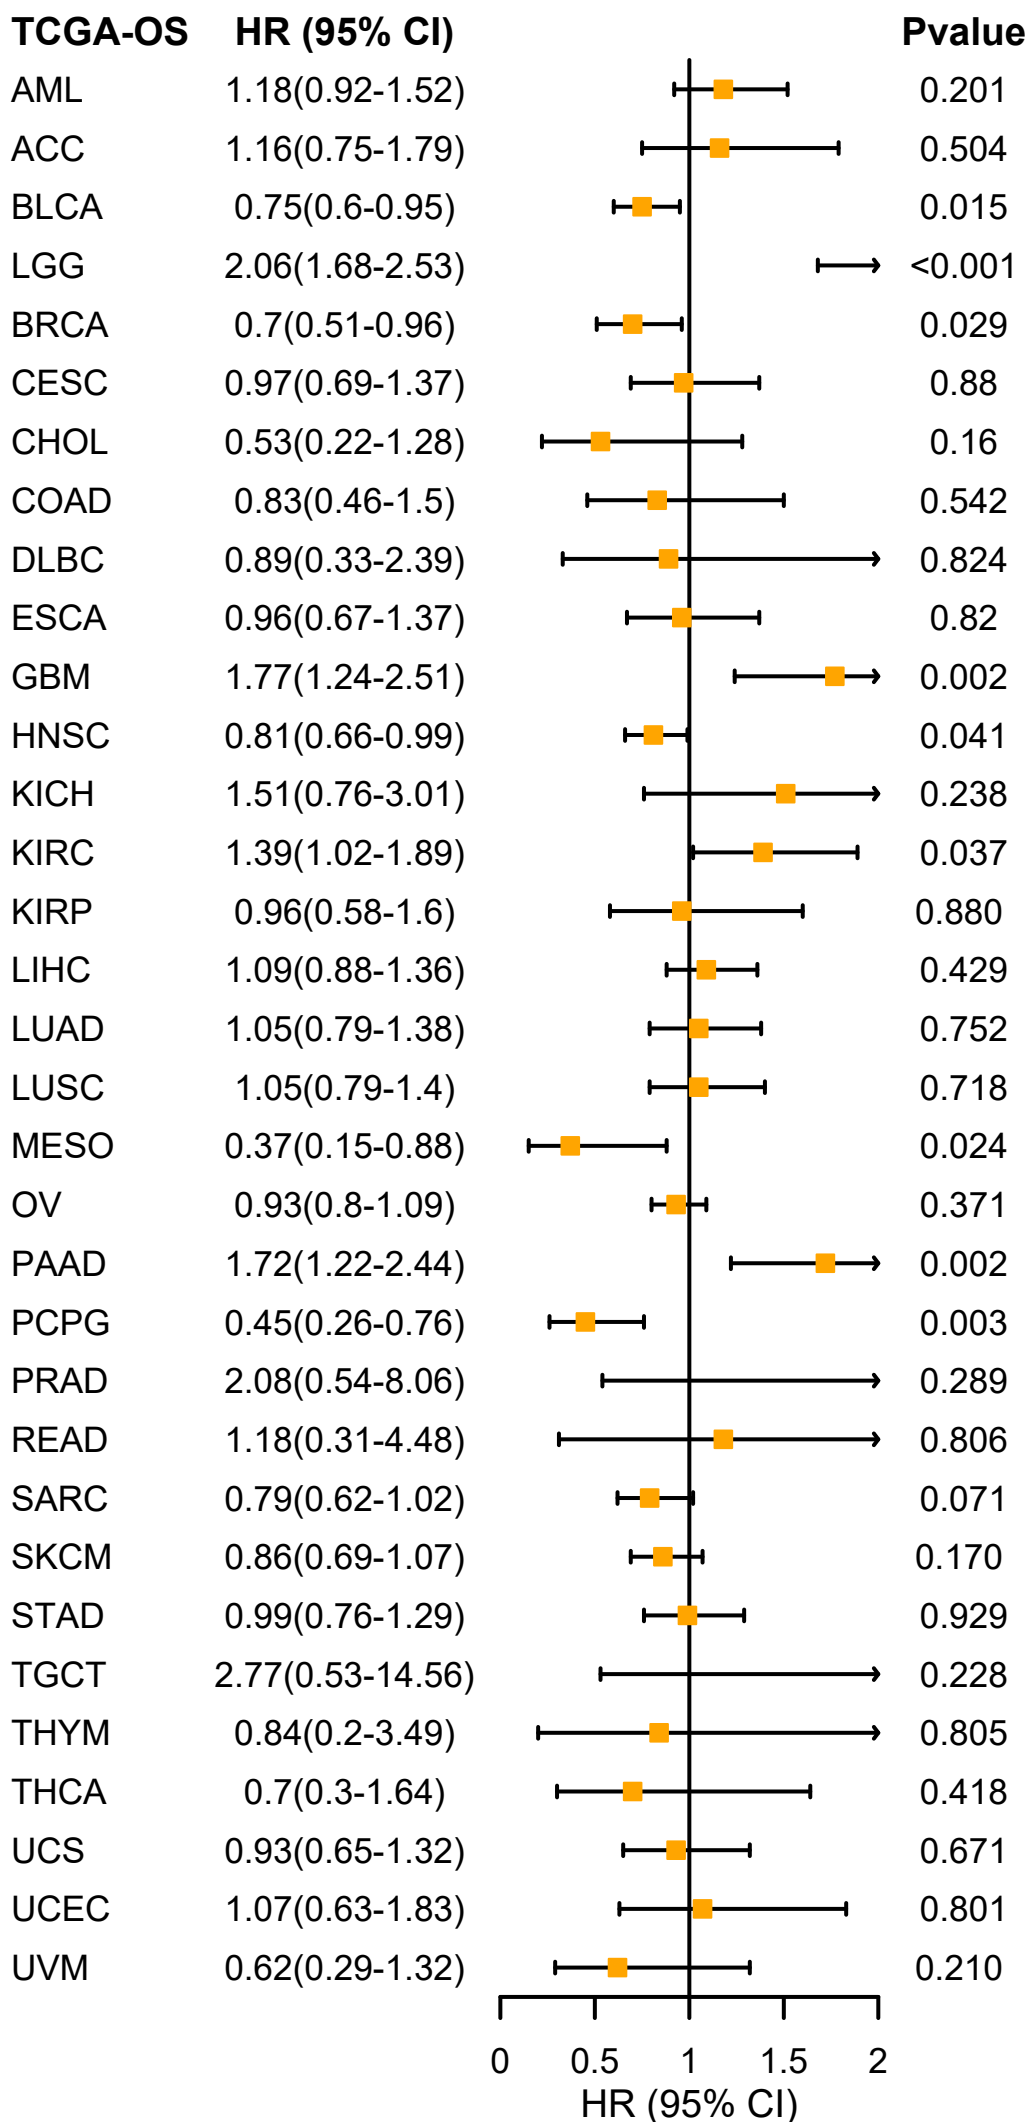

Supplement: Figure_6.zip [file Figure_6.zip]

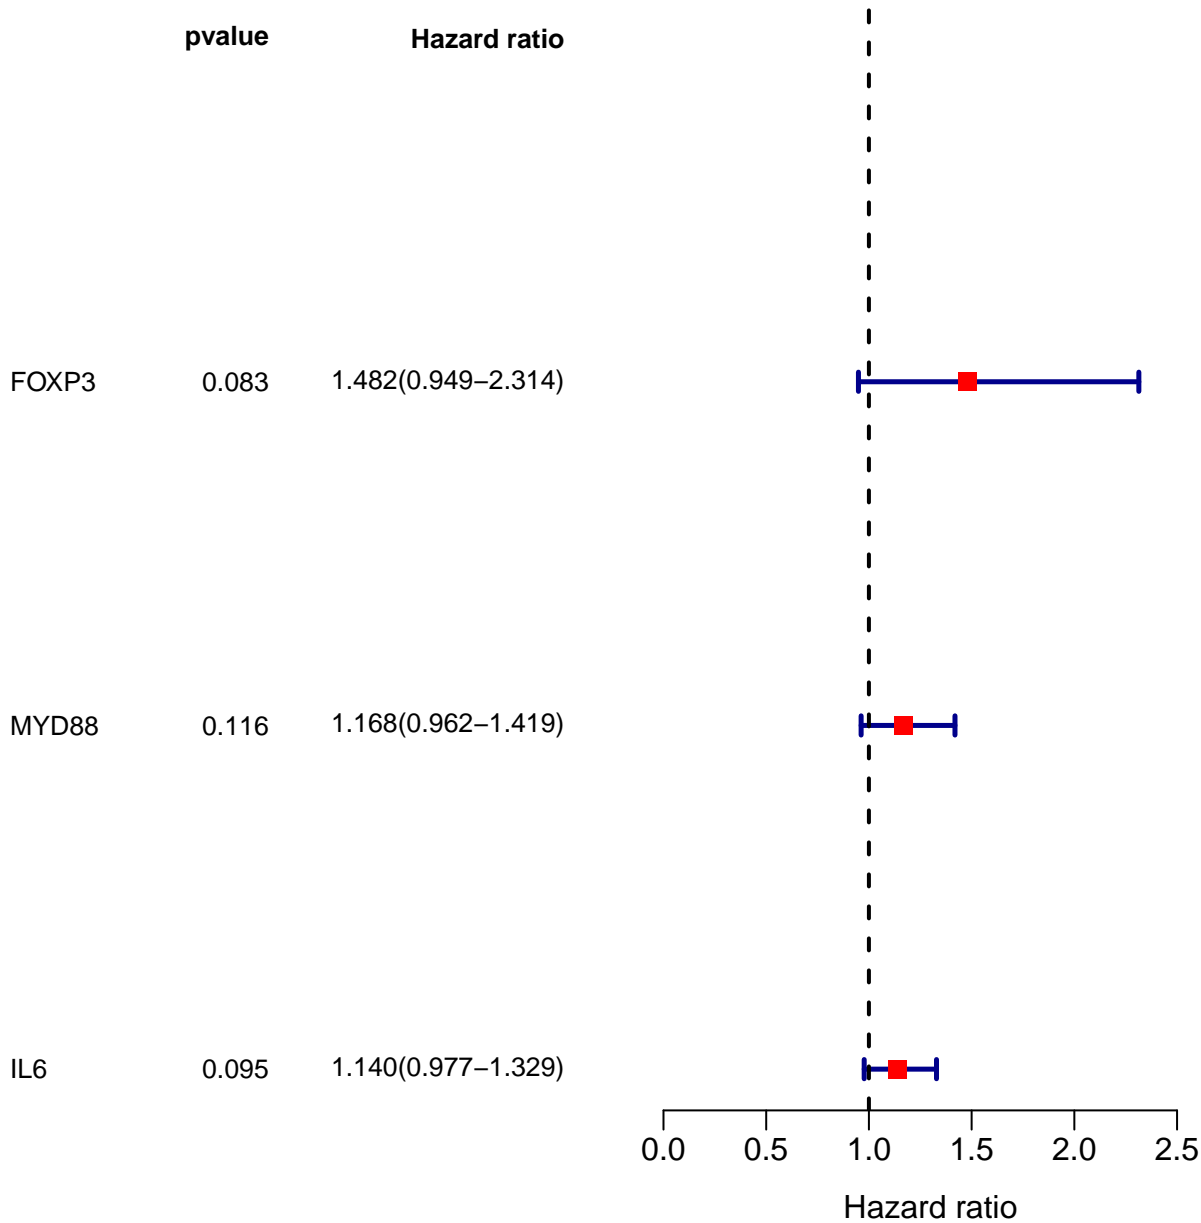

Supplement: Figure_6.zip [file Figure_6.zip]

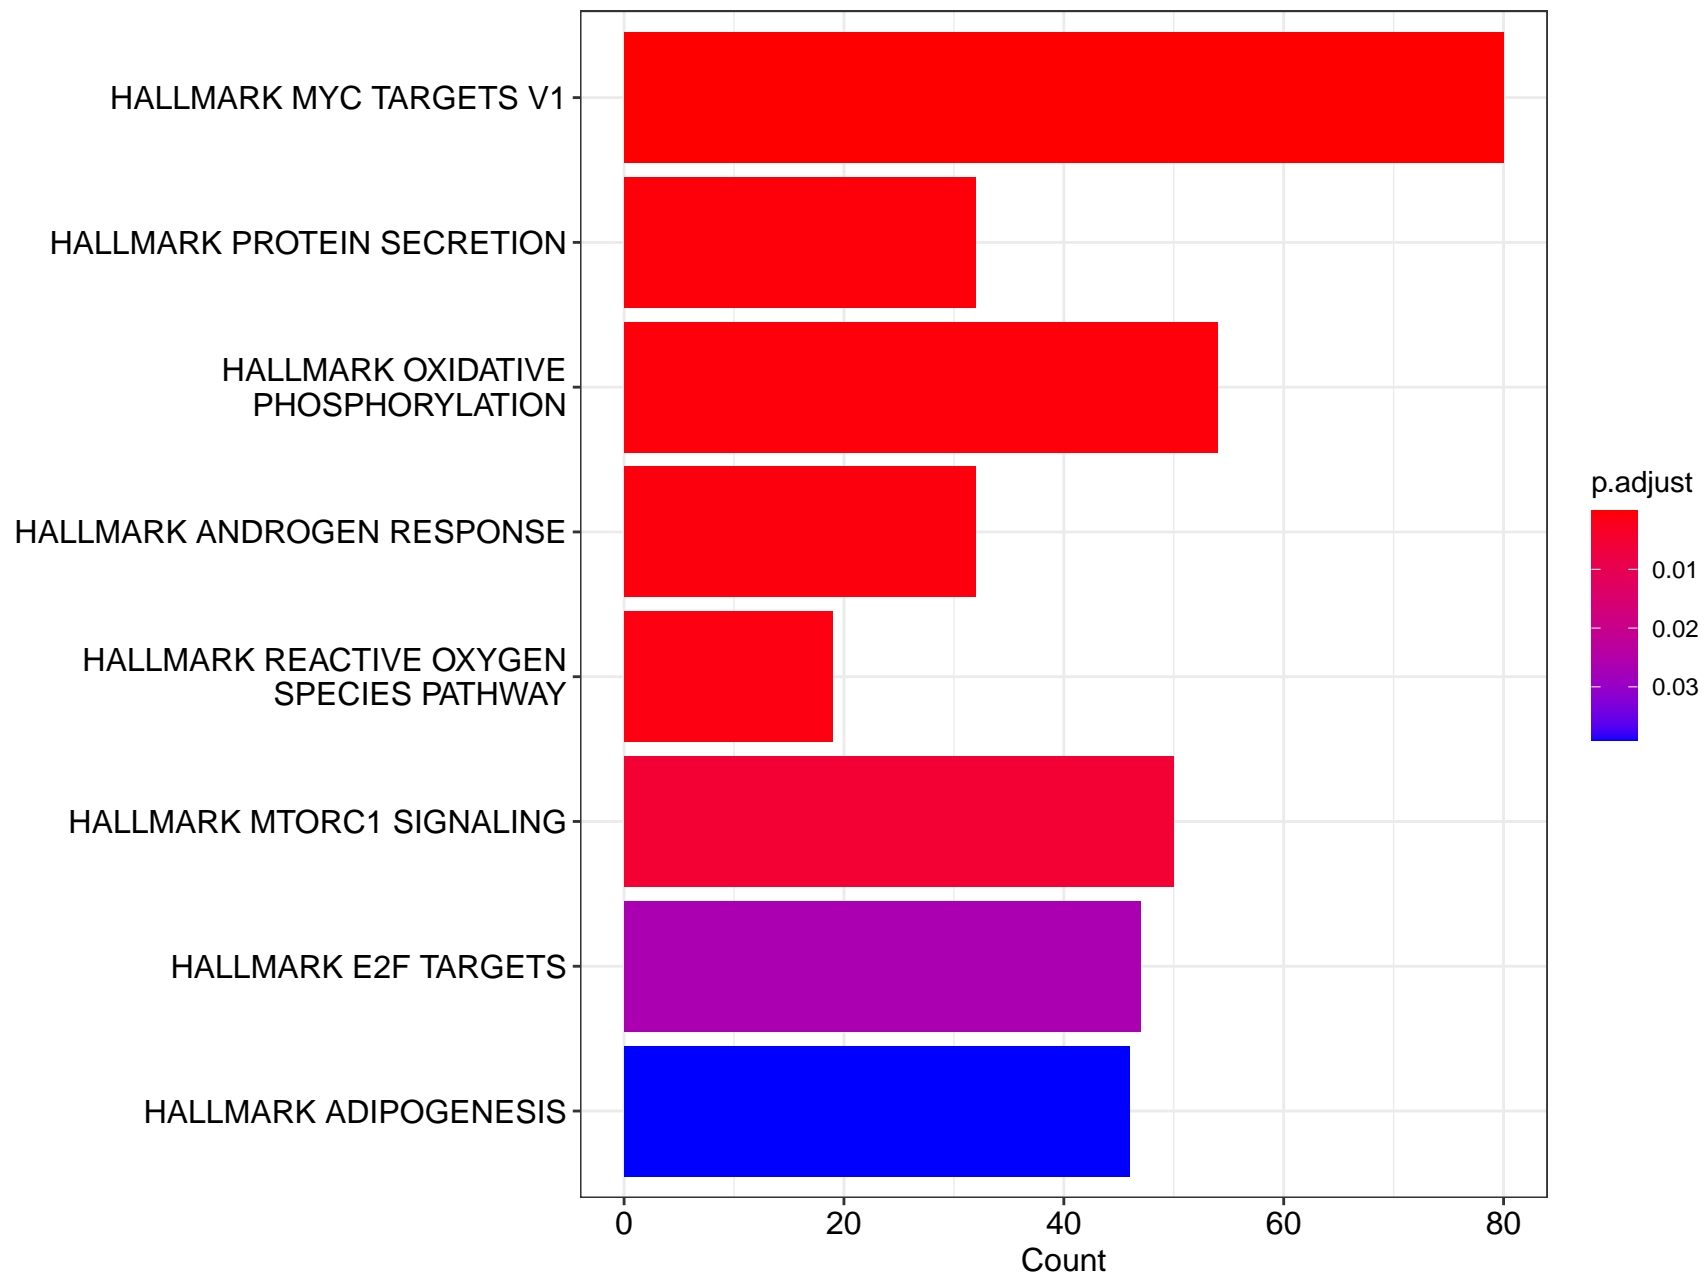

Supplement: Figure_7.zip [file Figure_7.zip]

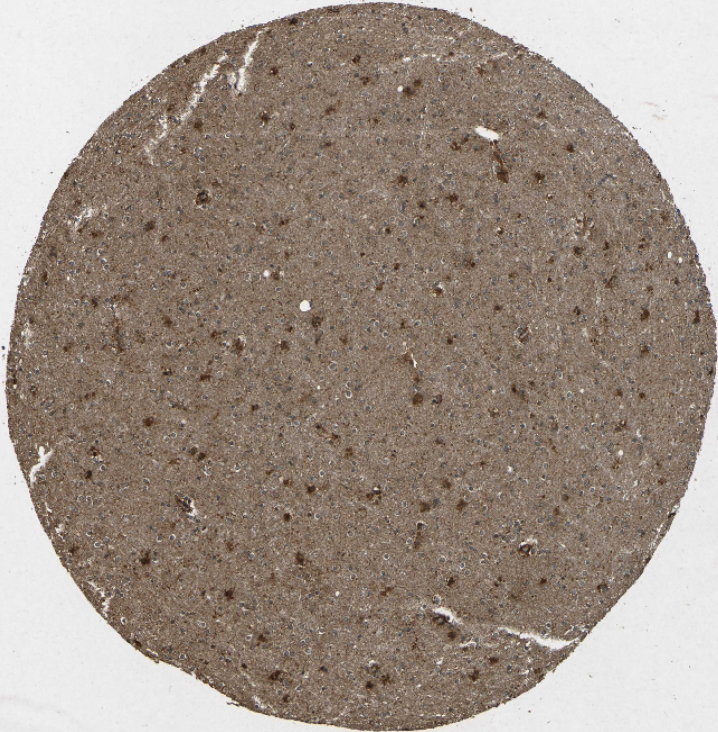

Supplement: Figure_7.zip [file Figure_7.zip]

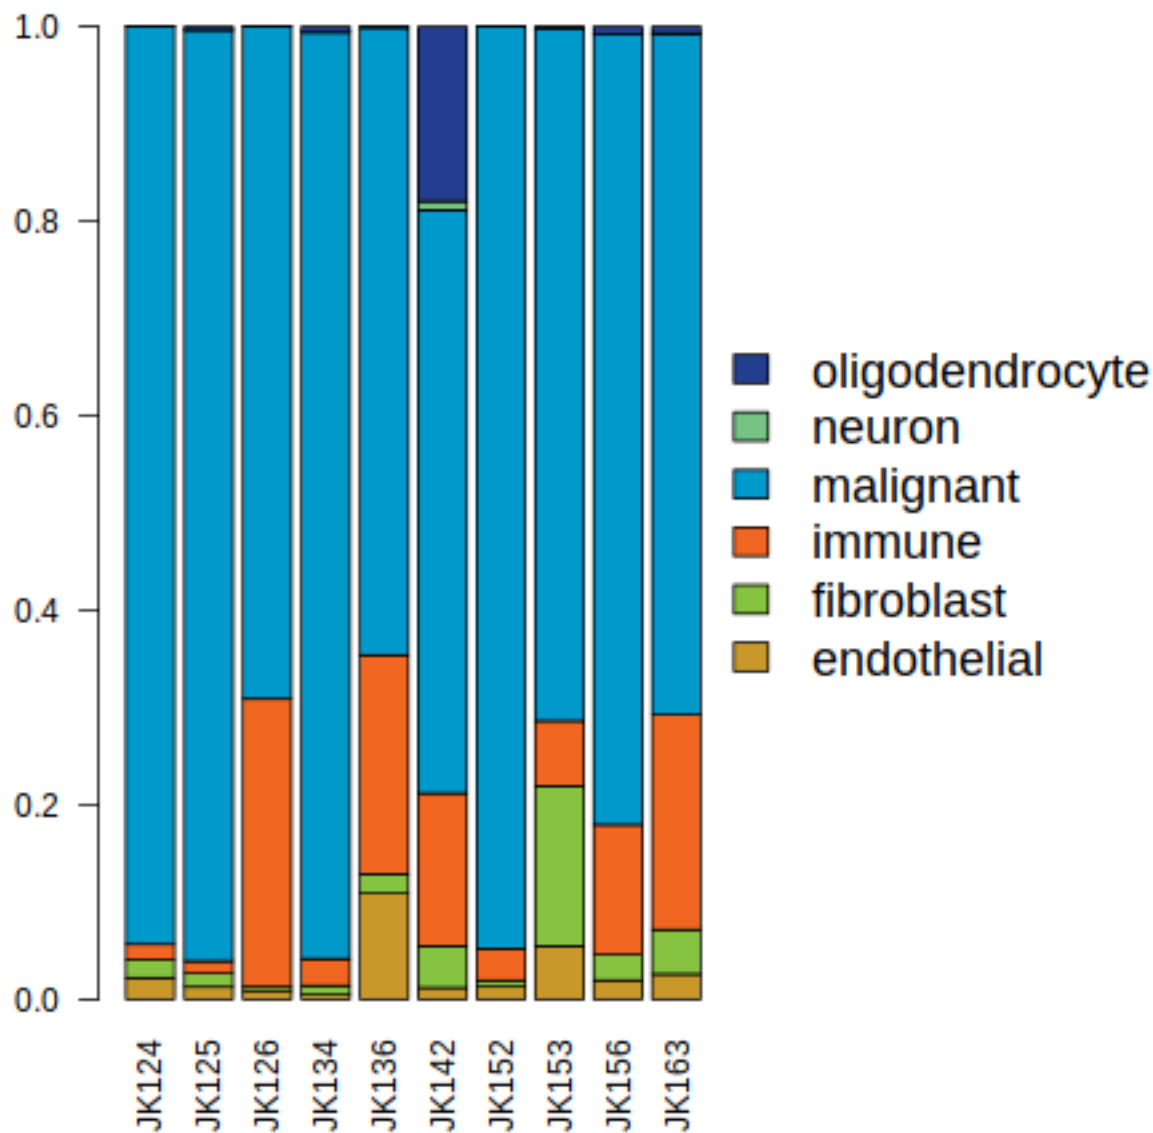

Supplement: Figure_7.zip [file Figure_7.zip]

The expression of MYD88  
Log<sub>2</sub> (FPKM+1)

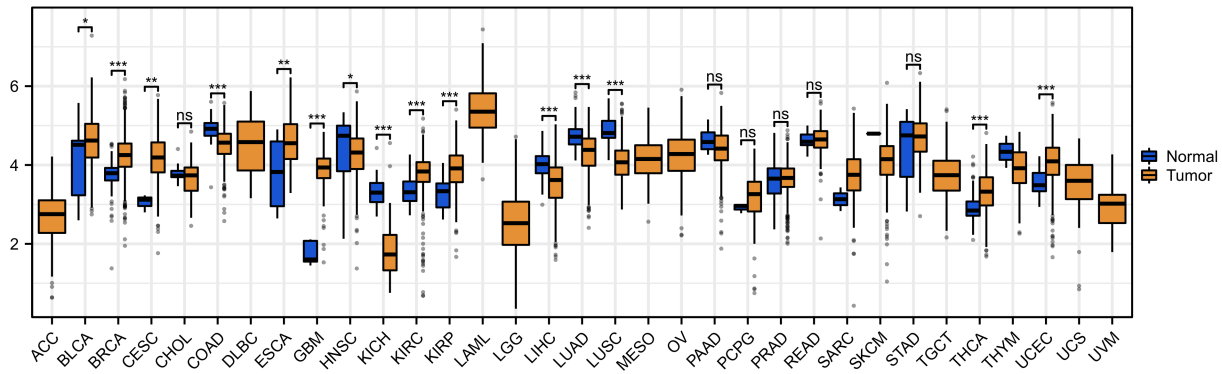

Supplement: Figure_7.zip [file Figure_7.zip]

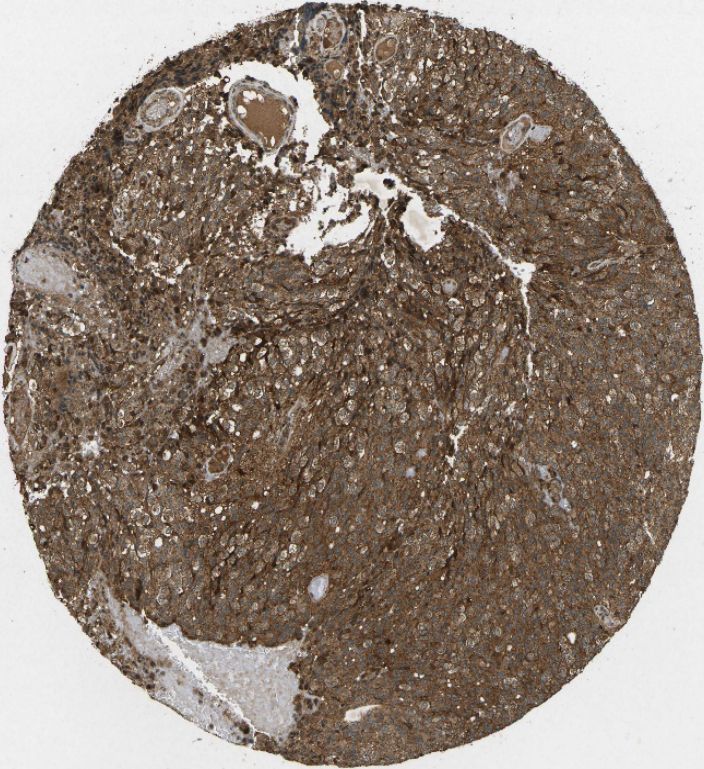

Supplement: Figure_7.zip [file Figure_7.zip]

cell\_type

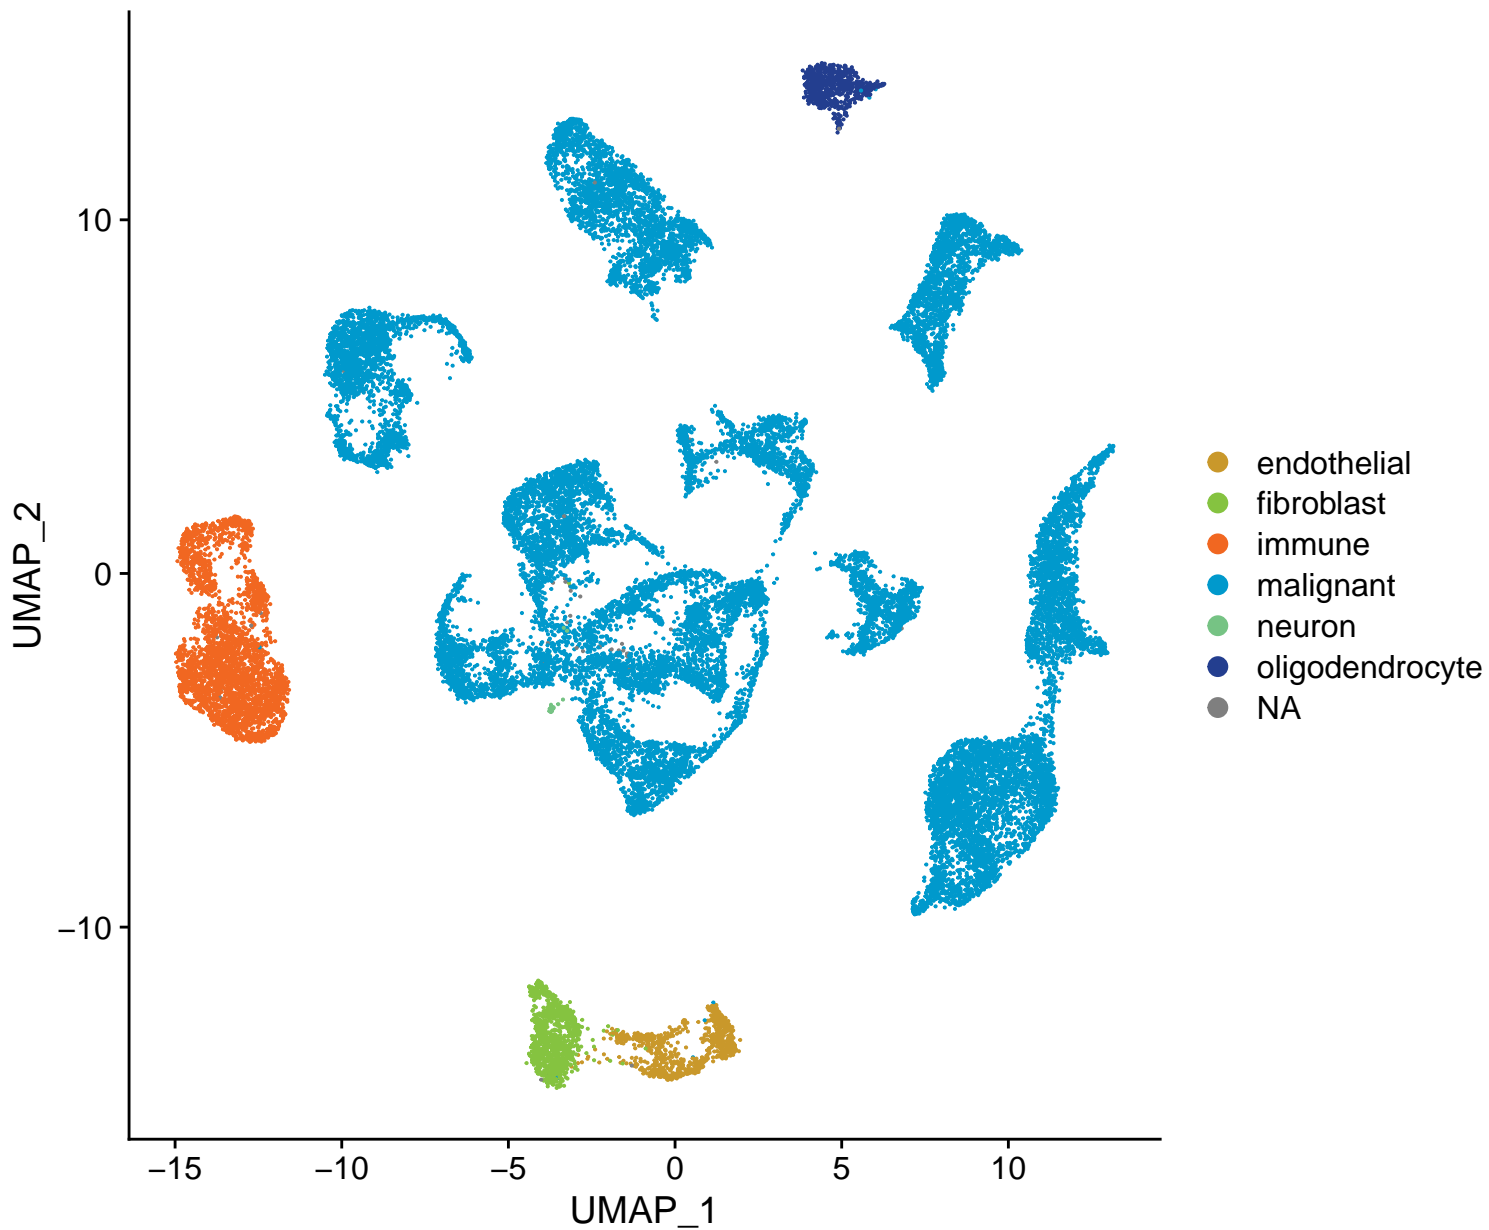

Supplement: Figure_7.zip [file Figure_7.zip]

# MYD88

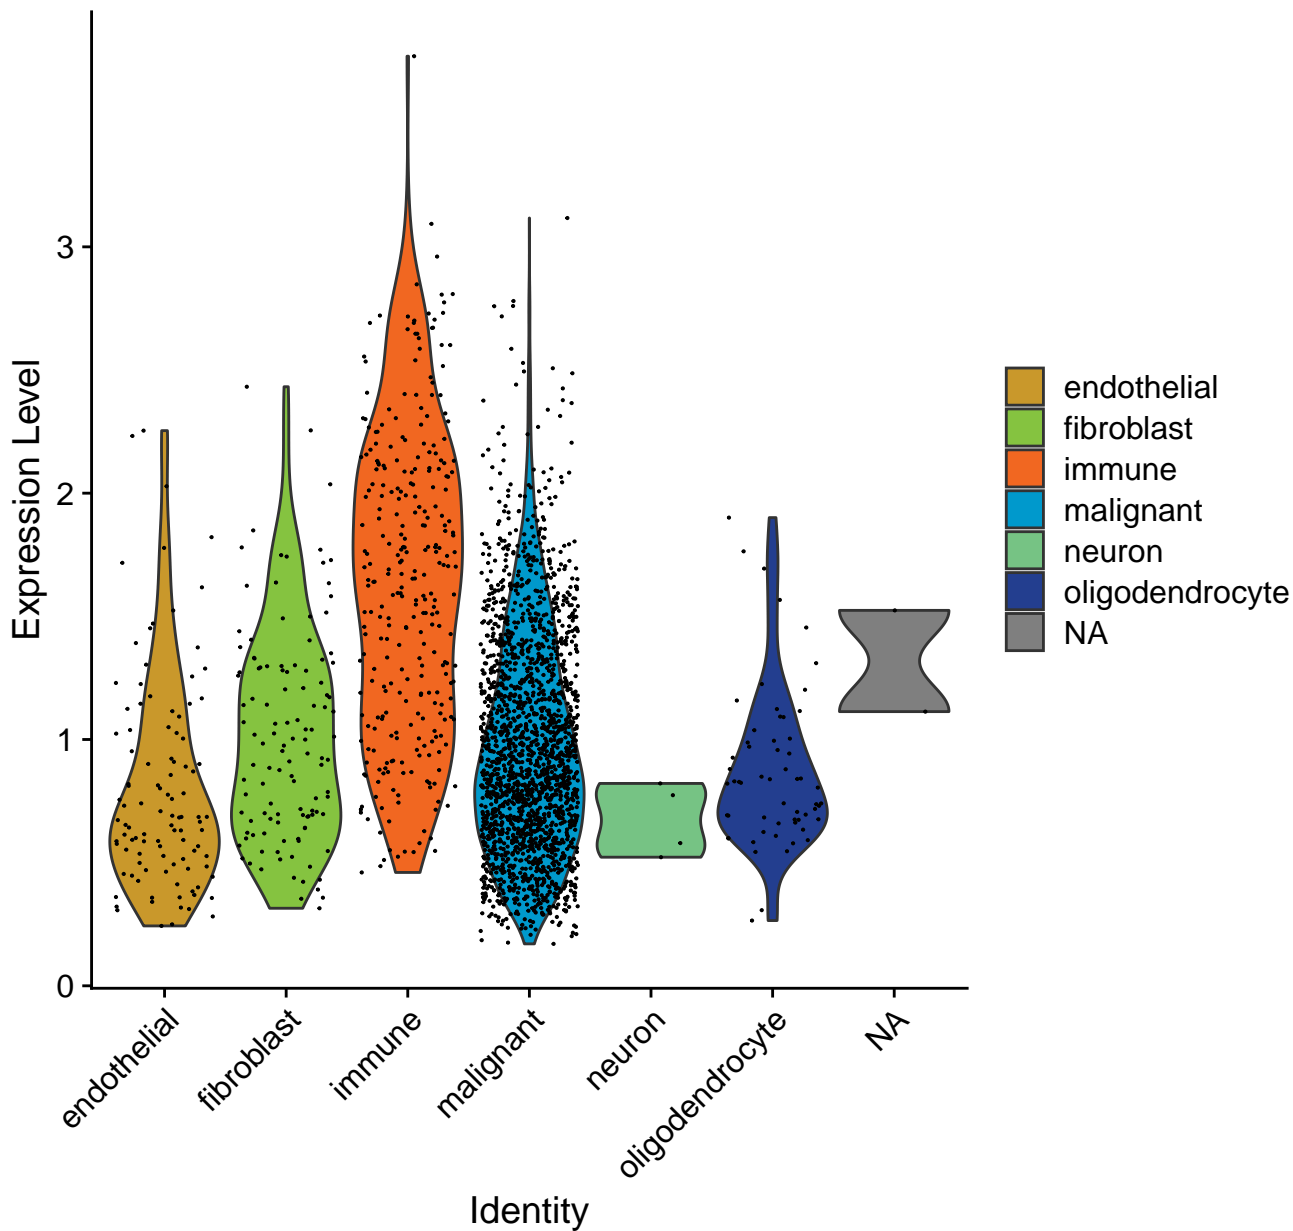

Supplement: Figure_7.zip [file Figure_7.zip]

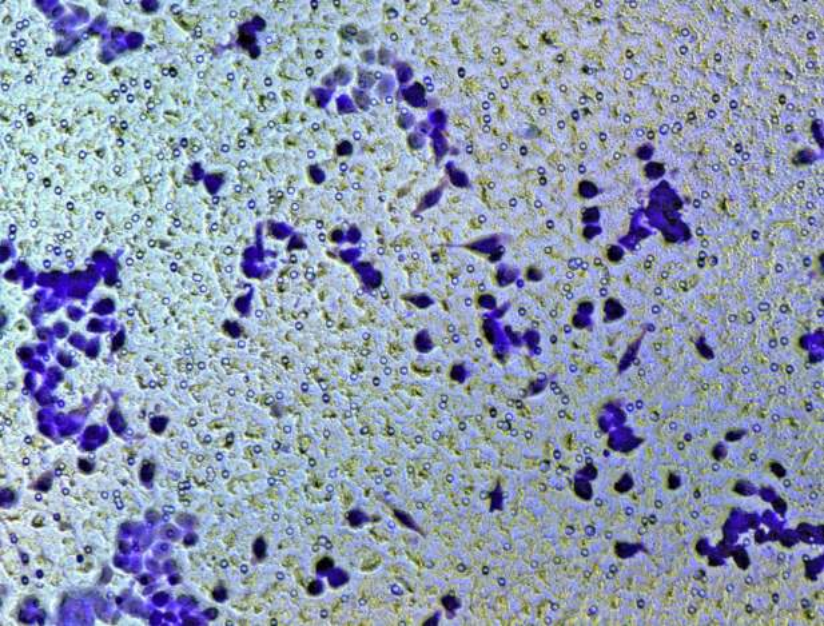

Supplement: Figure_8.zip [file Figure_8.zip]

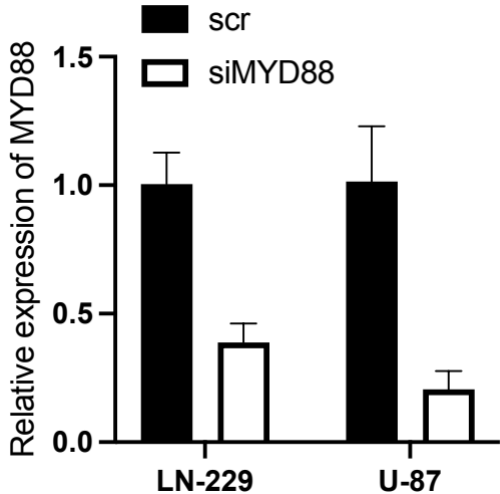

Supplement: Figure_8.zip [file Figure_8.zip]

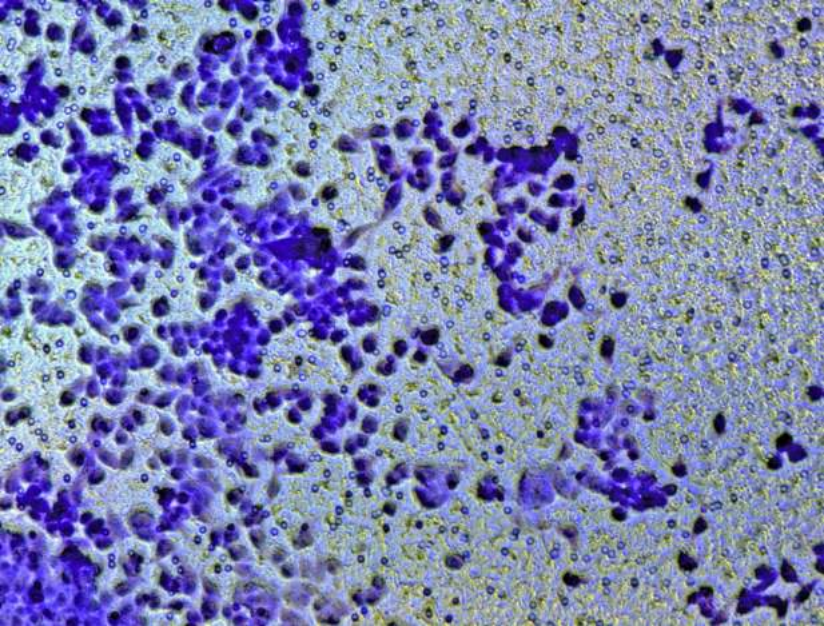

Supplement: Figure_8.zip [file Figure_8.zip]

Number of invaded cells(% of control)

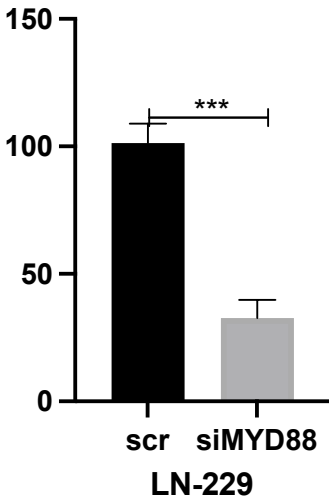

Supplement: Figure_8.zip [file Figure_8.zip]

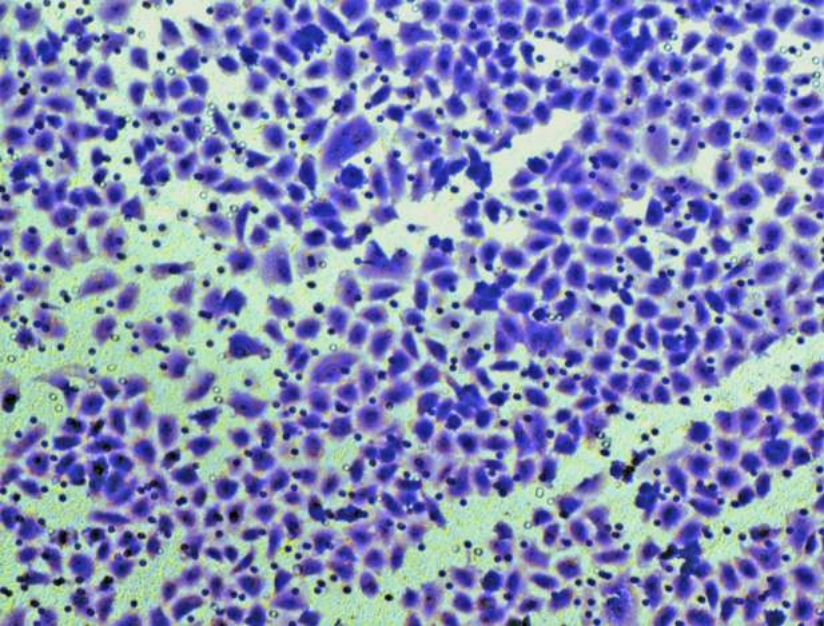

Supplement: Figure_8.zip [file Figure_8.zip]

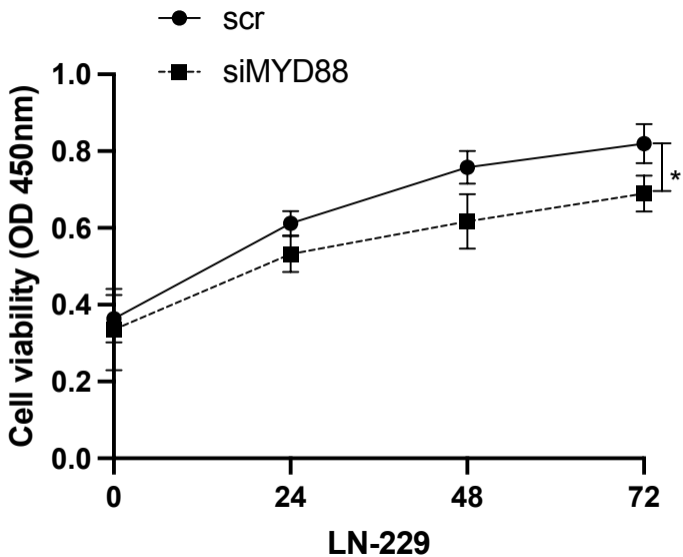

Supplement: Figure_8.zip [file Figure_8.zip]

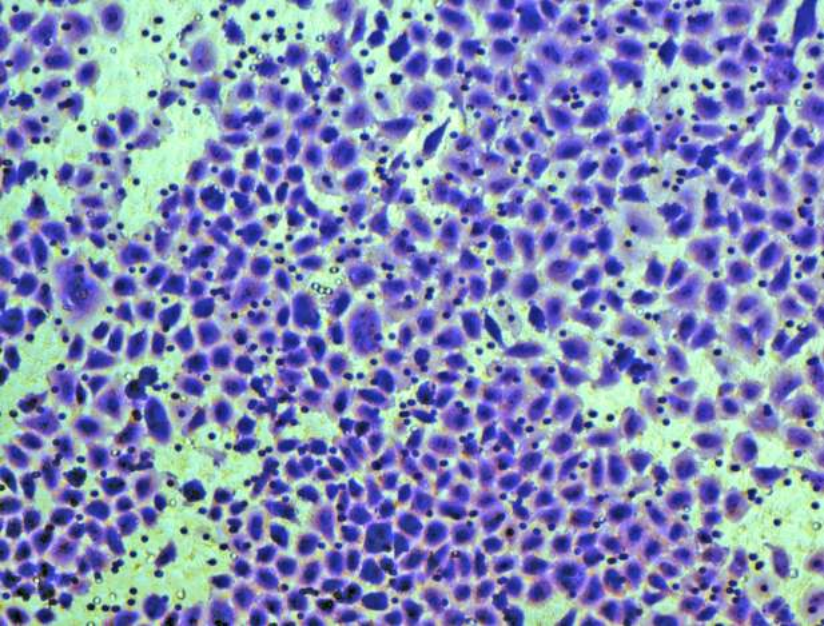

Supplement: Figure_8.zip [file Figure_8.zip]

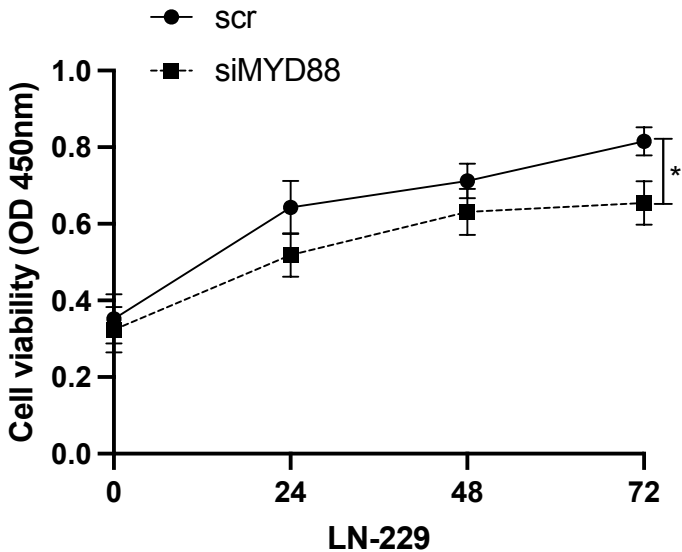

Supplement: Figure_8.zip [file Figure_8.zip]

Number of invaded cells(% of control)

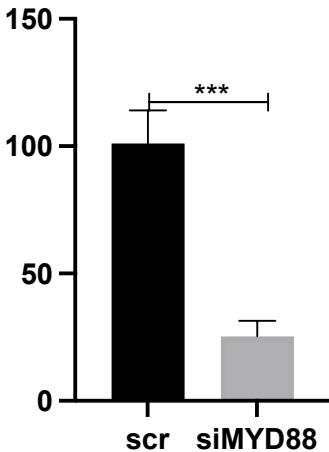

U-87

Supplement: Figure_8.zip [file Figure_8.zip]

# ANGPTL2 – TLR4

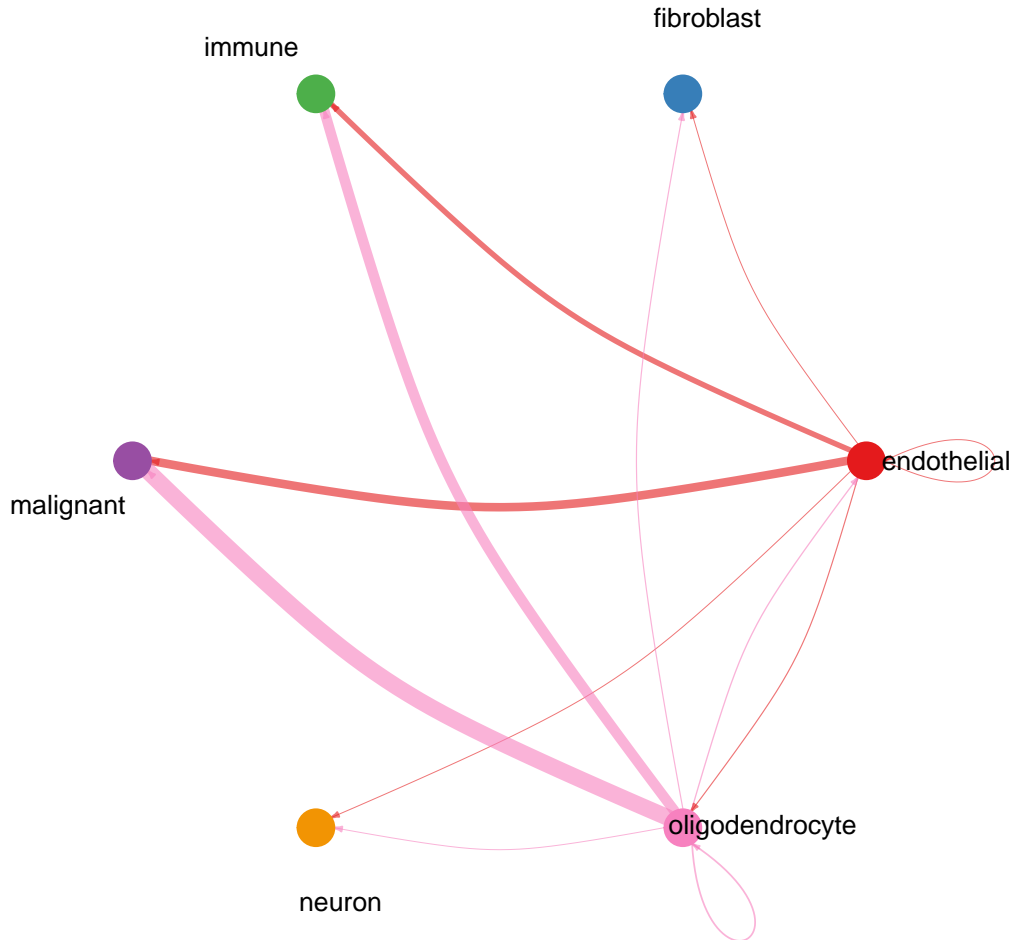

Supplement: Figure_9.zip [file Figure 9A-1.pdf › Figure 9/Figure 9A-1.pdf]

## ANGPTL signaling pathway network

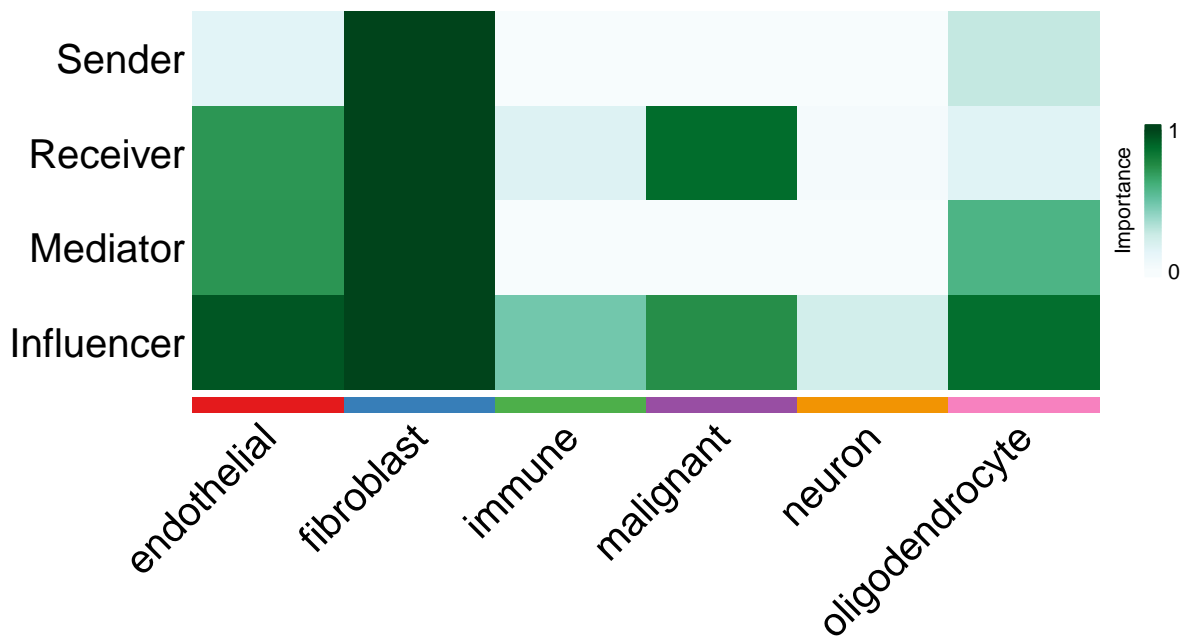

Supplement: Figure_9.zip [file Figure 9A-2.pdf › Figure 9/Figure 9A-2.pdf]

## GAS6 – AXL

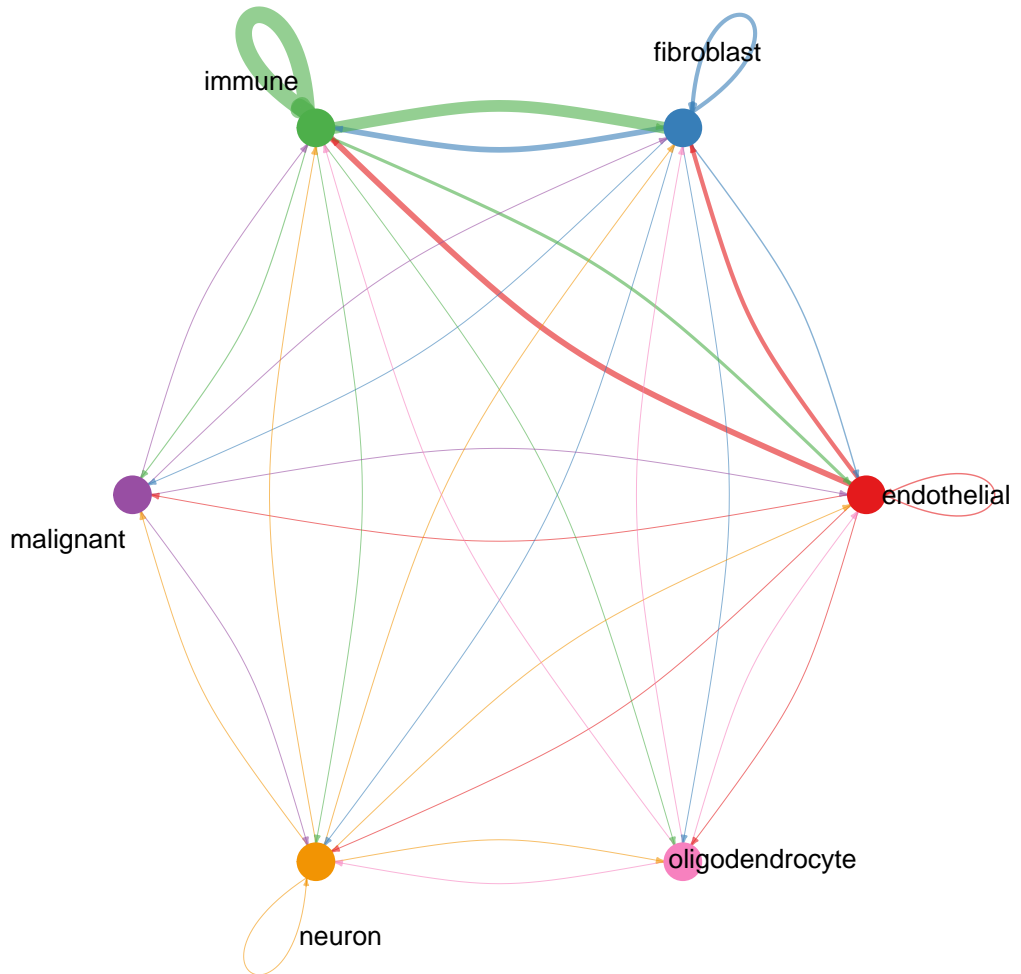

Supplement: Figure_9.zip [file Figure 9B-1.pdf › Figure 9/Figure 9B-1.pdf]

## GAS signaling pathway network

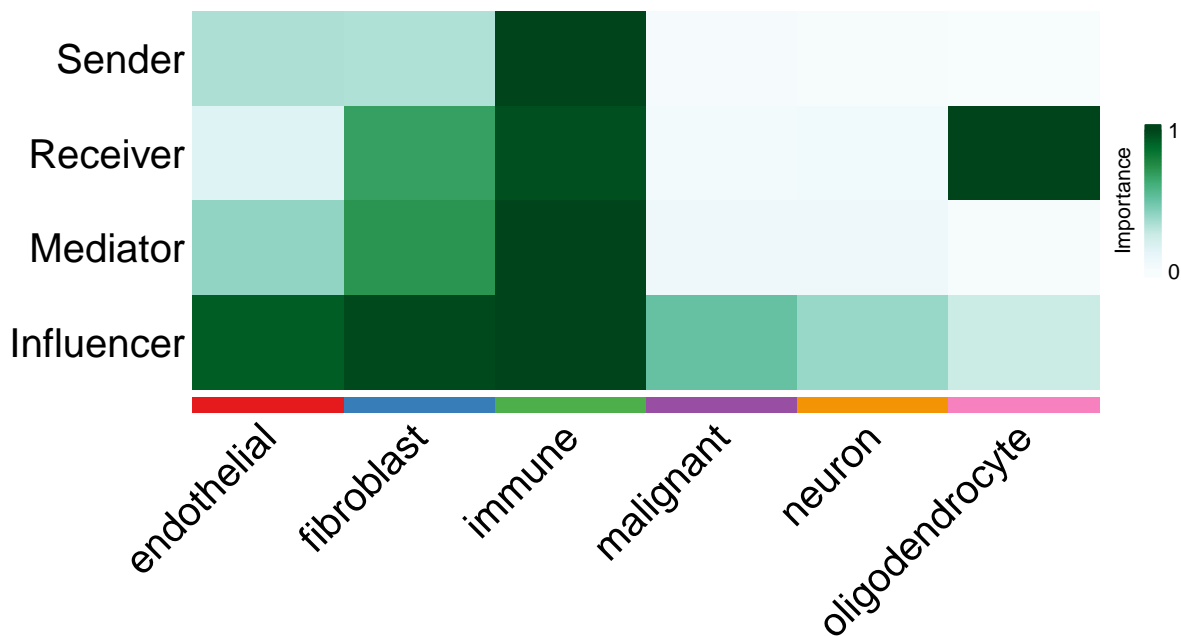

Supplement: Figure_9.zip [file Figure 9B-2.pdf › Figure 9/Figure 9B-2.pdf]

GRN – SORT1

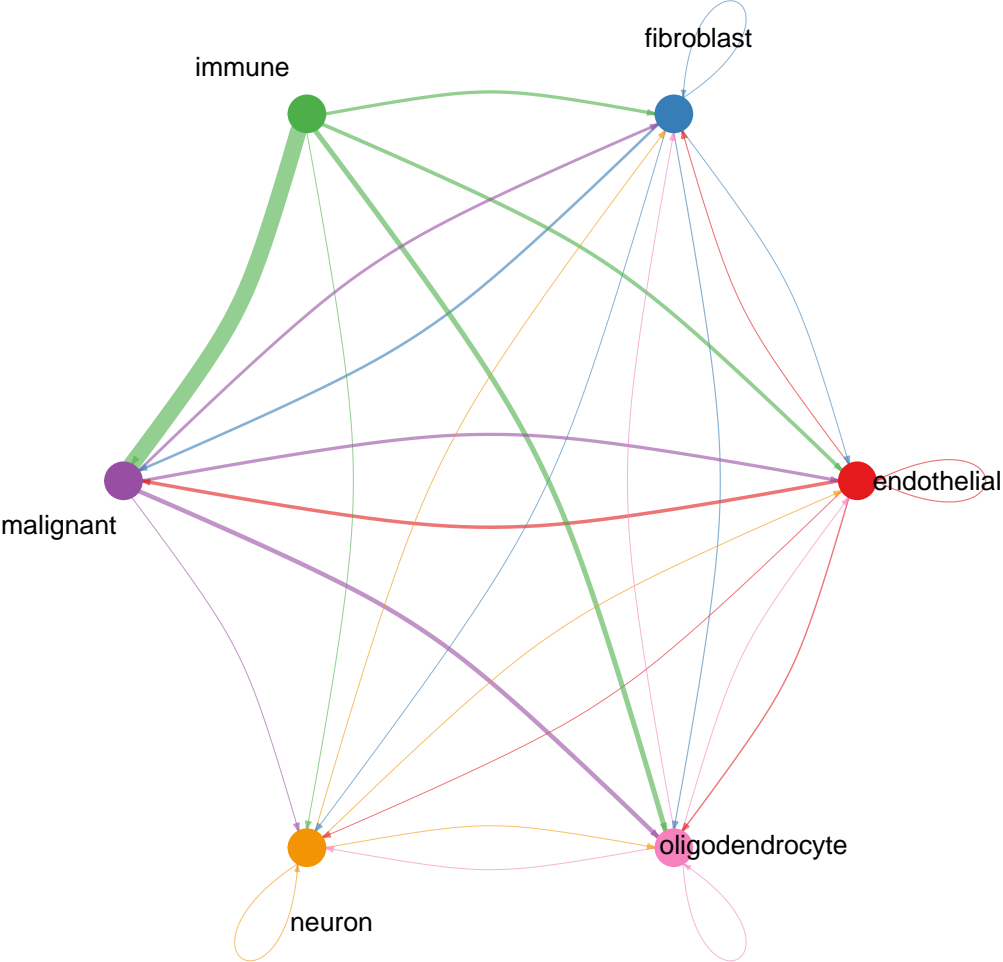

Supplement: Figure_9.zip [file Figure 9C-1.pdf › Figure 9/Figure 9C-1.pdf]

## GRN signaling pathway network

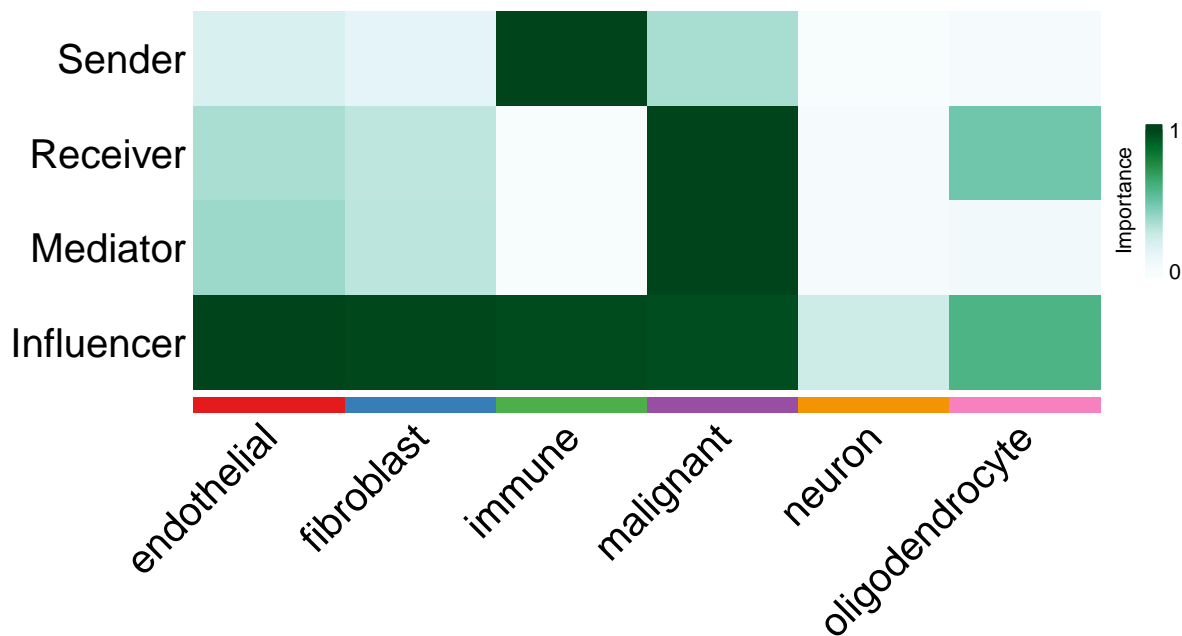

Supplement: Figure_9.zip [file Figure 9C-2.pdf › Figure 9/Figure 9C-2.pdf]

# TNFSF14 – LTBR

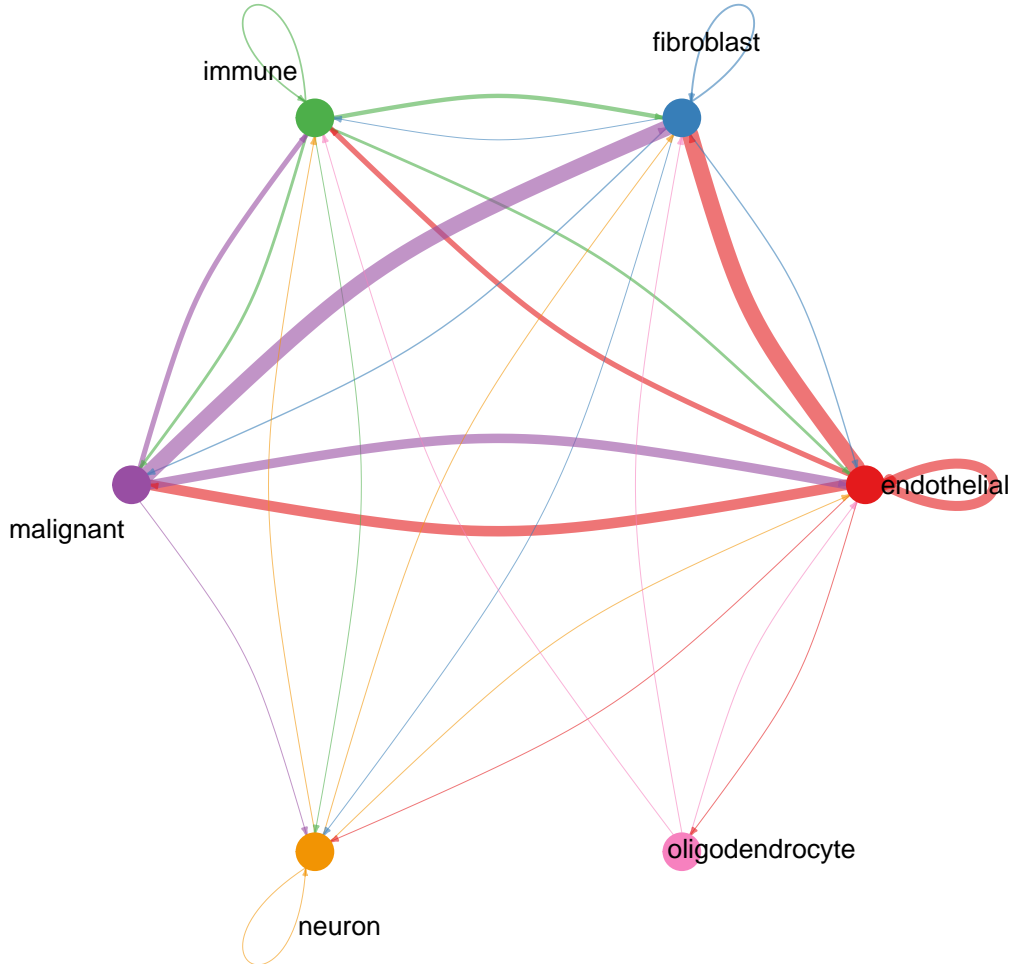

Supplement: Figure_9.zip [file Figure 9D-1.pdf › Figure 9/Figure 9D-1.pdf]

# LIGHT signaling pathway network

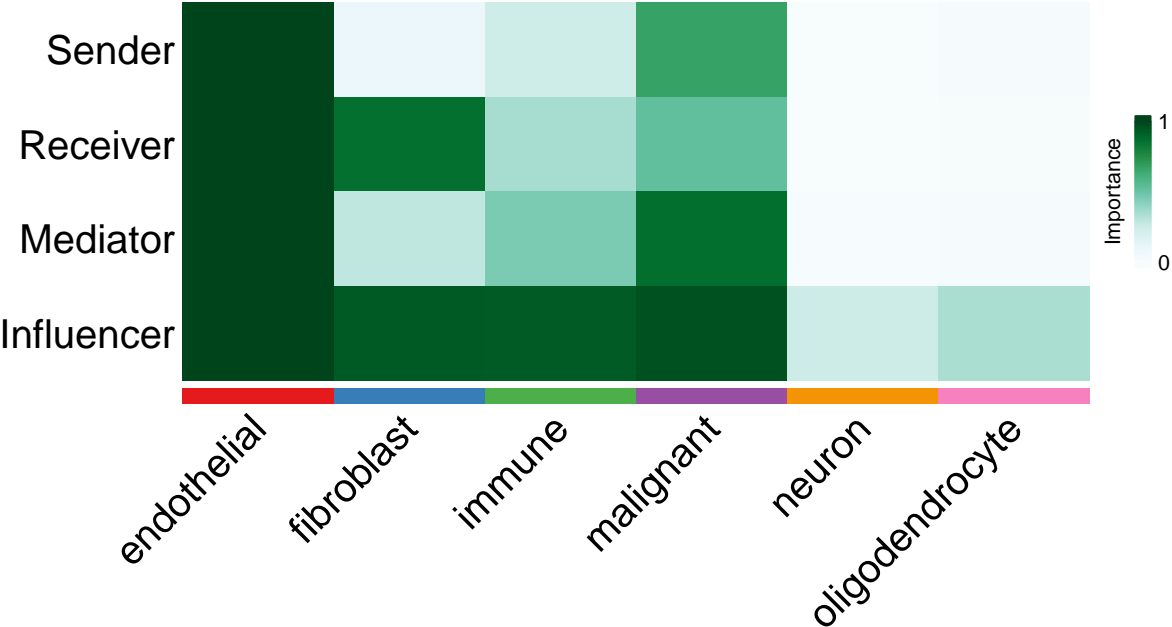

Supplement: Figure_9.zip [file Figure 9D-2.pdf › Figure 9/Figure 9D-2.pdf]

# LTA – TNFRSF1A

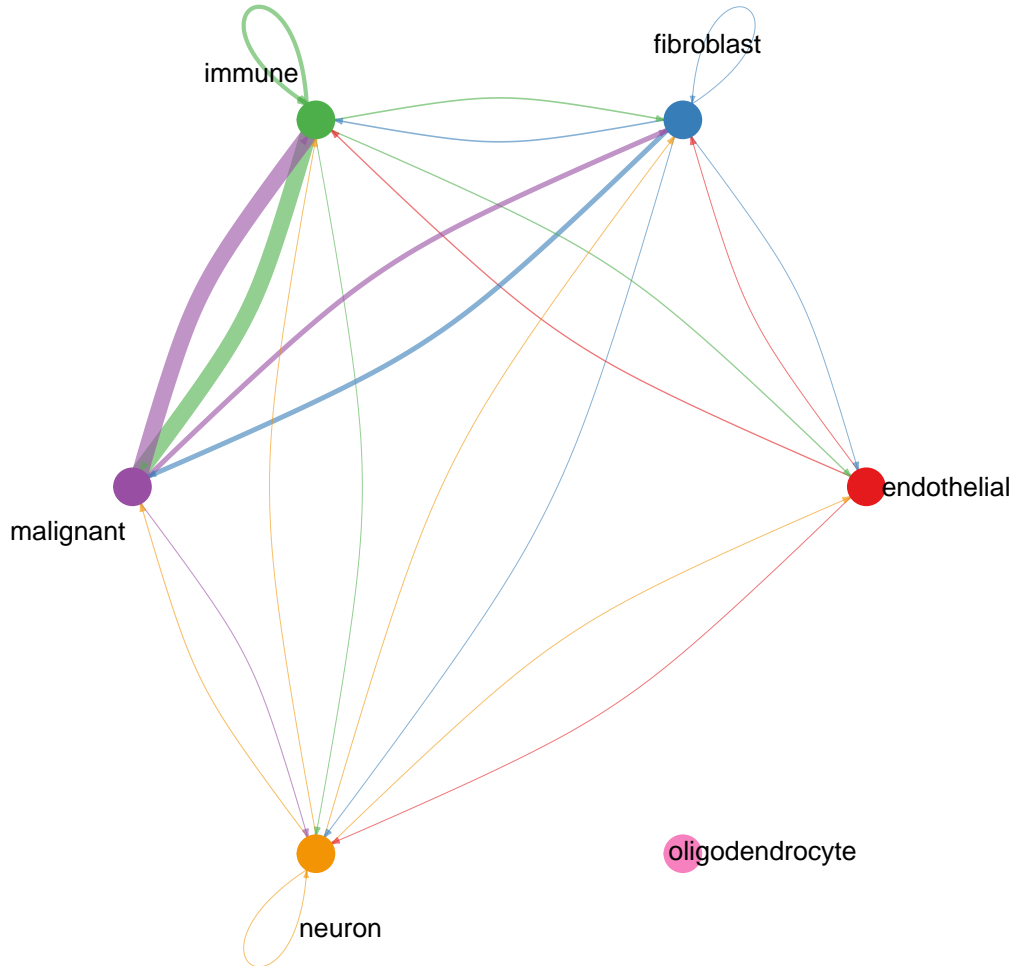

Supplement: Figure_9.zip [file Figure 9E-1.pdf › Figure 9/Figure 9E-1.pdf]

## LT signaling pathway network

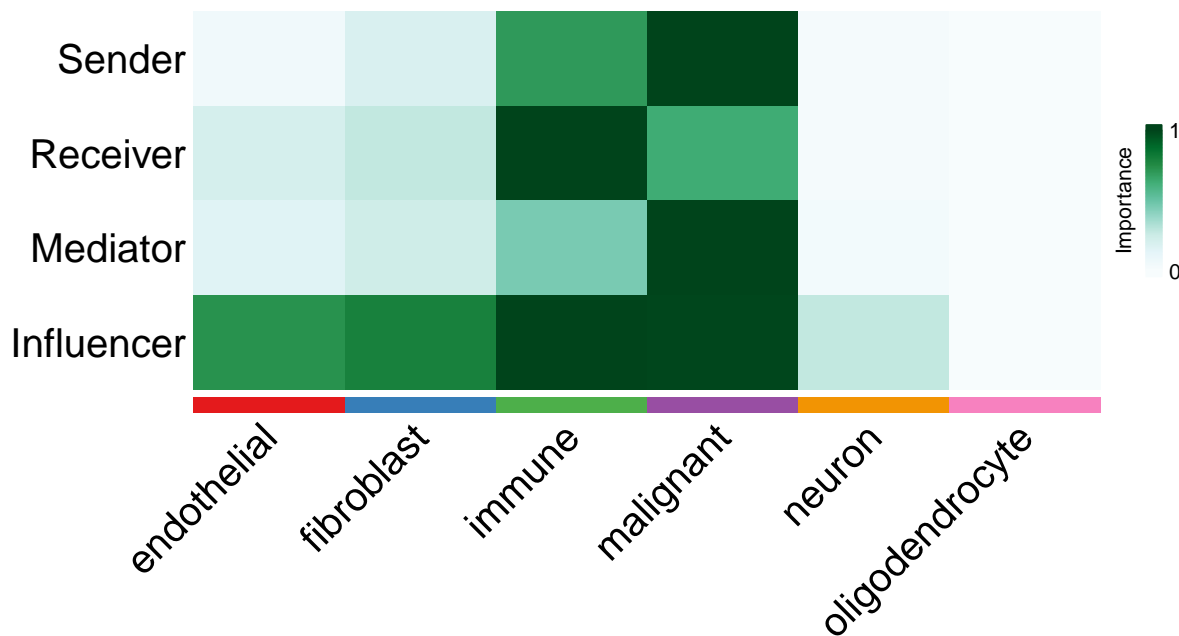

Supplement: Figure_9.zip [file Figure 9E-2.pdf › Figure 9/Figure 9E-2.pdf]

# PGF – VEGFR1

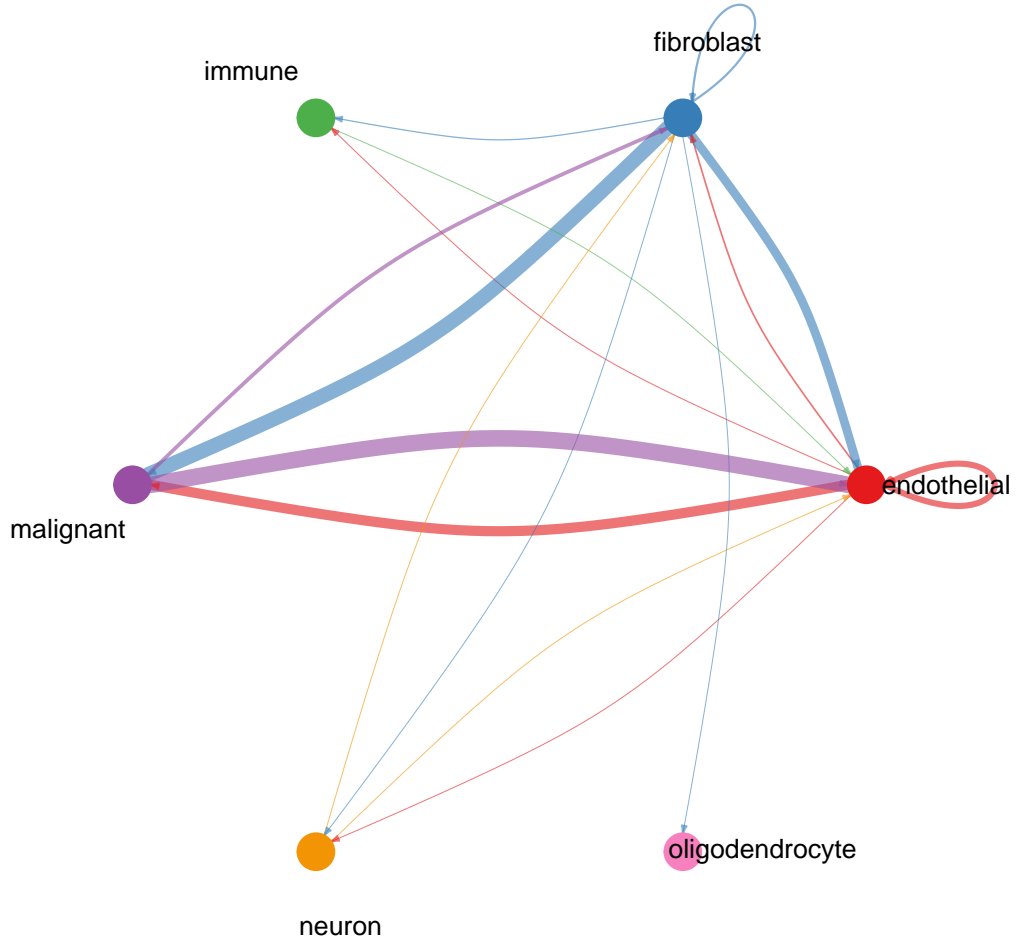

Supplement: Figure_9.zip [file Figure 9F-1.pdf › Figure 9/Figure 9F-1.pdf]

## VEGF signaling pathway network

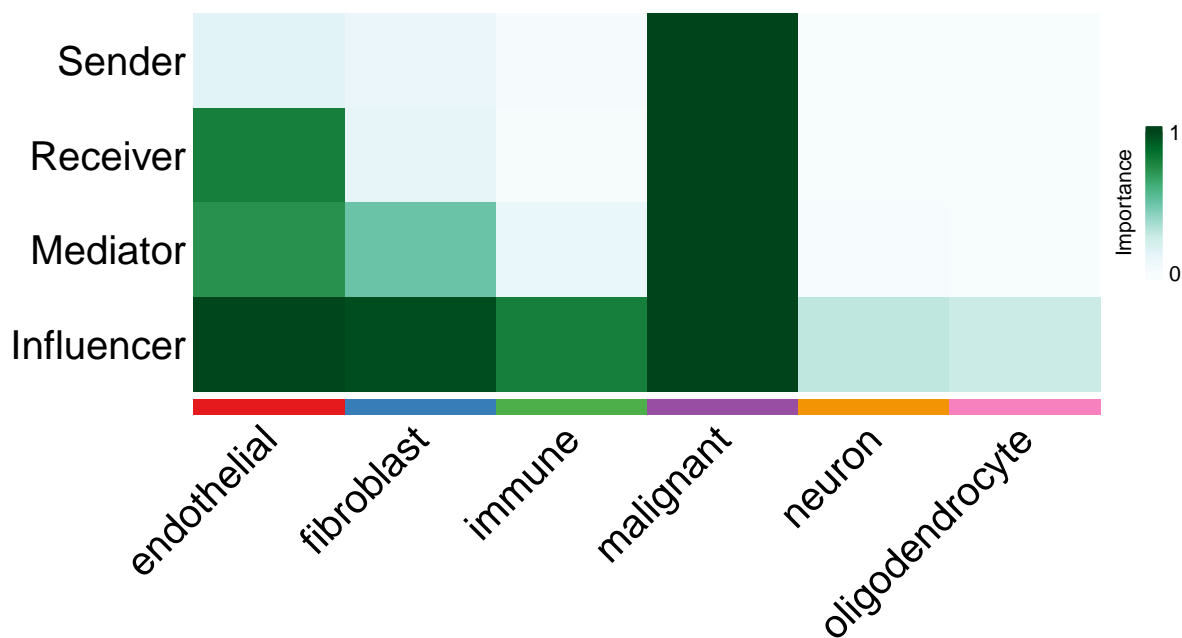

Supplement: Figure_9.zip [file Figure 9F-2.pdf › Figure 9/Figure 9F-2.pdf]

consensus matrix k=4

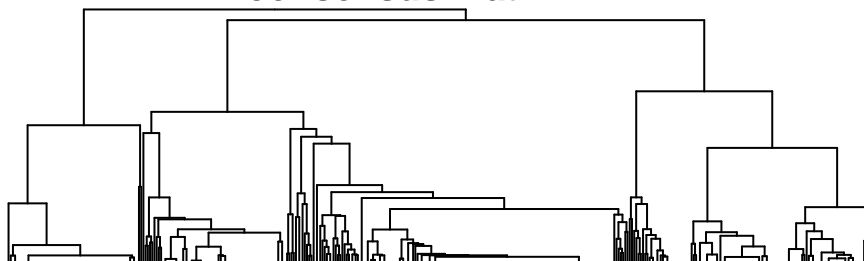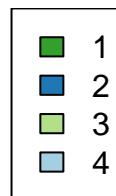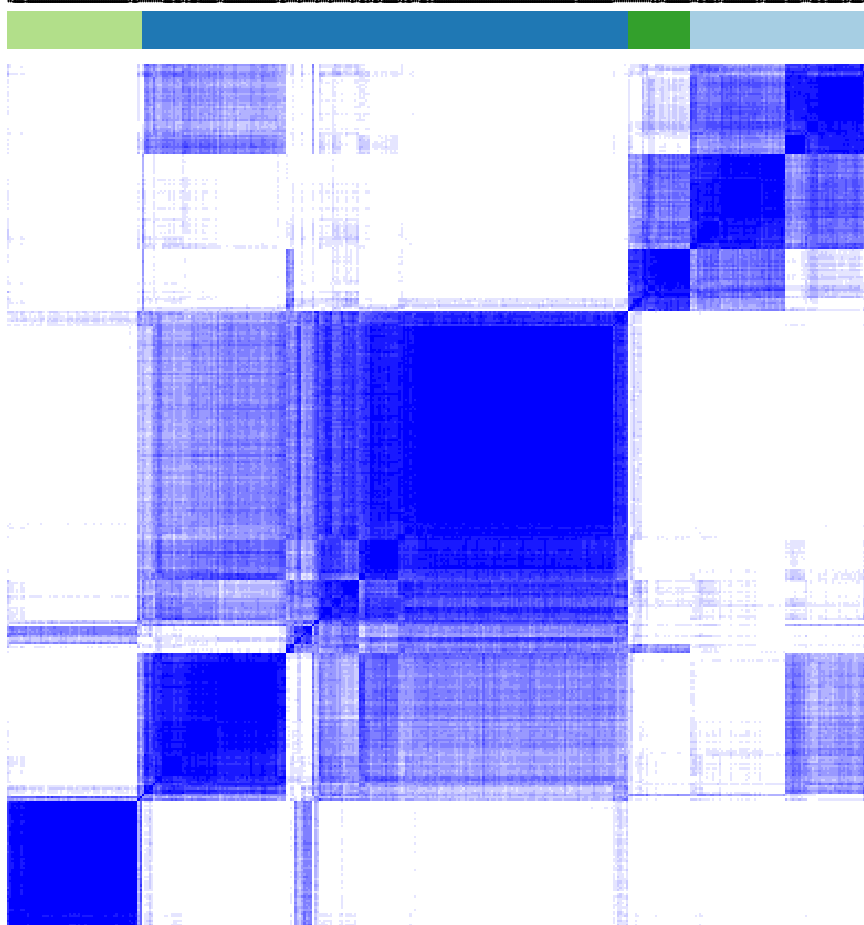

Supplement: Figure_S1.zip [file Figure_S1.zip]

consensus matrix k=7

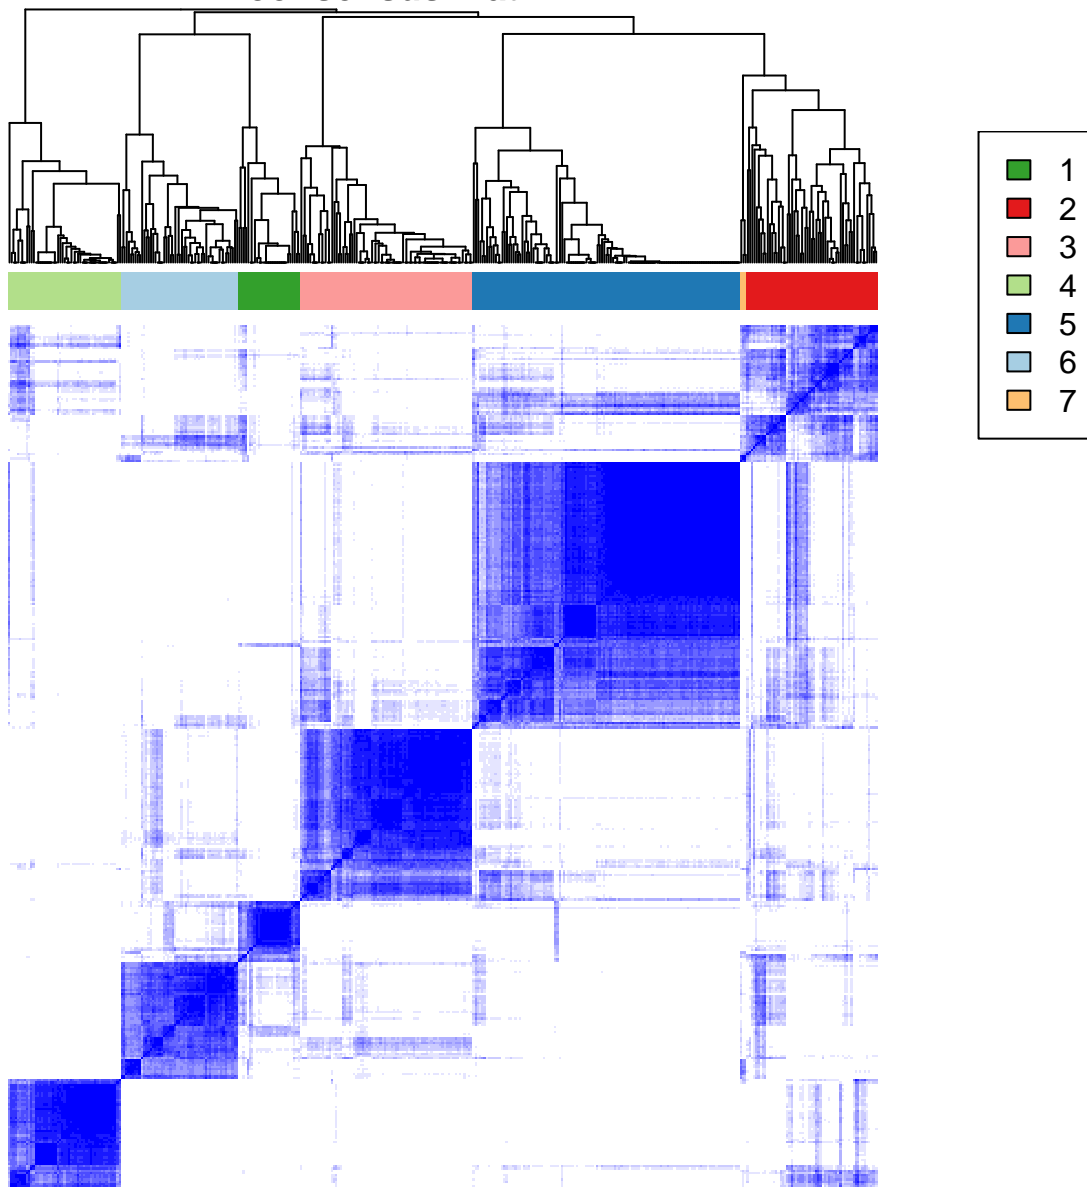

Supplement: Figure_S1.zip [file Figure_S1.zip]

consensus matrix k=8

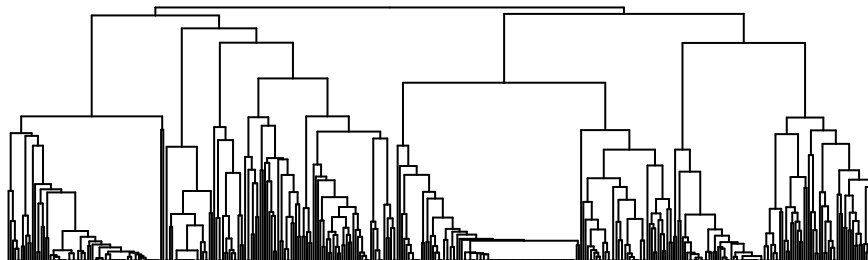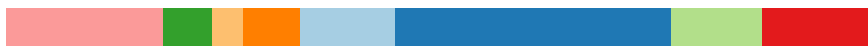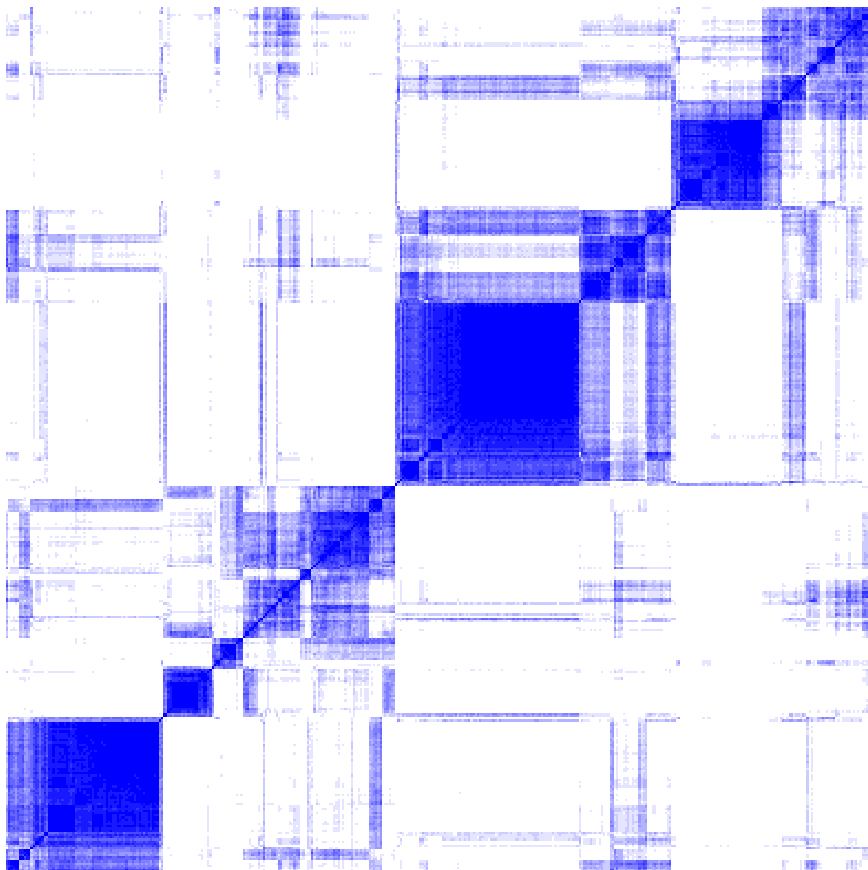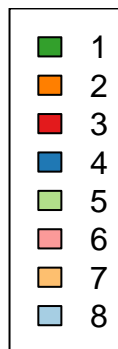

Supplement: Figure_S1.zip [file Figure_S1.zip]

consensus matrix k=6

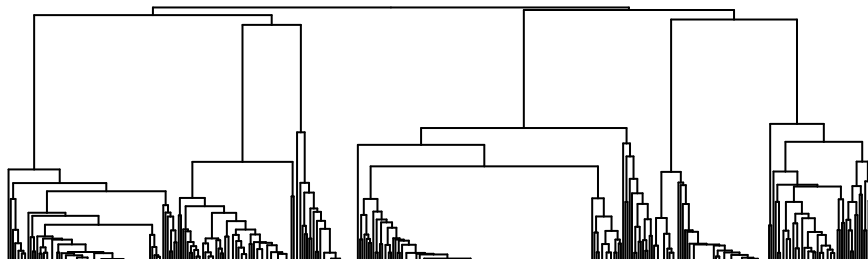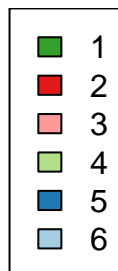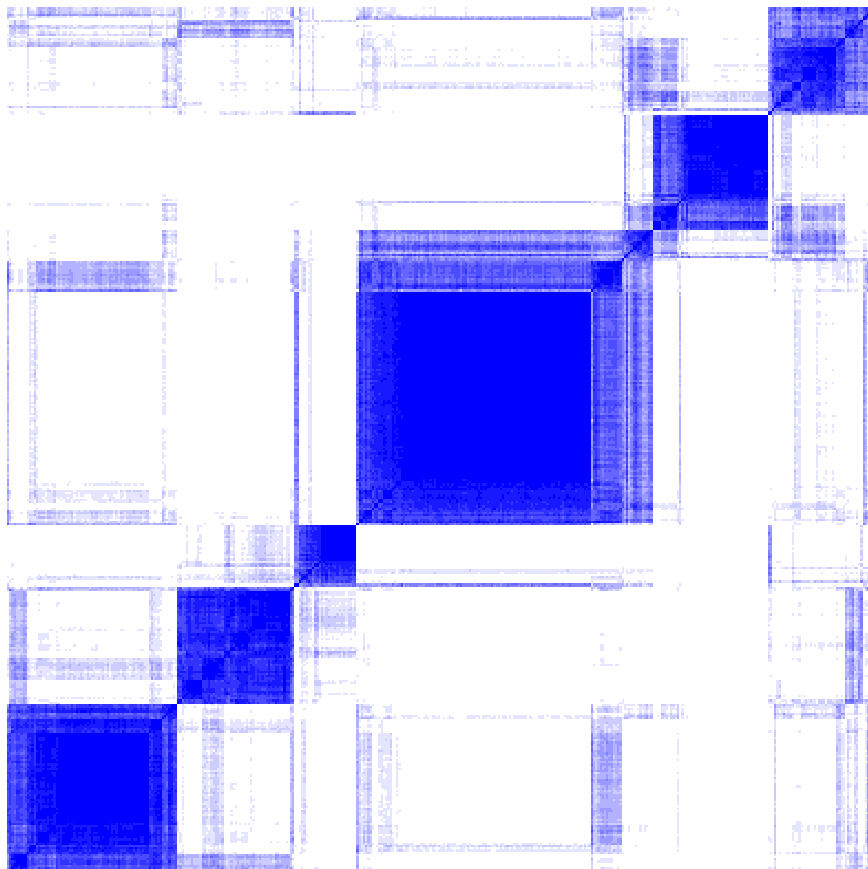

Supplement: Figure_S1.zip [file Figure_S1.zip]

consensus matrix k=5

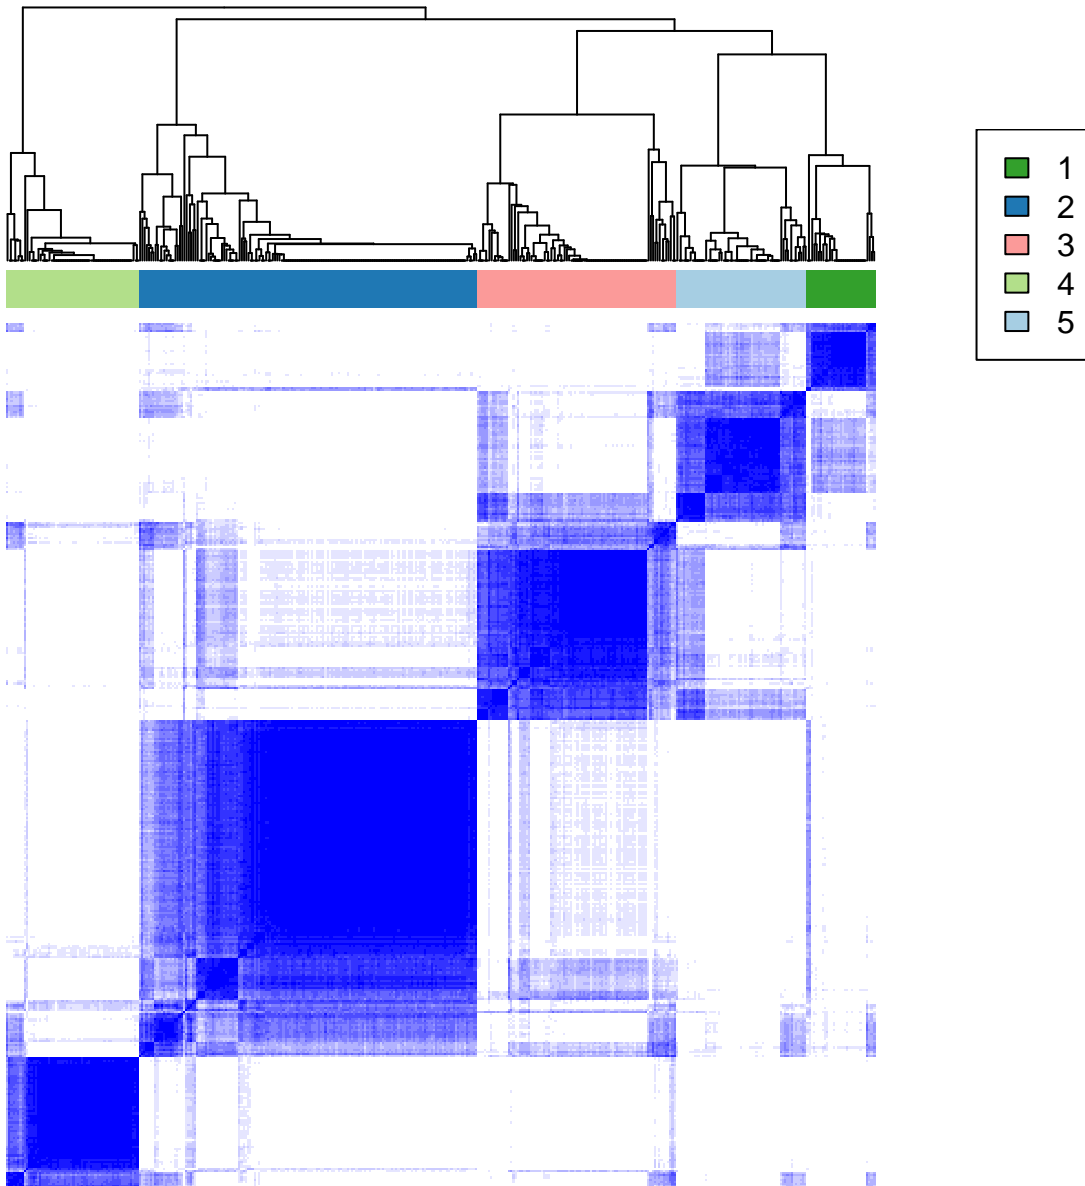

Supplement: Figure_S1.zip [file Figure_S1.zip]

consensus matrix k=2

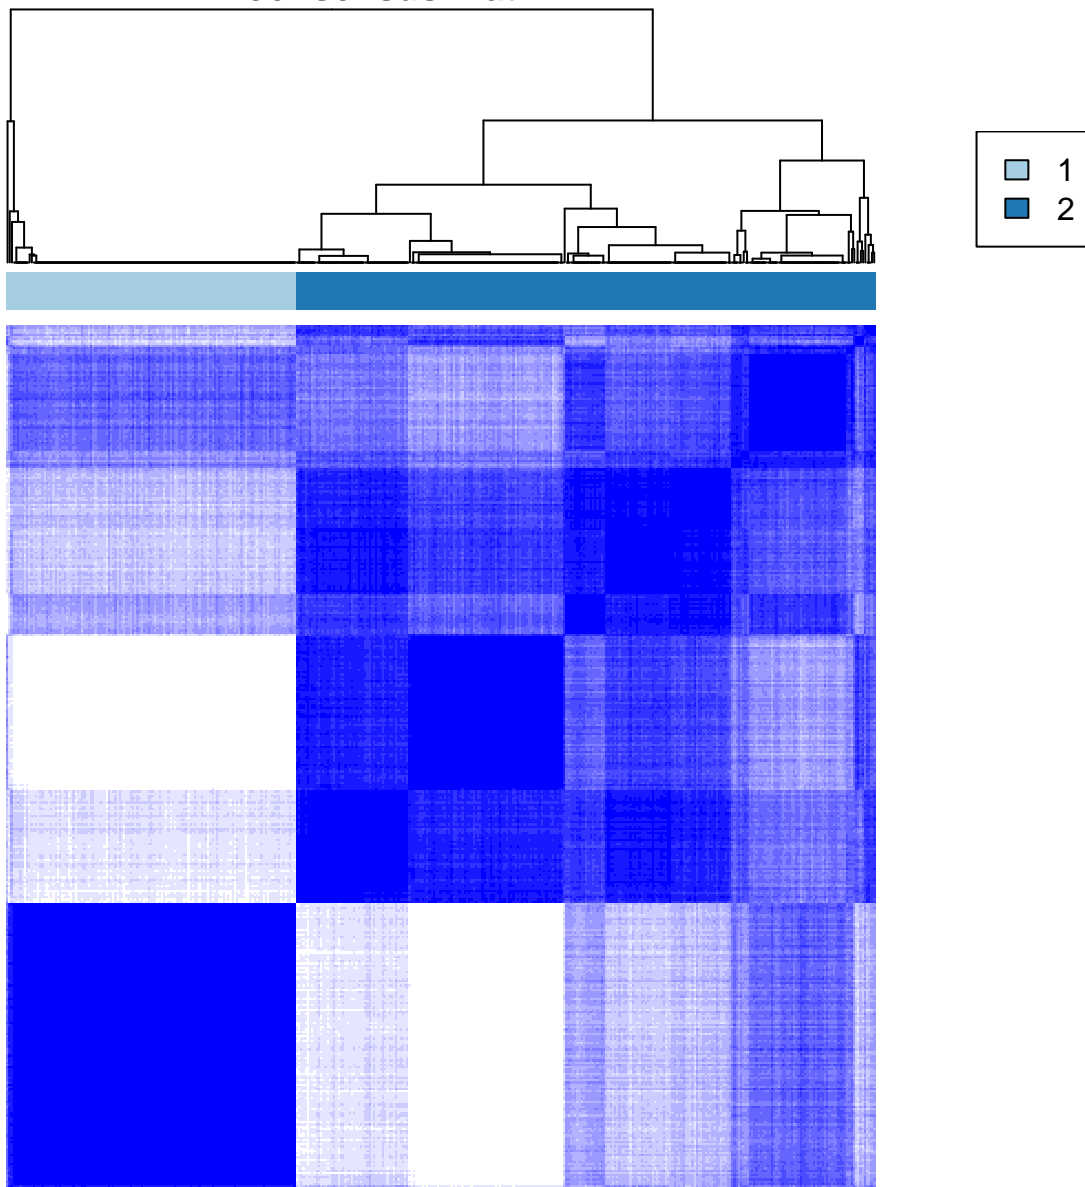

Supplement: Figure_S1.zip [file Figure_S1.zip]
